# Supplementary material for: Phenyliodonium diacetate mediated carbotrifluoromethylation of N-acylhydrazones
Source: Royal Society of Chemistry journal article supplement (doi:10.1039/c6ob02041k), 2016-01-01
Supplement: c6ob02041k1.pdf [file c6ob02041k1.pdf]

# **Phenylodonium Diacetate Mediated Carbotrifluoromethylation of *N*-Acylhydrazones**

Weigang Zhang,<sup>a</sup> Yingpeng Su,<sup>a</sup> Siying Chong,<sup>a</sup> Lili Wu,<sup>a</sup> Guiyan Cao,<sup>a</sup> Danfeng  
Huang,<sup>a</sup> Ke-Hu Wang<sup>a</sup> and Yulai Hu<sup>a,b,\*</sup>

<sup>a</sup> College of Chemistry and Chemical Engineering, Northwest Normal University 967  
Anning East Road, Lanzhou 730070, P. R. China

<sup>b</sup> State Key Laboratory of Applied Organic Chemistry, Lanzhou University, Lanzhou  
730000, P. R. China

E-mail: [huyl@nwnu.edu.cn](mailto:huyl@nwnu.edu.cn)

# Supporting Information

## Table of Contents

|                                                             |    |
|-------------------------------------------------------------|----|
| 1. Spectra copies of all compounds and control experiments. | 4  |
| NMR copies of major product of compound <b>5a</b> :         | 4  |
| NMR copies of major product of compound <b>6a</b> :         | 5  |
| NMR copies of major product of compound <b>5b</b> :         | 6  |
| NMR copies of major product of compound <b>6b</b> :         | 8  |
| NMR copies of major product of compound <b>5c</b> :         | 9  |
| NMR copies of major product of compound <b>5d</b> :         | 11 |
| NMR copies of major product of compound <b>5e</b> :         | 12 |
| NMR copies of major product of compound <b>5f</b> :         | 14 |
| NMR copies of major product of compound <b>5g</b> :         | 15 |
| NMR copies of major product of compound <b>5h</b> :         | 17 |
| NMR copies of major product of compound <b>5i</b> :         | 18 |
| NMR copies of major product of compound <b>5j</b> :         | 20 |
| NMR copies of major product of compound <b>5k</b> :         | 21 |
| NMR copies of major product of compound <b>5l</b> :         | 23 |
| NMR copies of major product of compound <b>5m</b> :         | 24 |
| NMR copies of major product of compound <b>5n</b> :         | 26 |
| NMR copies of major product of compound <b>5o</b> :         | 27 |
| NMR copies of major product of compound <b>5p</b> :         | 29 |
| NMR copies of major product of compound <b>5q</b> :         | 30 |
| NMR copies of major product of compound <b>5r</b> :         | 32 |
| NMR copies of major product of compound <b>5s</b> :         | 34 |

|                                                      |    |
|------------------------------------------------------|----|
| NMR copies of major product of compound <b>5t</b> :  | 36 |
| NMR copies of major product of compound <b>5ia</b> : | 38 |
| NMR copies of major product of compound <b>5ib</b> : | 39 |
| NMR copies of major product of compound <b>5ic</b> : | 41 |
| NMR copies of major product of compound <b>5id</b> : | 43 |
| NMR copies of major product of compound <b>5ja</b> : | 44 |
| NMR copies of major product of compound <b>5jb</b> : | 46 |
| NMR copies of major product of compound <b>5jc</b> : | 47 |
| NMR copies of major product of compound <b>5jd</b> : | 49 |
| NMR copies of major product of compound <b>5je</b> : | 51 |
| NMR copies of major product of compound <b>5jf</b> : | 53 |
| NMR copies of major product of compound <b>5jg</b> : | 54 |
| NMR copies of major product of compound <b>5jh</b> : | 56 |
| NMR copies of major product of compound <b>5ji</b> : | 58 |
| NMR copies of major product of compound <b>5jk</b> : | 61 |
| NMR copies of major product of compound <b>5jm</b> : | 63 |
| NMR copies of major product of compound <b>5jp</b> : | 64 |
| NMR copies of major product of compound <b>5jq</b> : | 66 |
| NMR copies of major product of compound <b>5jr</b> : | 67 |
| NMR copies of major product of compound <b>5js</b> : | 69 |
| NMR copies of major product of compound <b>5jt</b> : | 70 |
| NMR copies of major product of compound <b>5qa</b> : | 72 |
| NMR copies of major product of compound <b>5qb</b> : | 73 |
| NMR copies of major product of compound <b>5qc</b> : | 75 |
| NMR copies of major product of compound <b>8a</b> :  | 76 |

|                                                                                                   |    |
|---------------------------------------------------------------------------------------------------|----|
| NMR copies of major product of compound <b>8b</b> :                                               | 78 |
| NMR copies of major product of compound <b>9</b> :                                                | 79 |
| NMR copies of major product of compound <b>10</b> :                                               | 81 |
| NMR copie of control experiment of <b>1jh</b> under standard reaction condition with TEMPO:       | 82 |
| NMR copie of control experiment to proof the existence of the CF <sub>3</sub> radical <b>18</b> : | 83 |
| NMR copie of control experiment to proof the existence of the intermediate TMSF <b>13</b> :       | 84 |
| 2. X-ray crystallographic data of <b>5a</b> and <b>6a</b>                                         | 84 |



## 1. Spectra copies of all compounds and control experiments.

NMR copies of major product of compound **5a**:

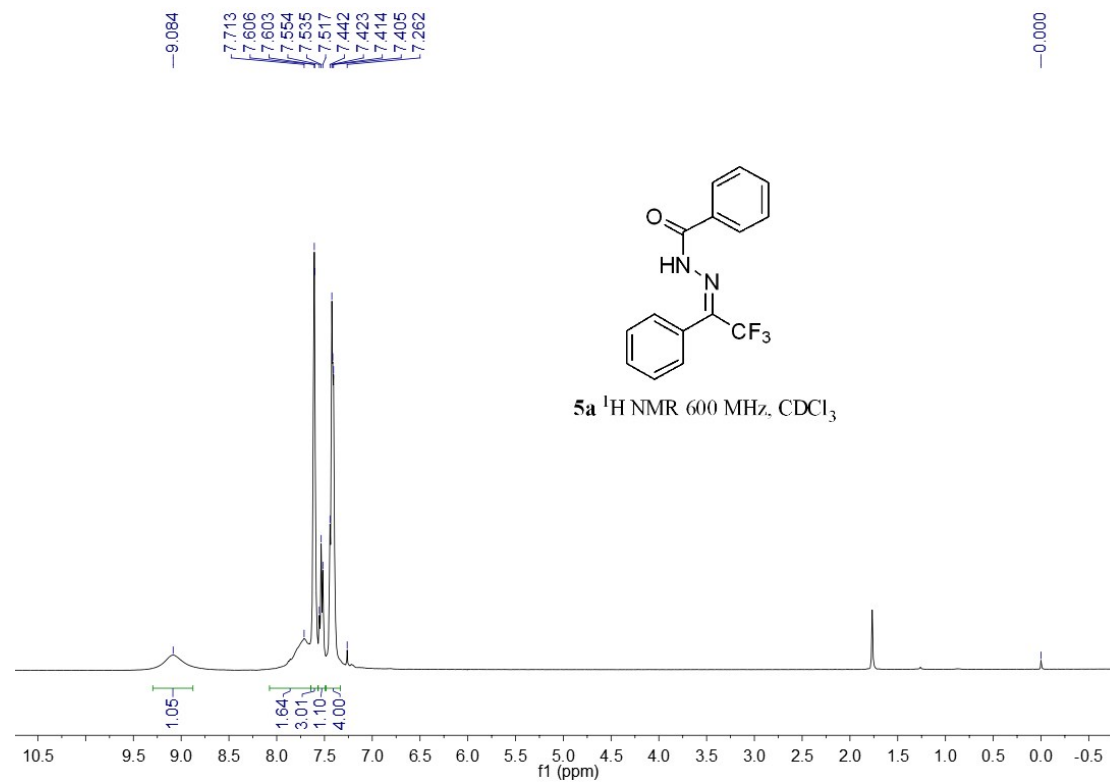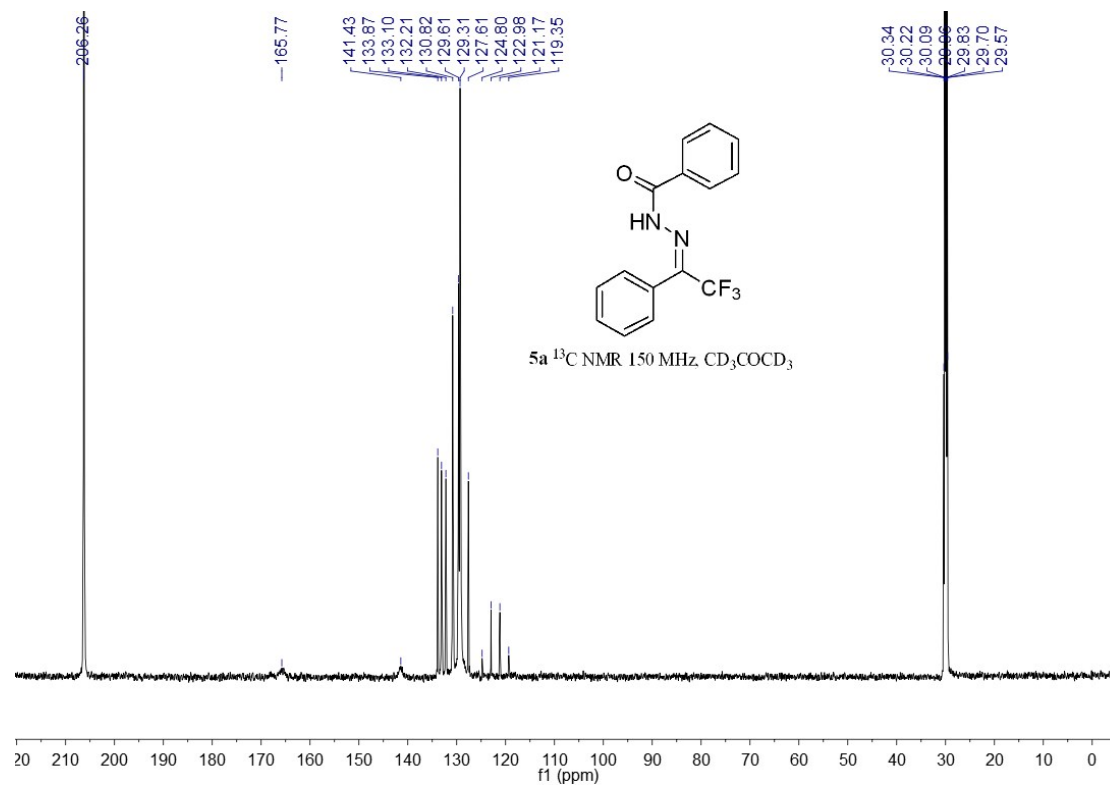

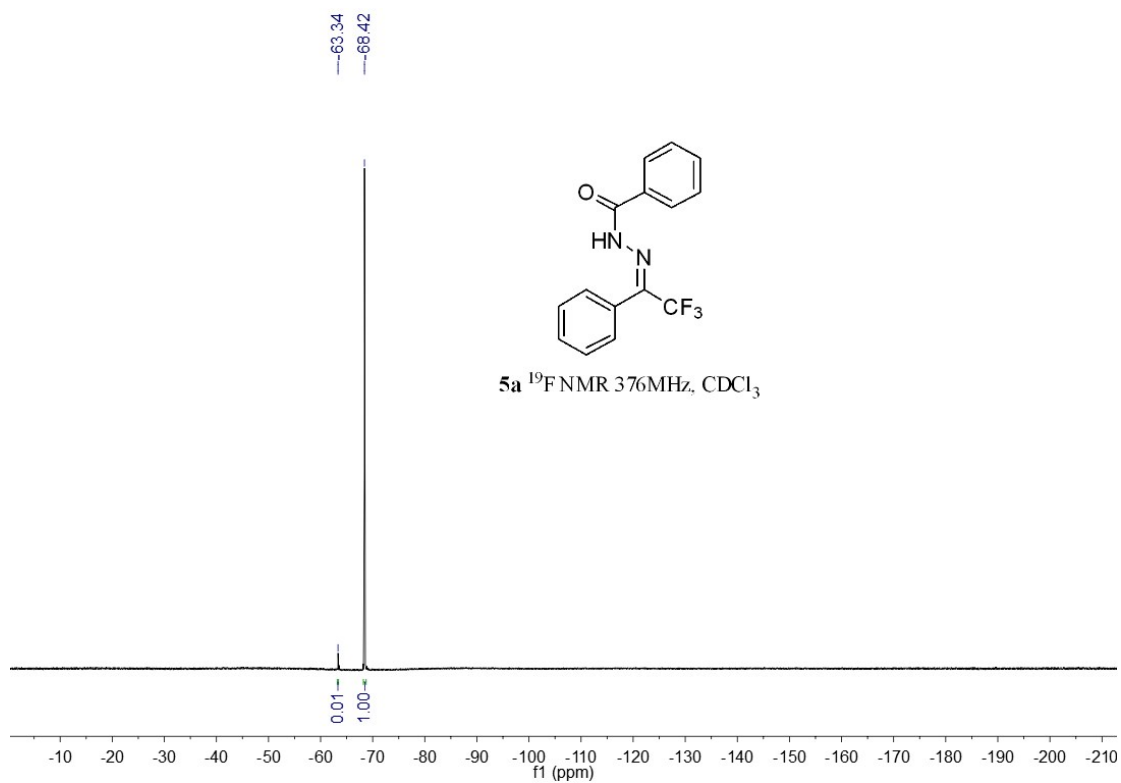

NMR copies of major product of compound **6a**:

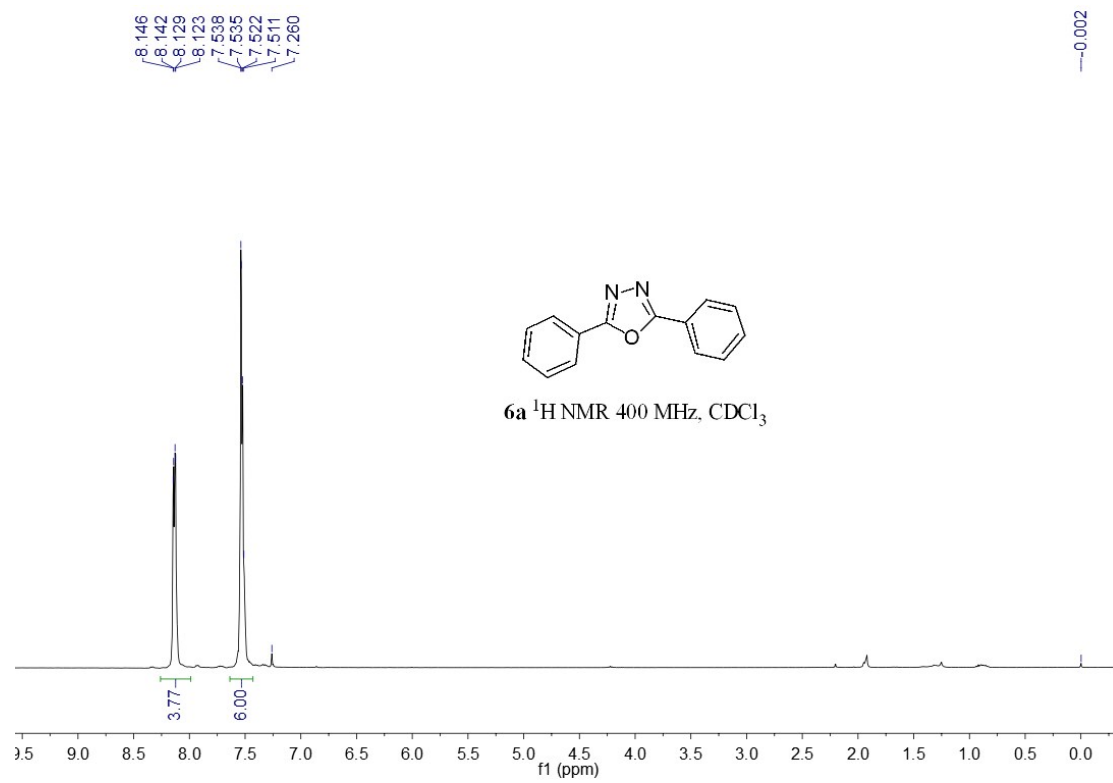

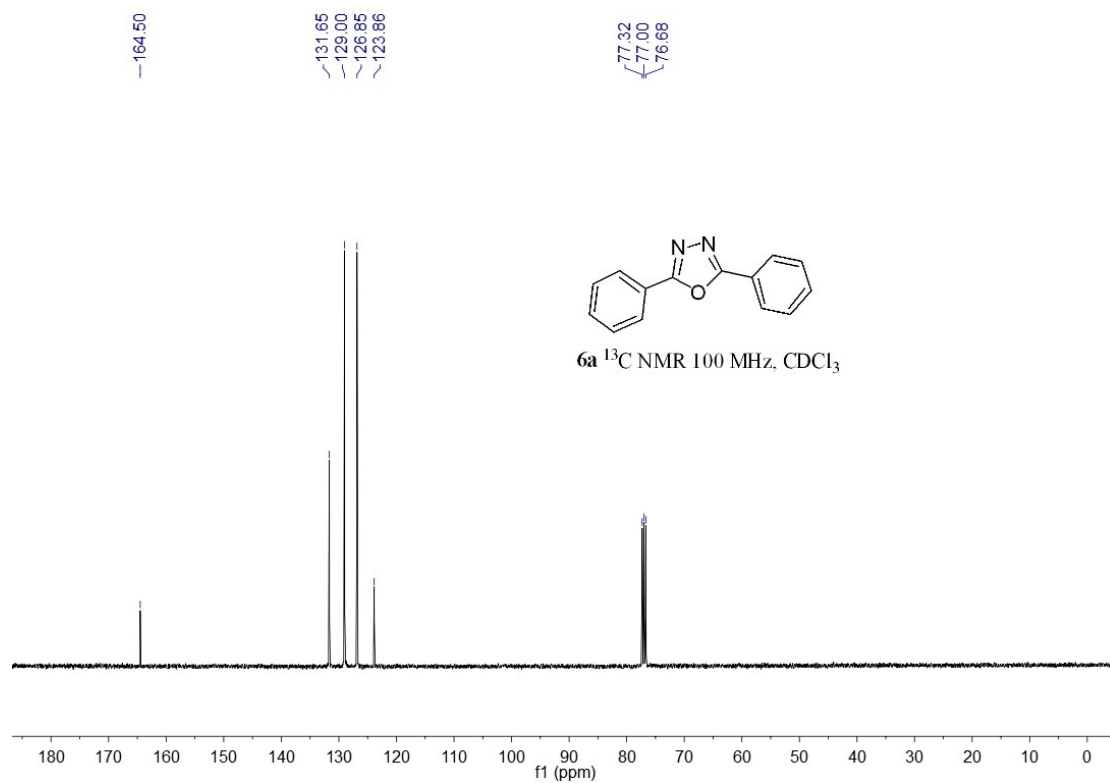

NMR copies of major product of compound **5b**:

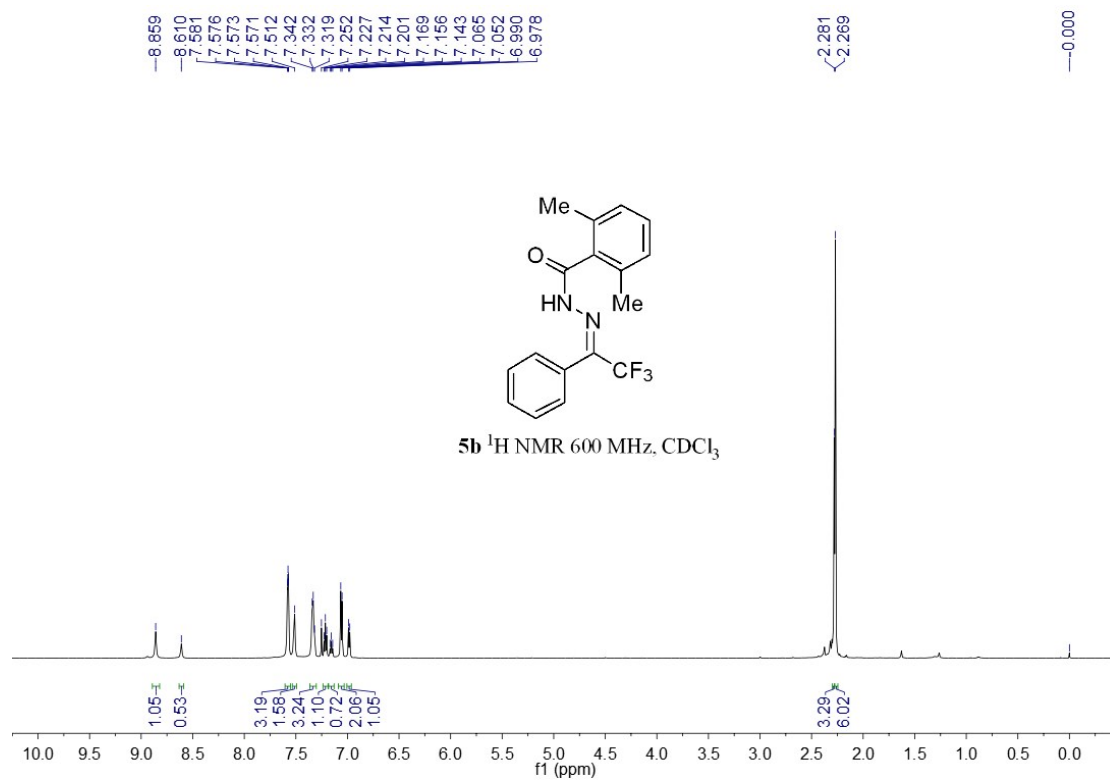

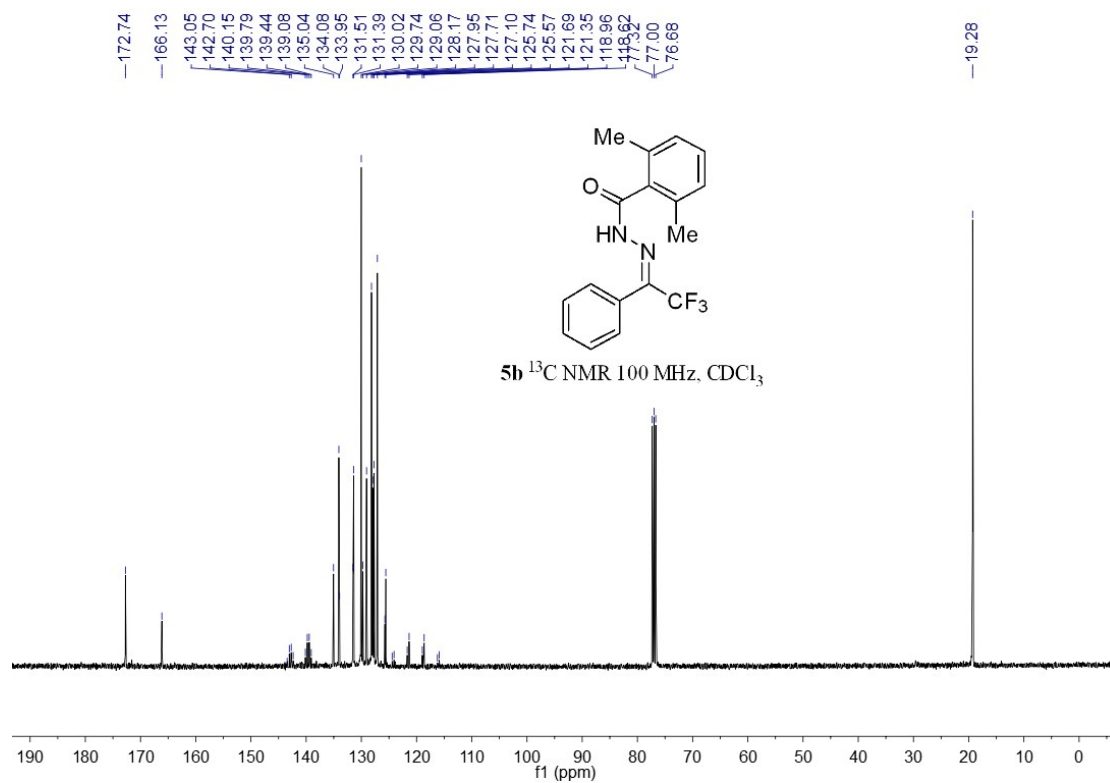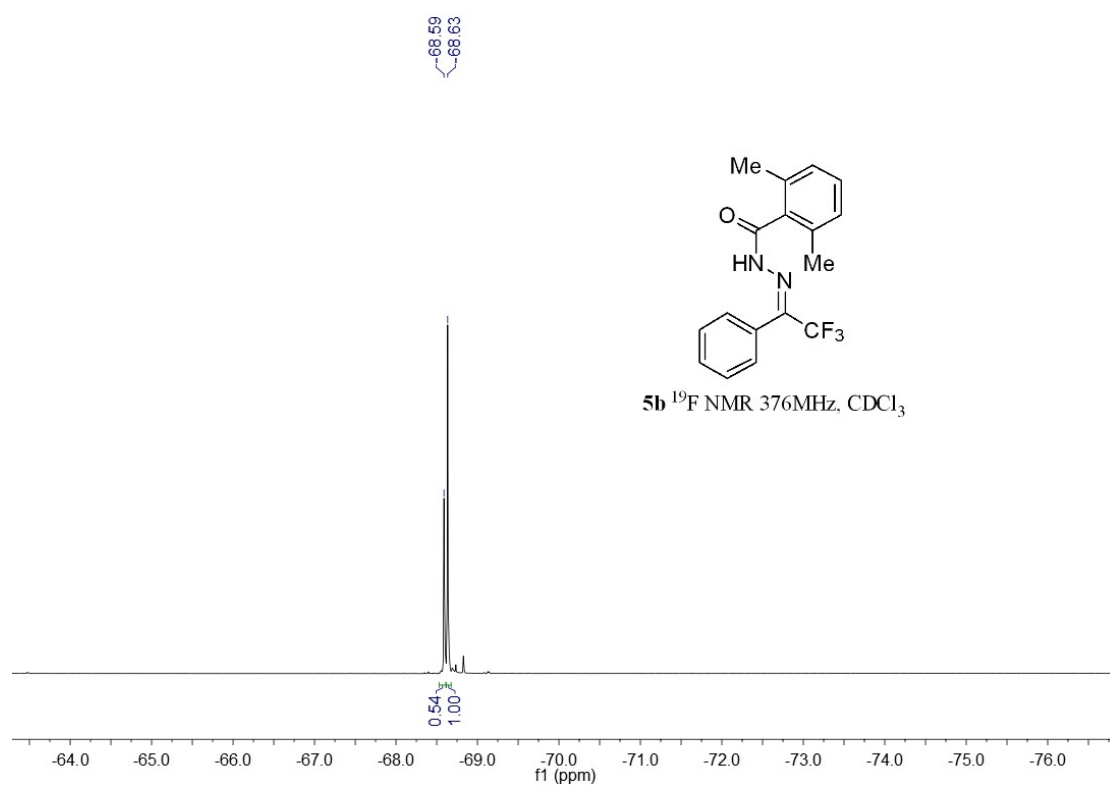

NMR copies of major product of compound **6b**:

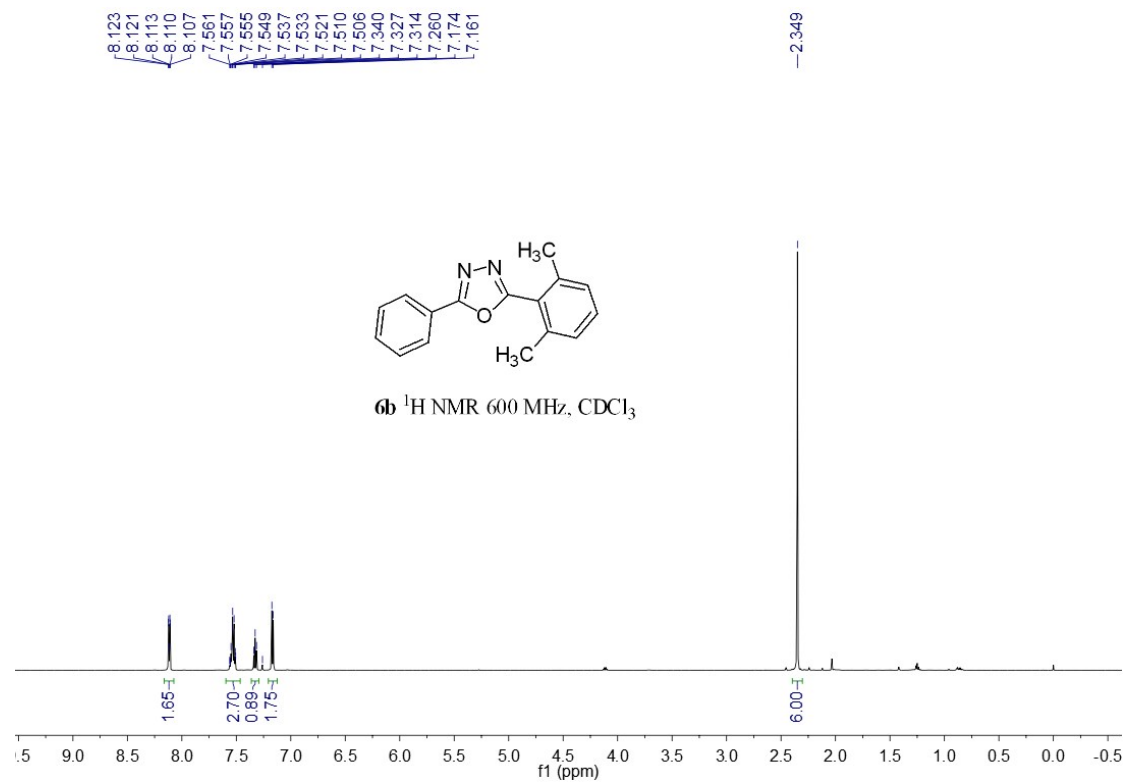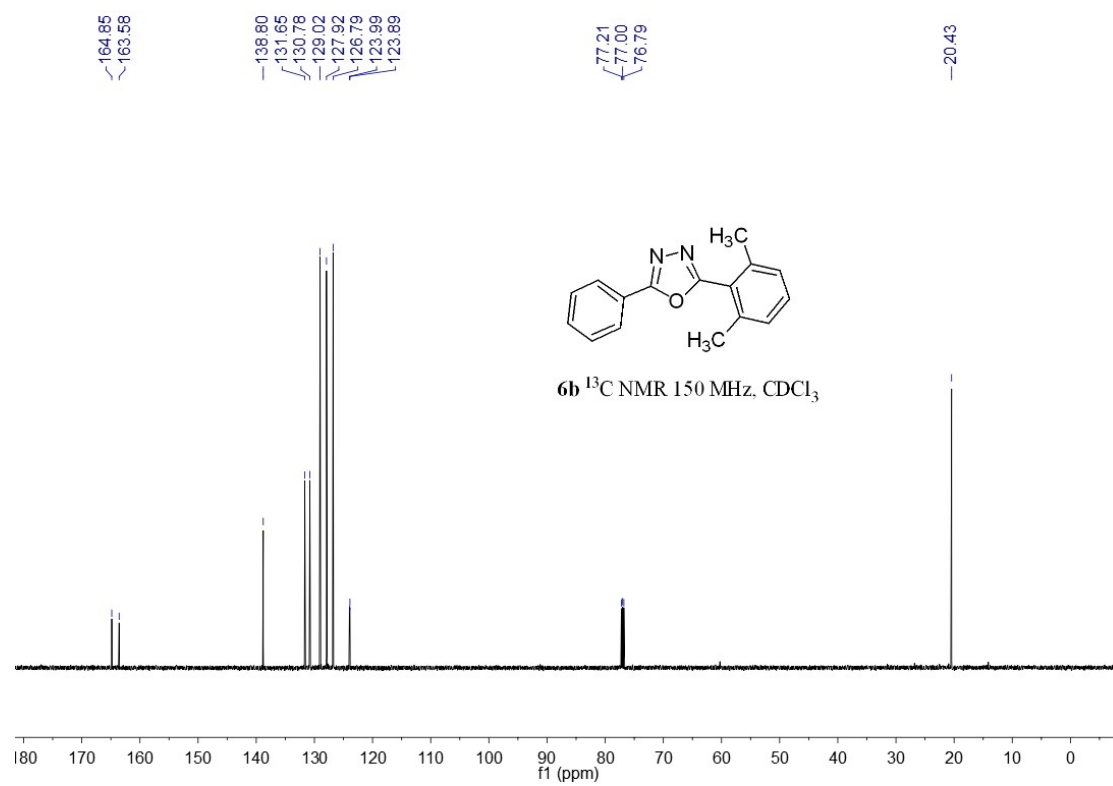

NMR copies of major product of compound **5c**:

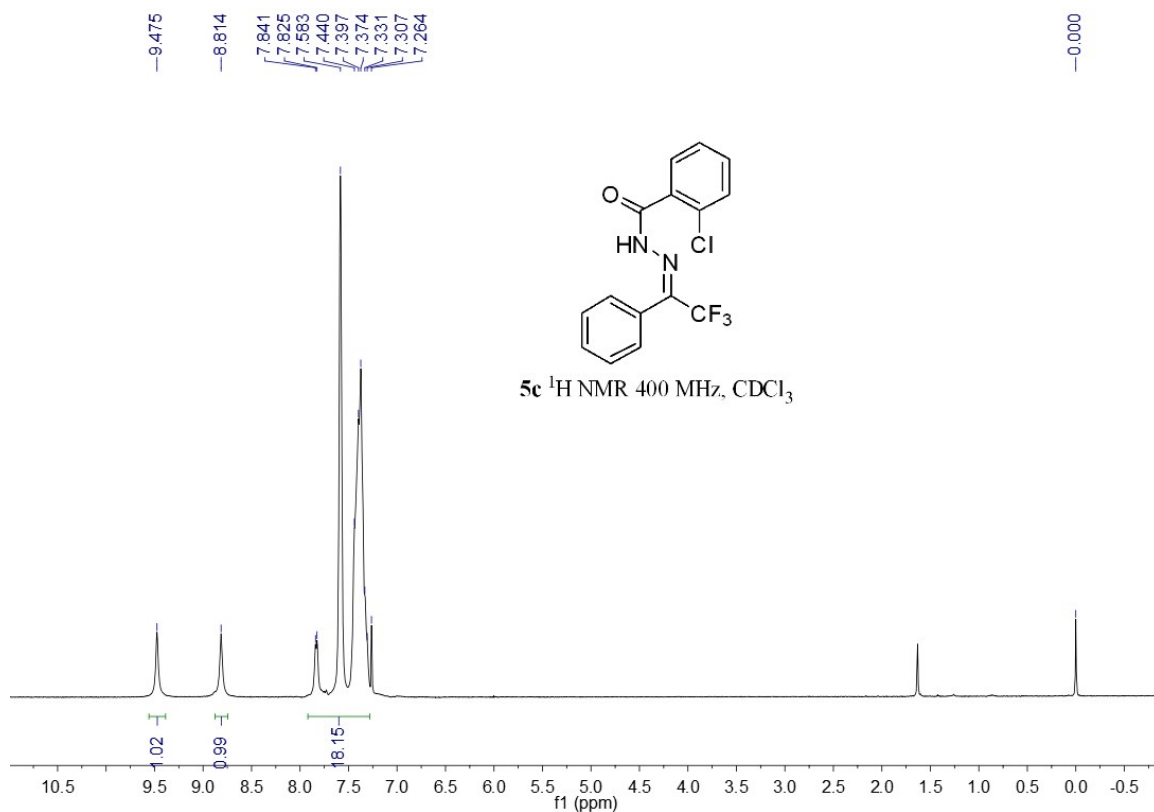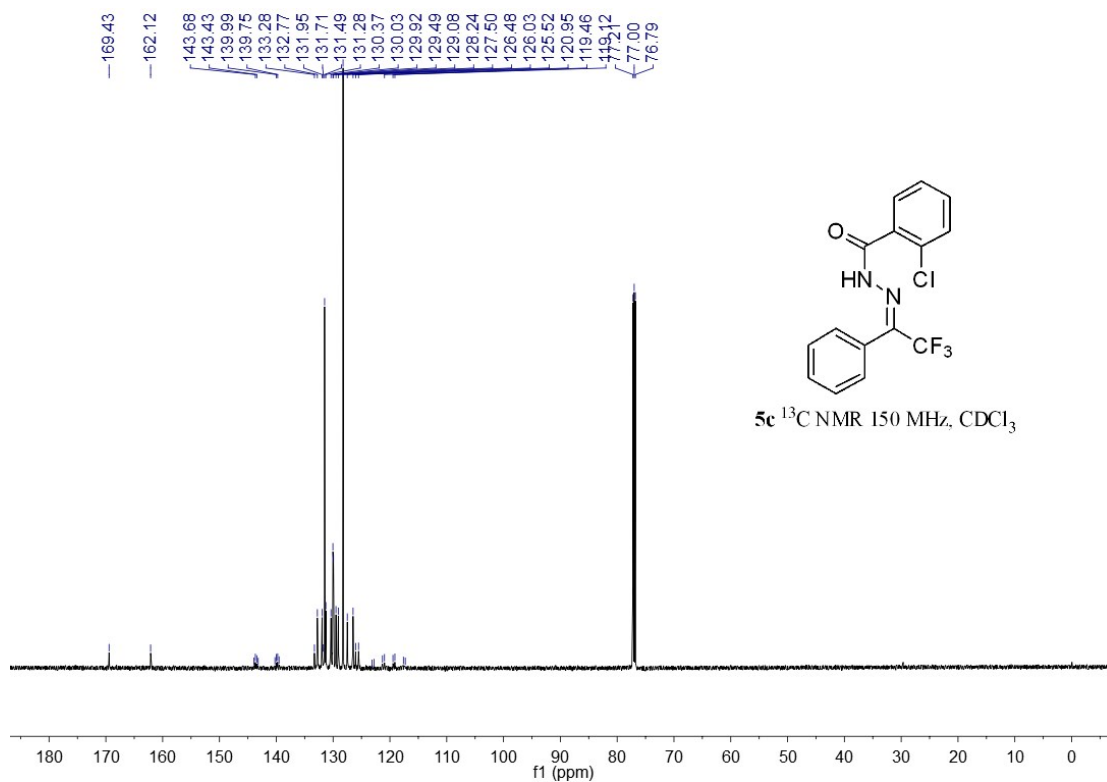

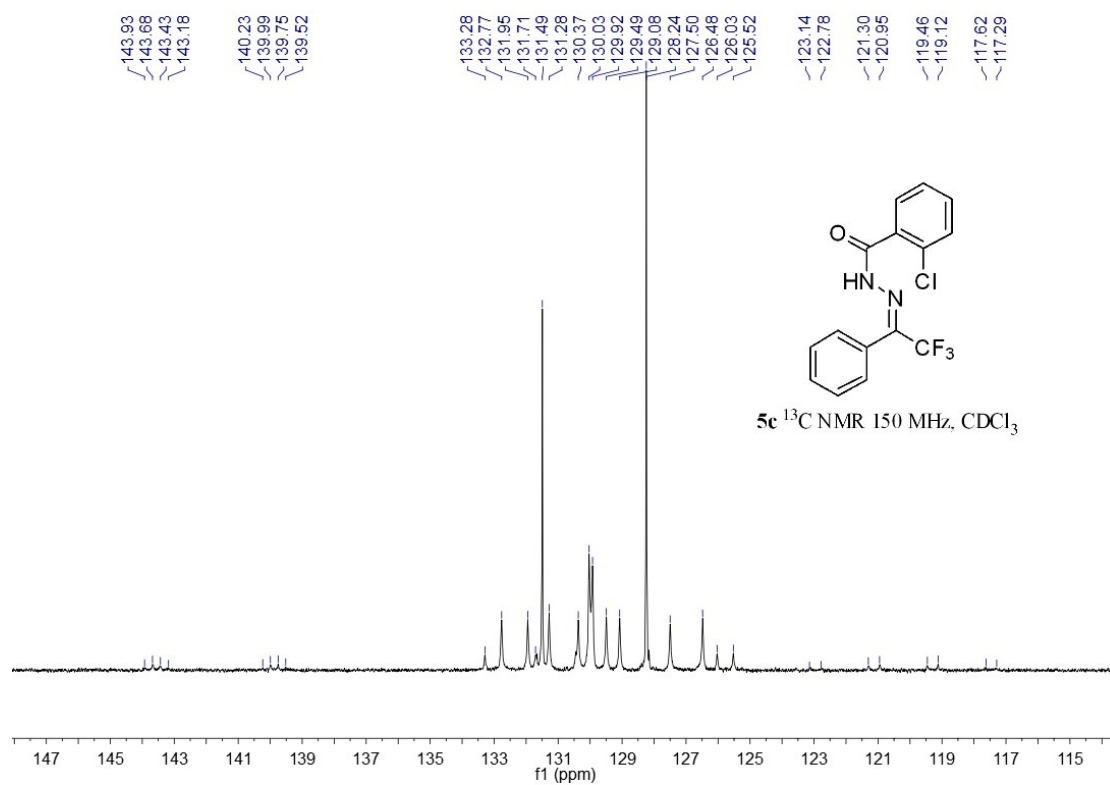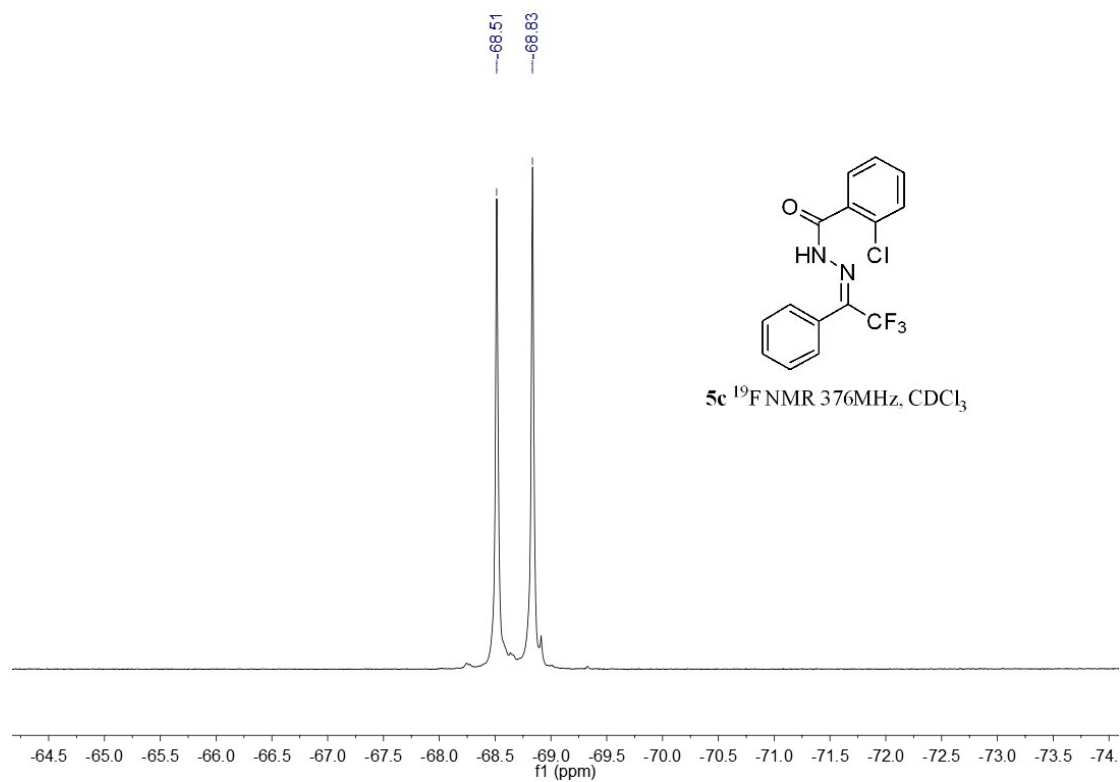

NMR copies of major product of compound **5d**:

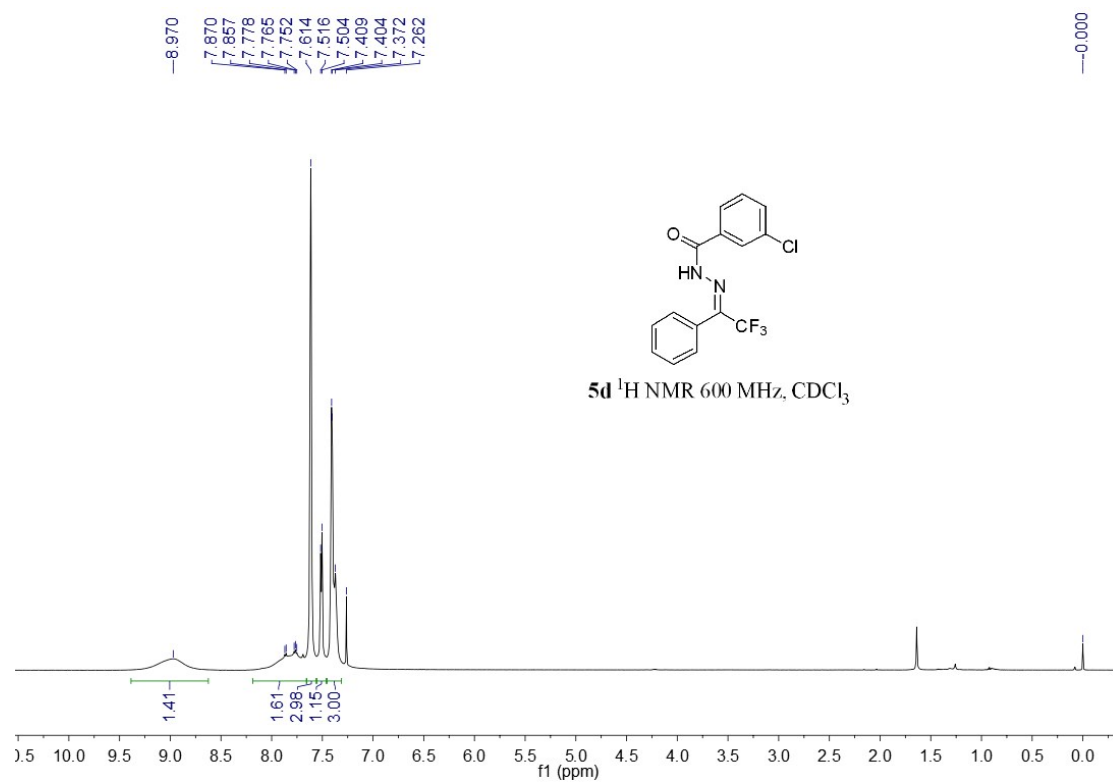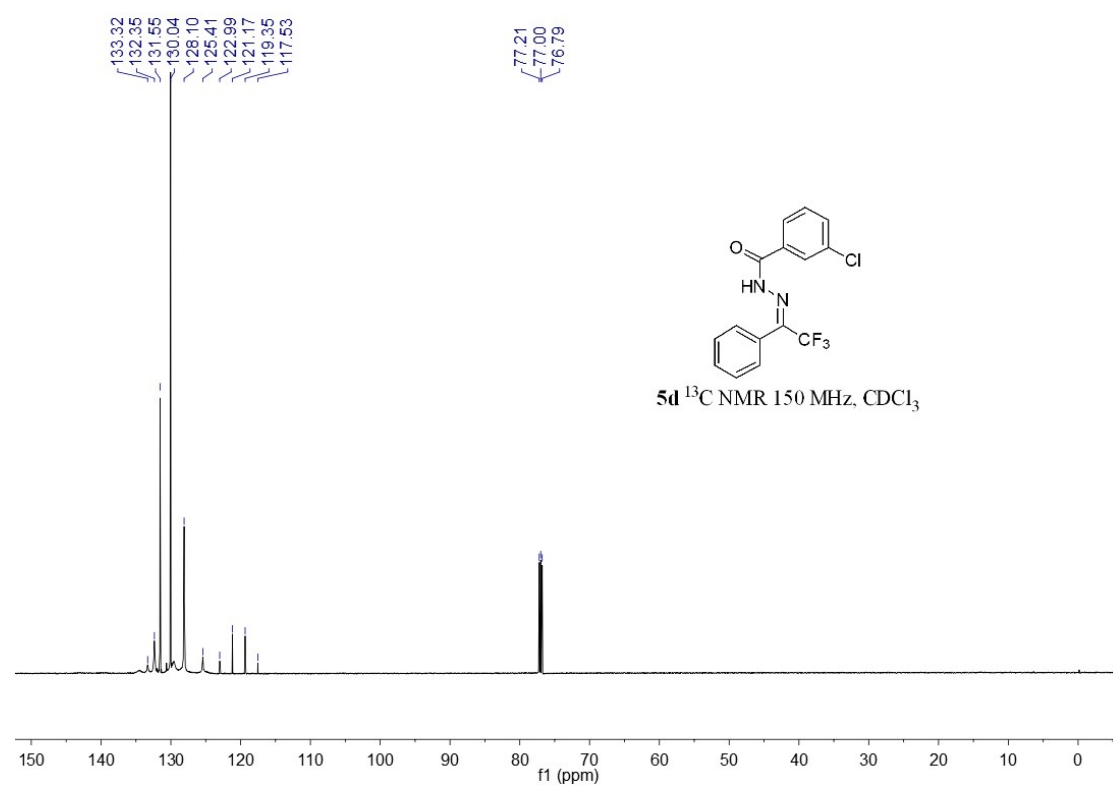



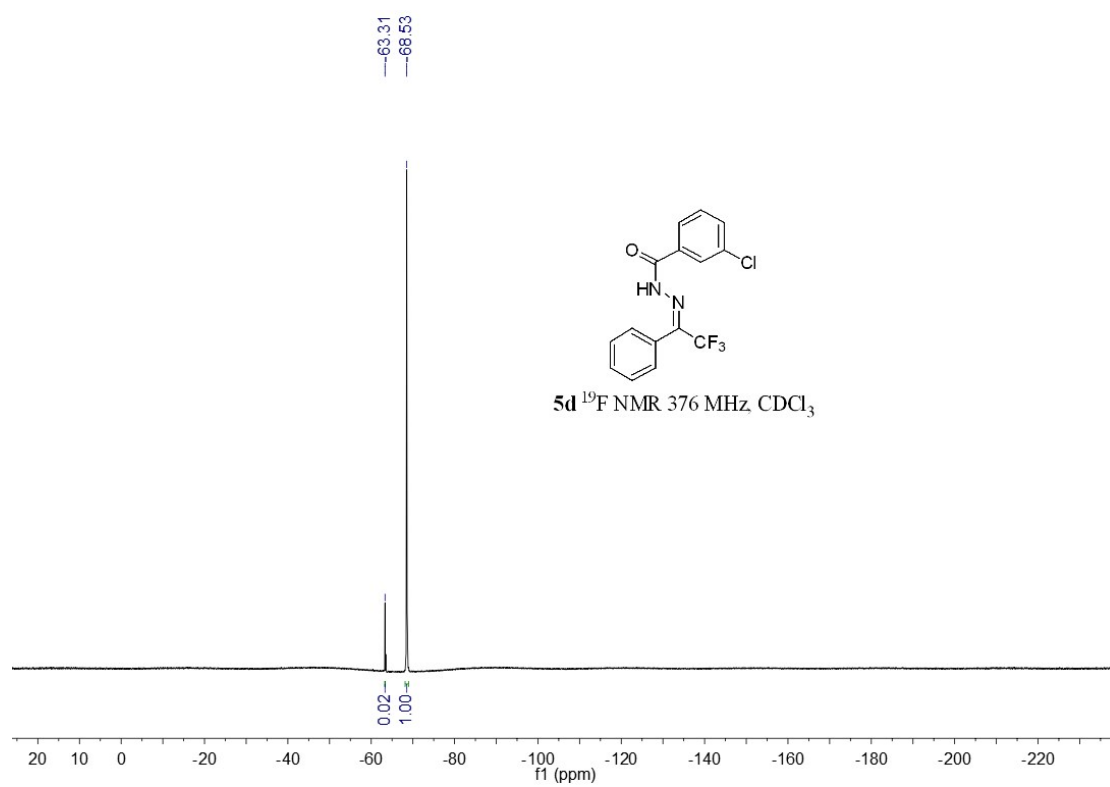

NMR copies of major product of compound **5e**:

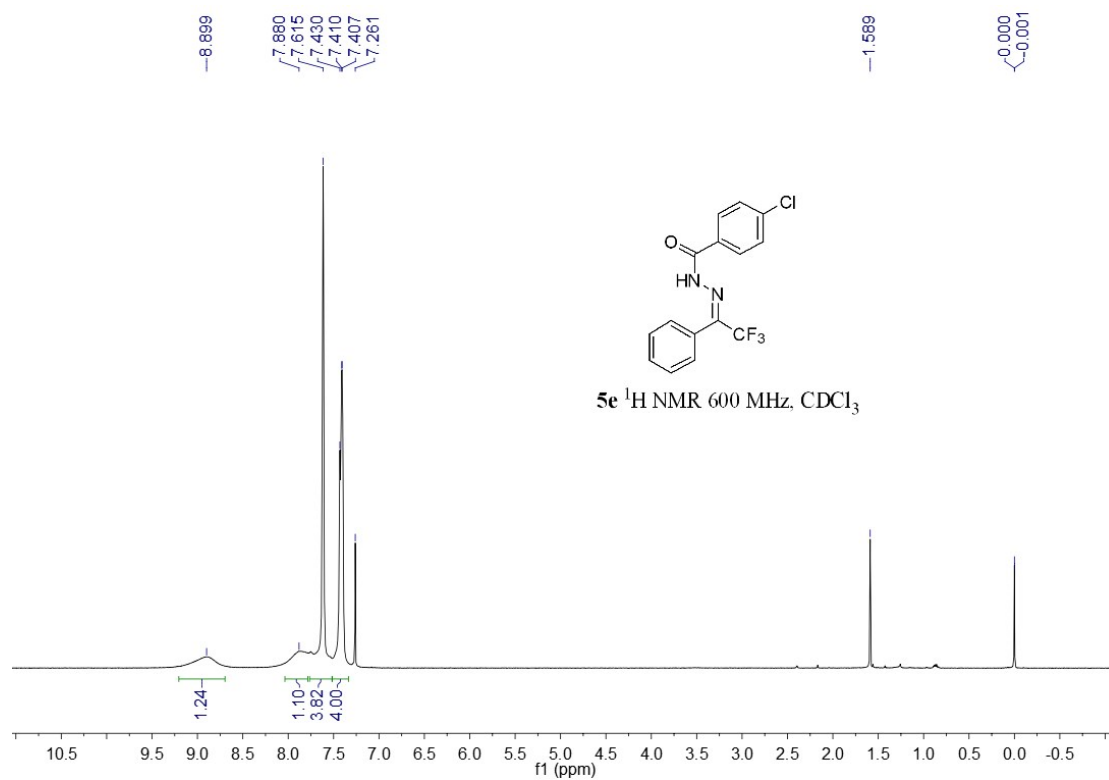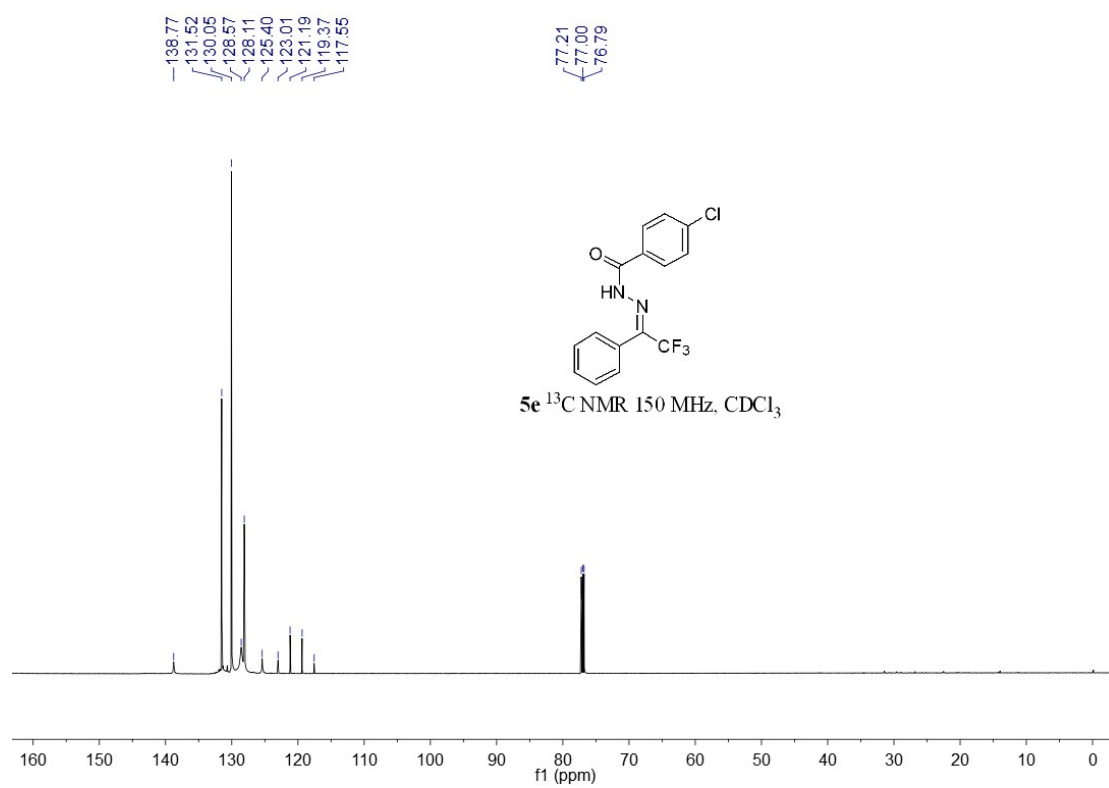

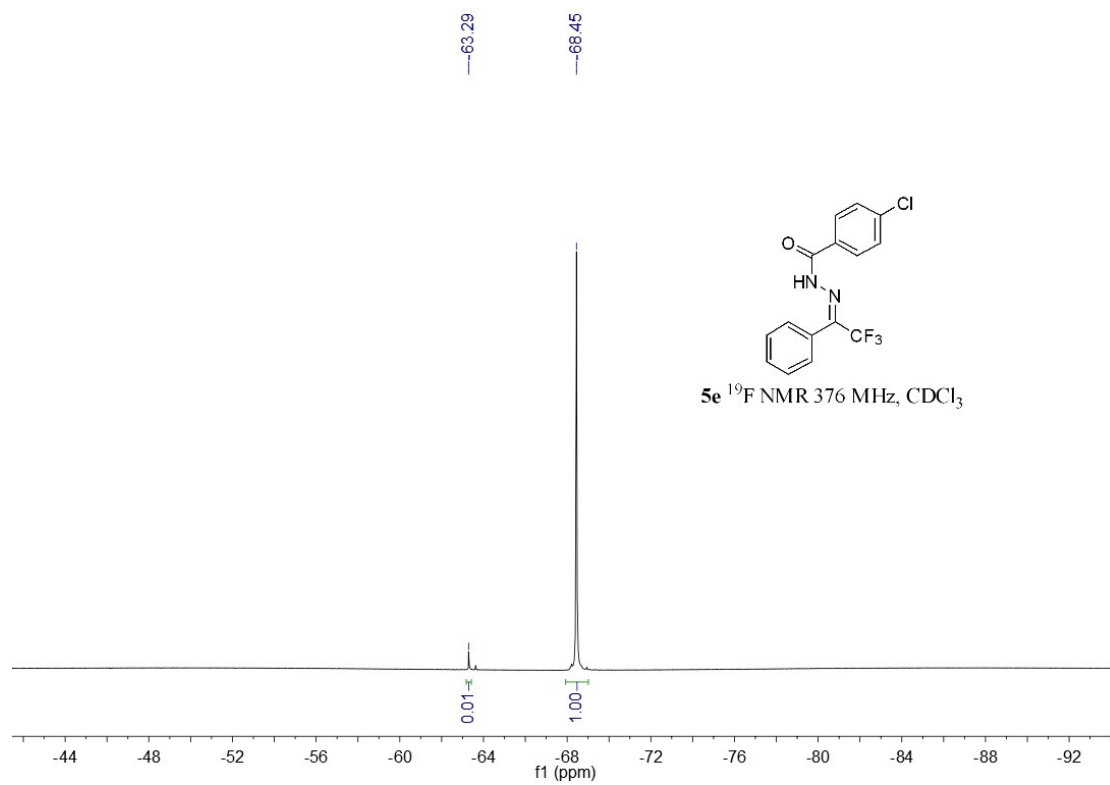

NMR copies of major product of compound **5f**:

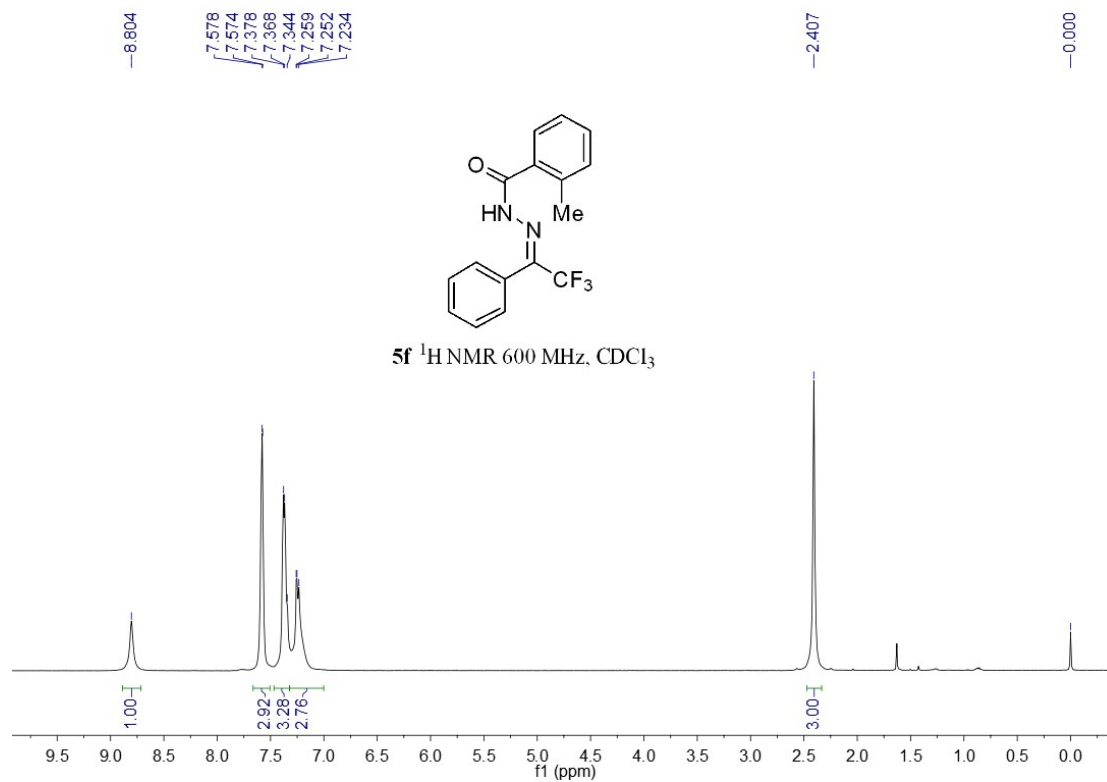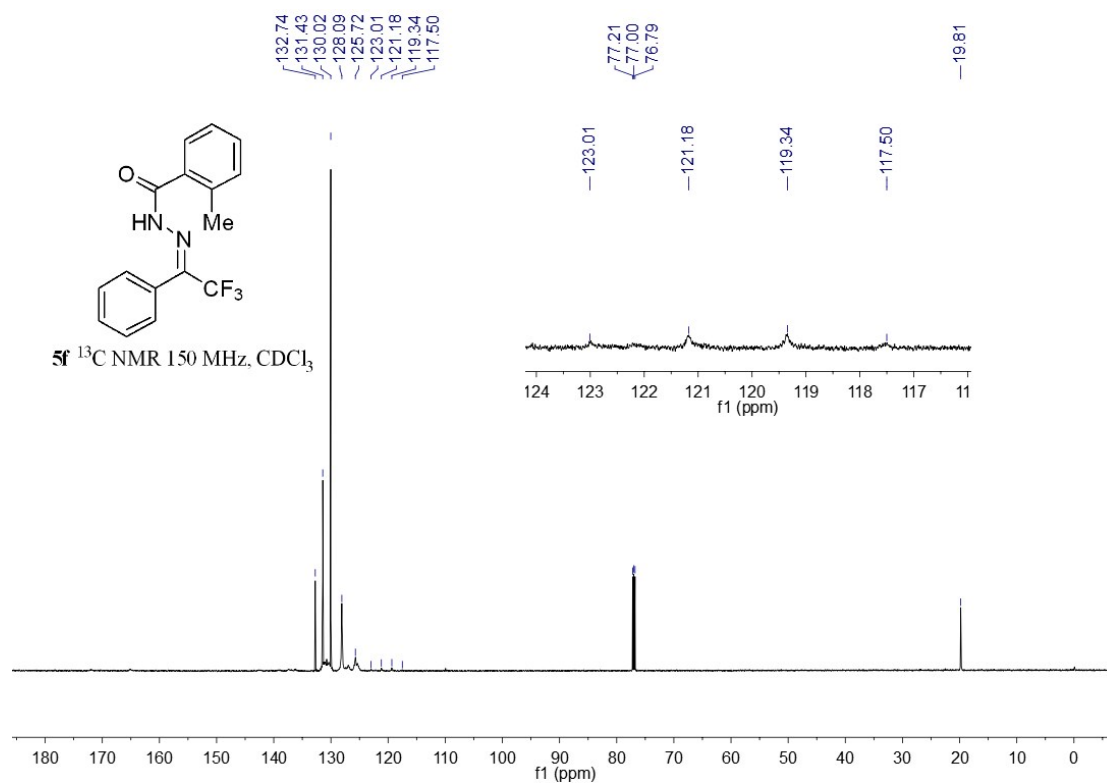

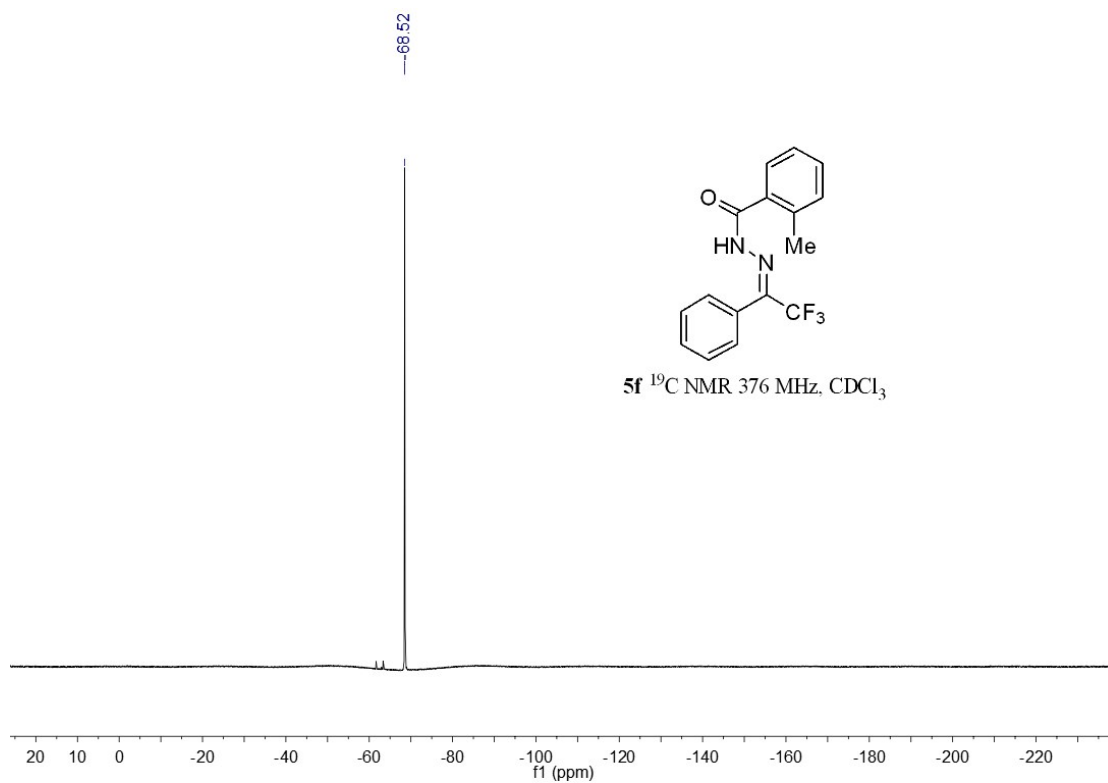

NMR copies of major product of compound **5g**:

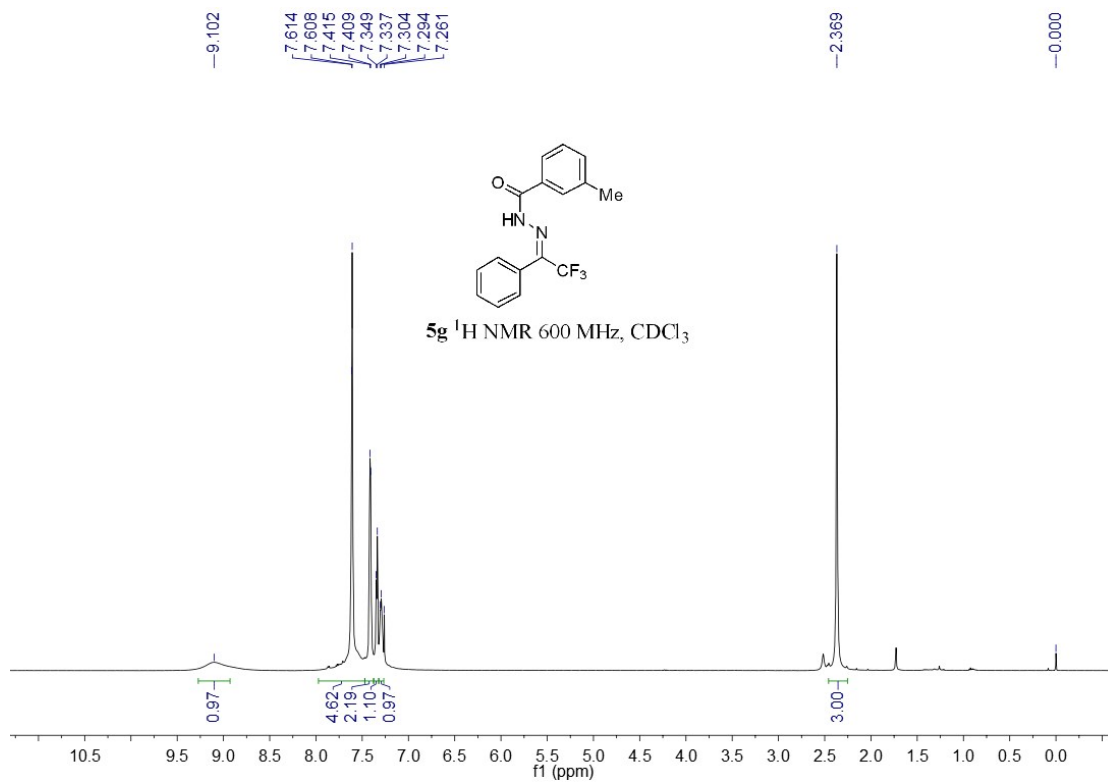

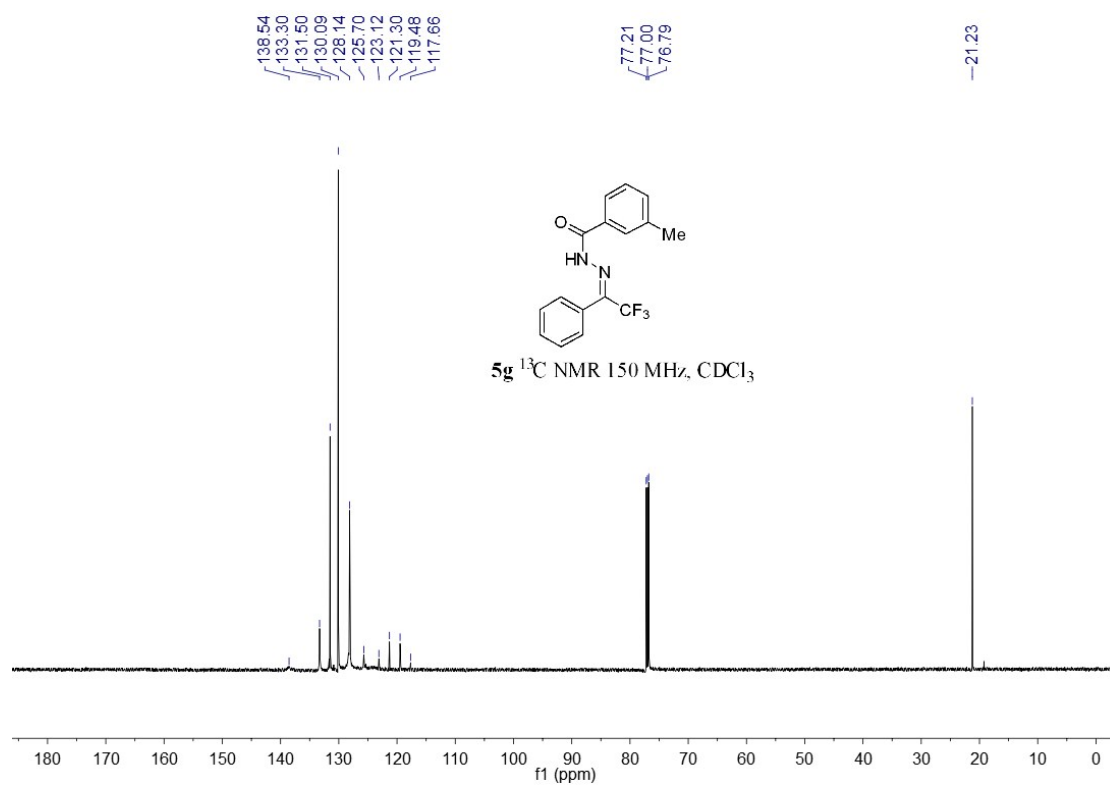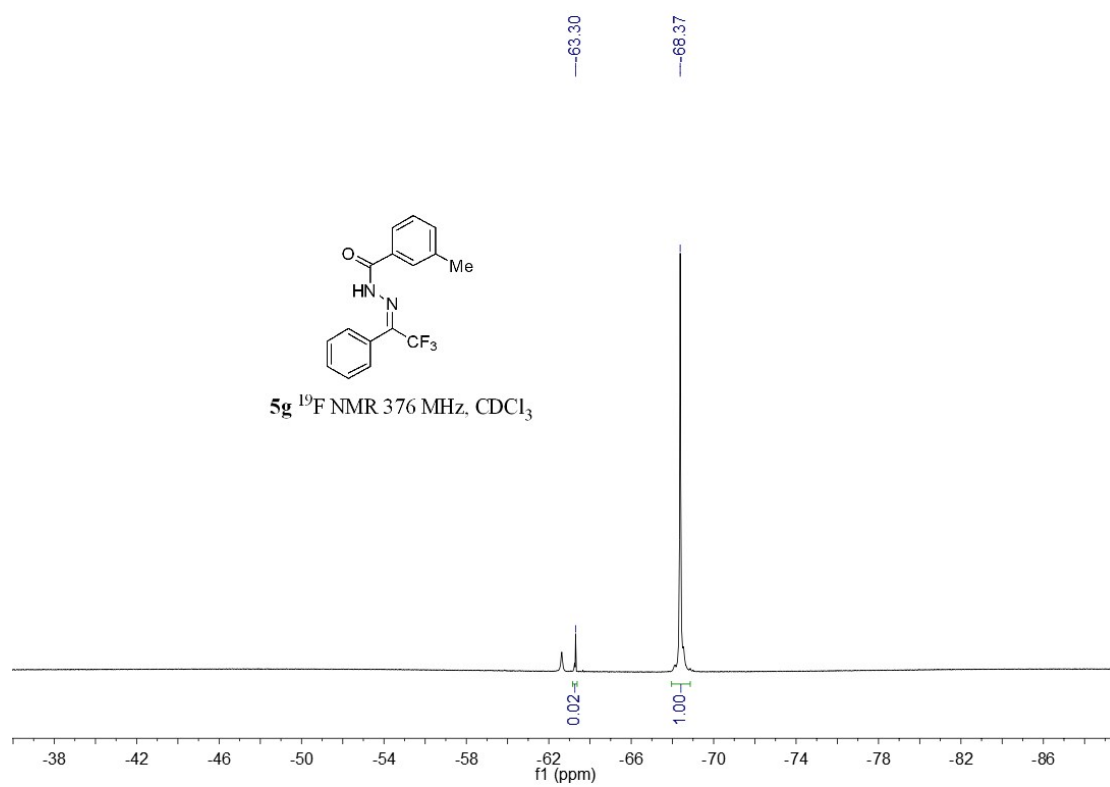

NMR copies of major product of compound **5h**:

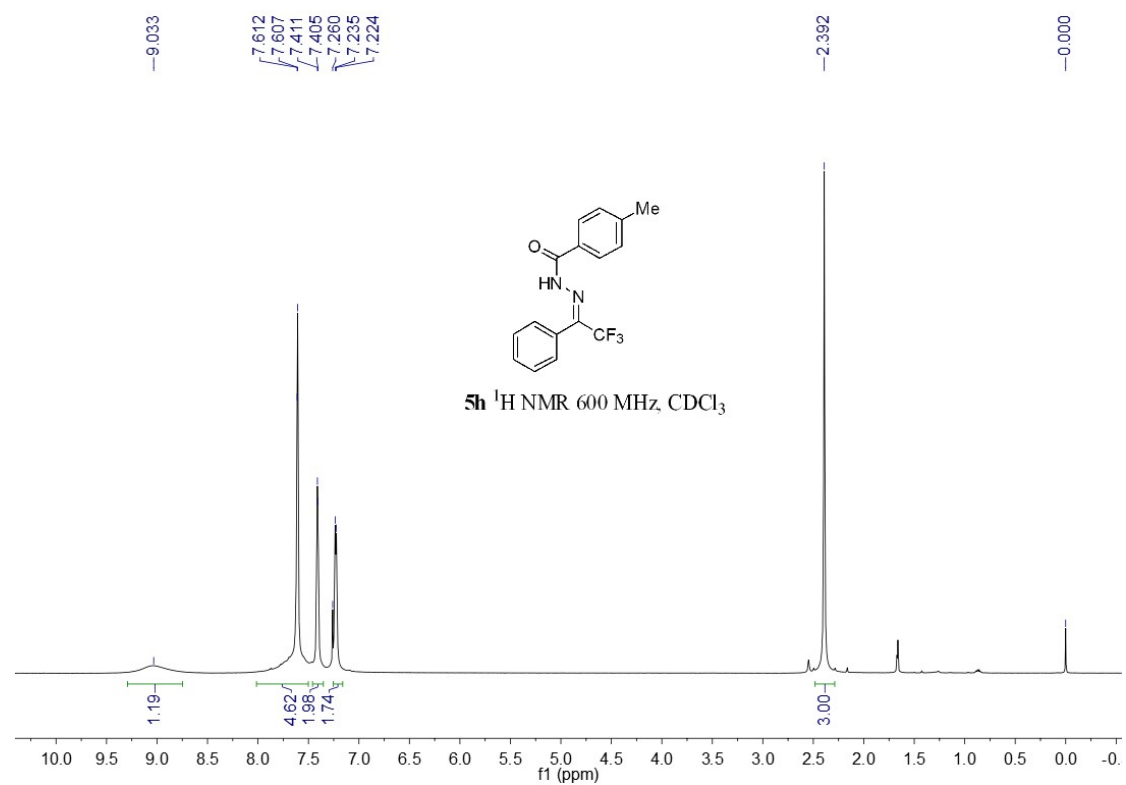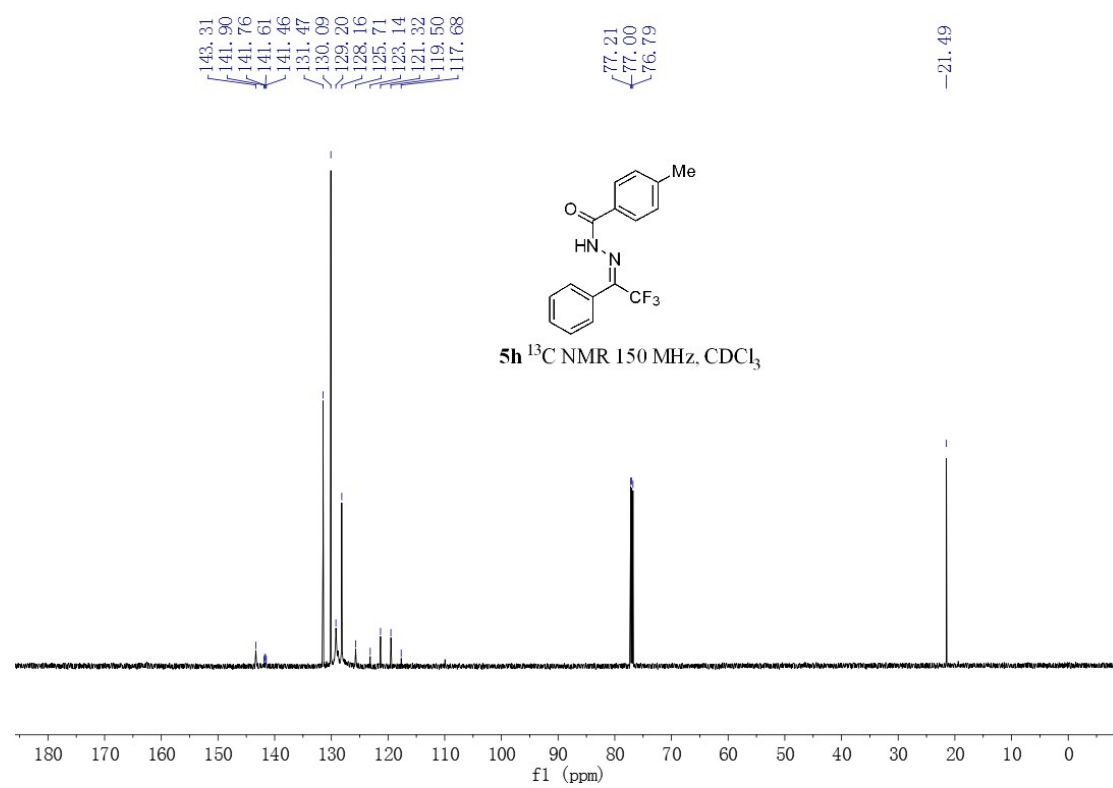

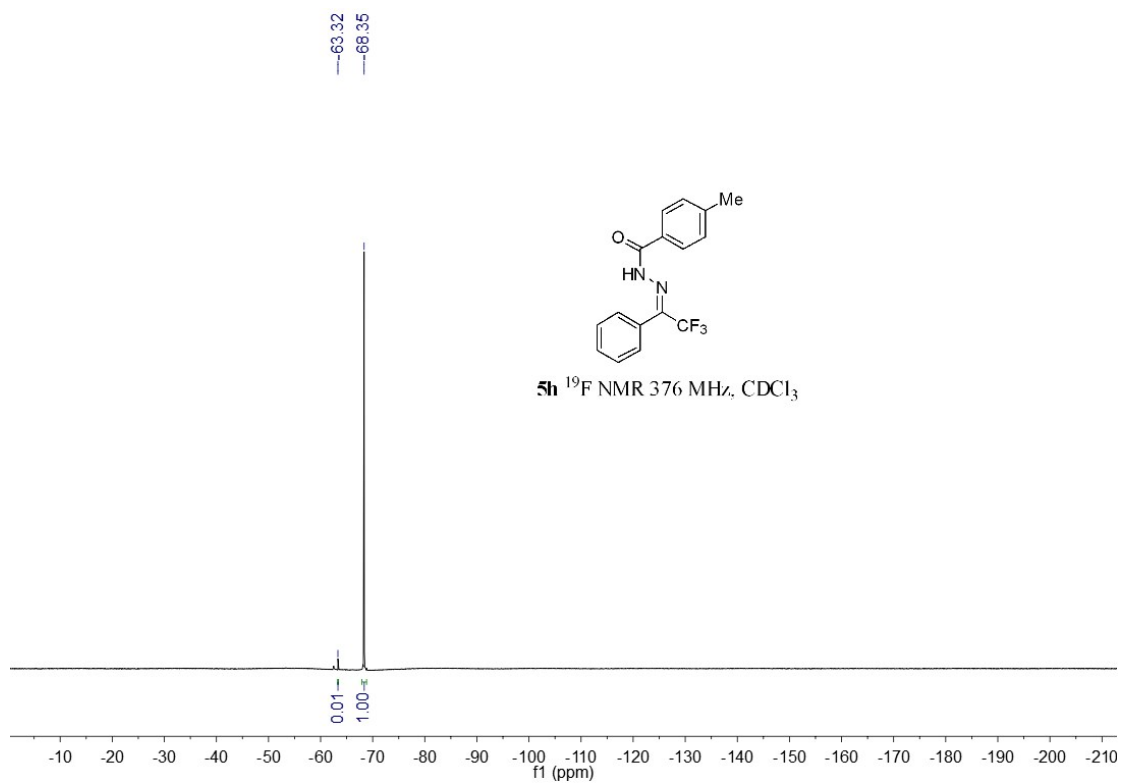

NMR copies of major product of compound **5i**:

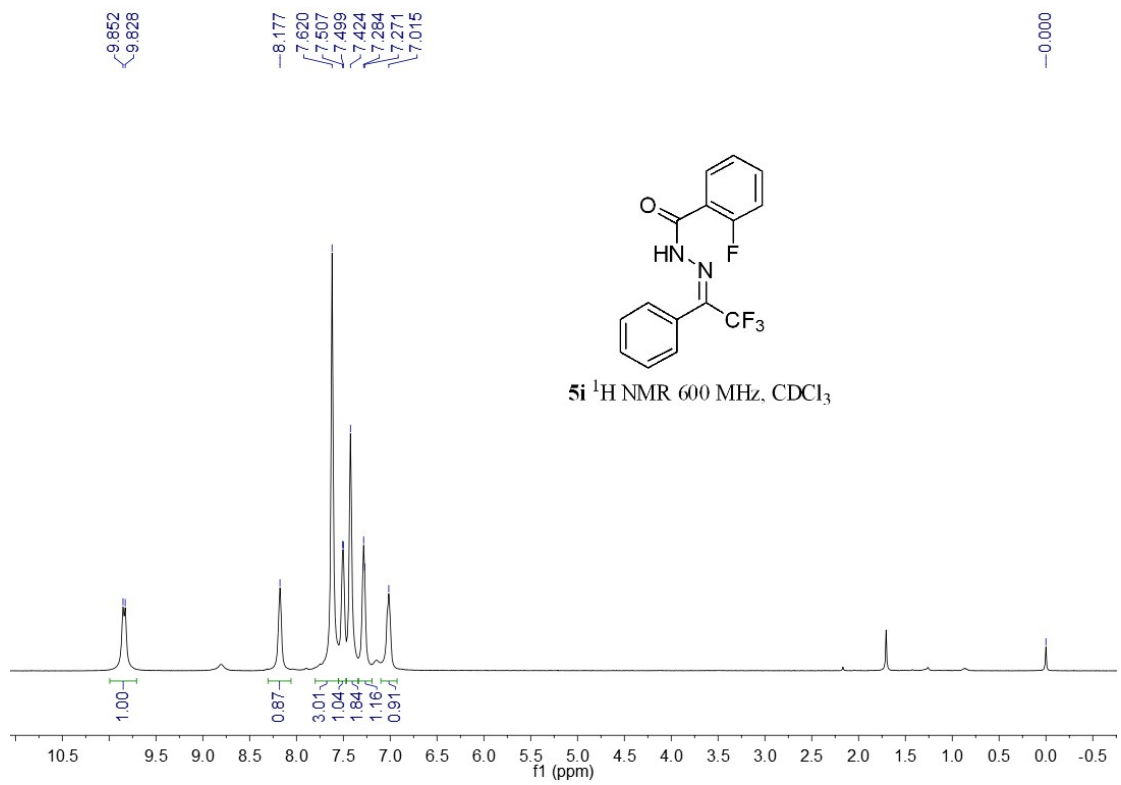



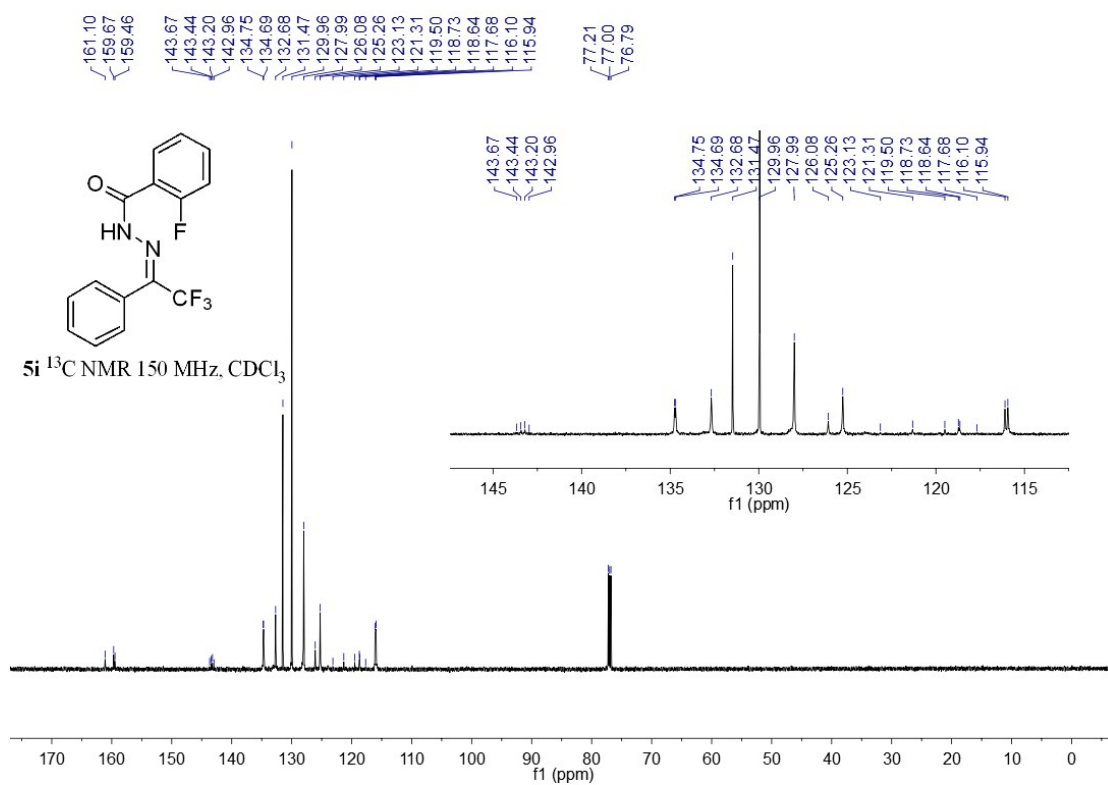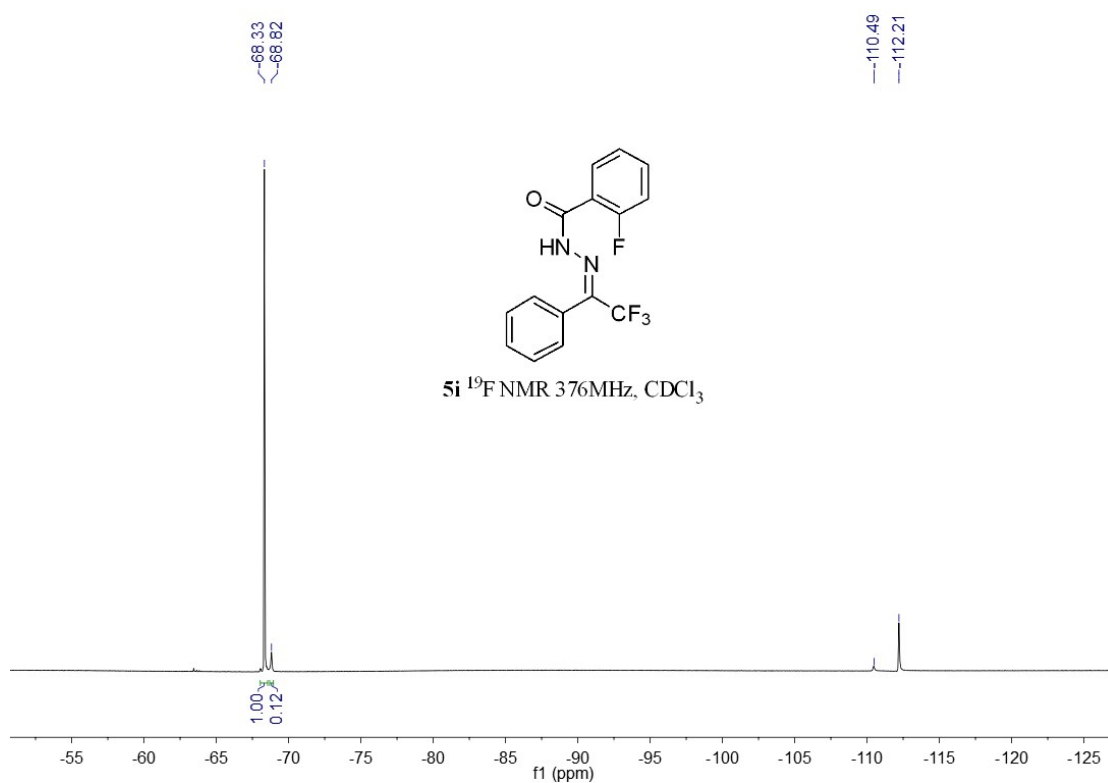

NMR copies of major product of compound **5j**:

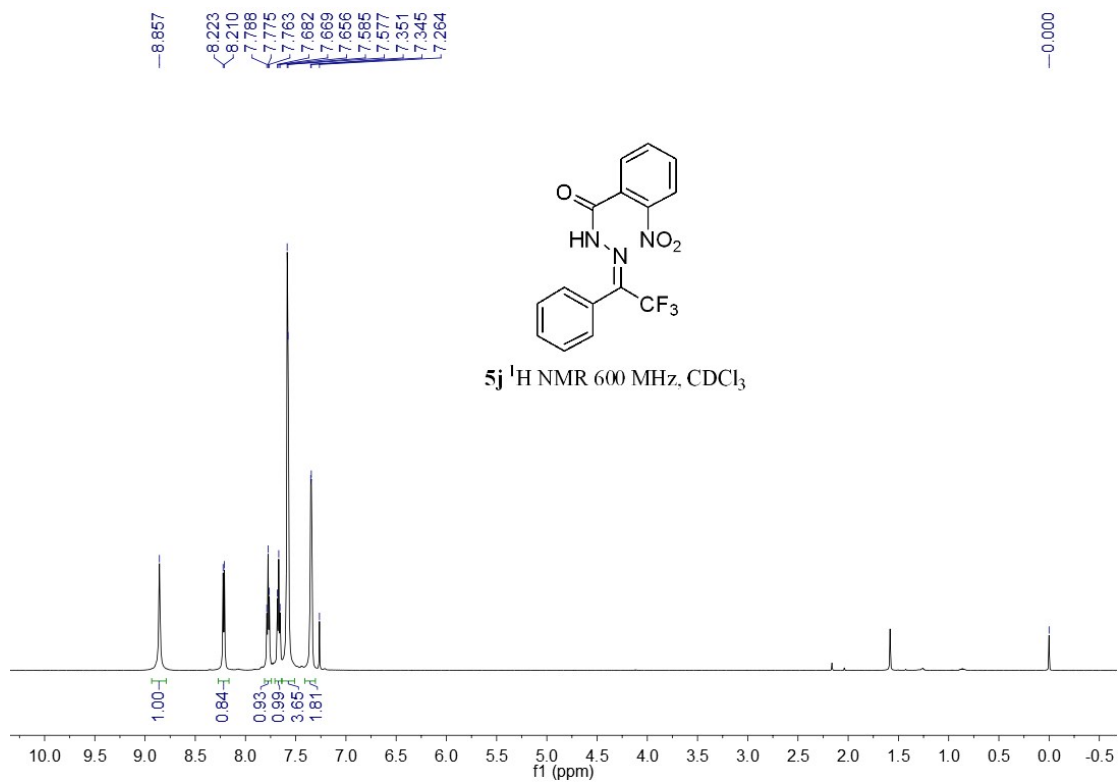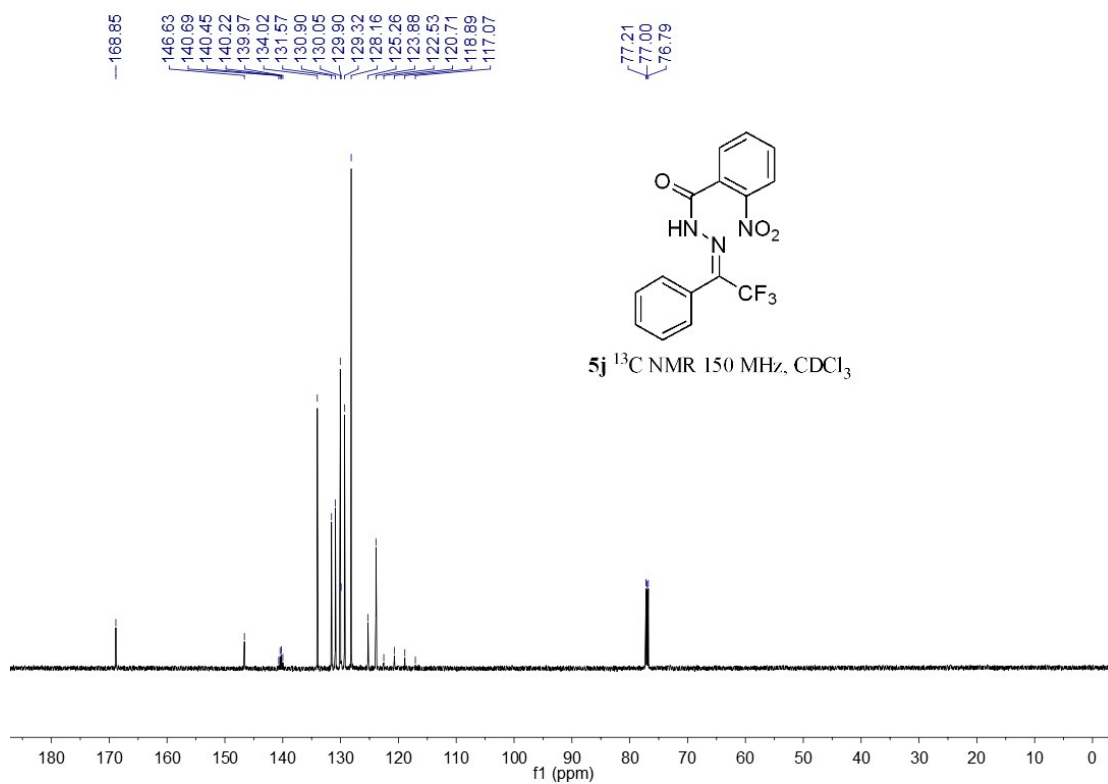

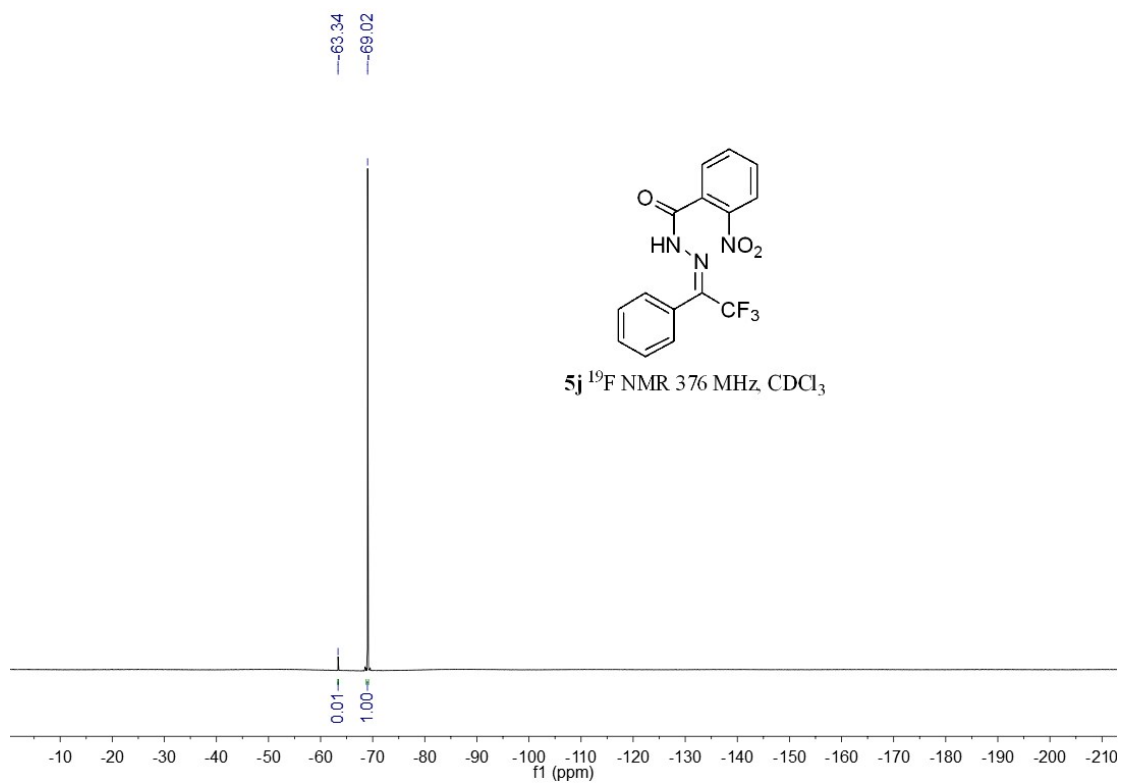

NMR copies of major product of compound **5k**:

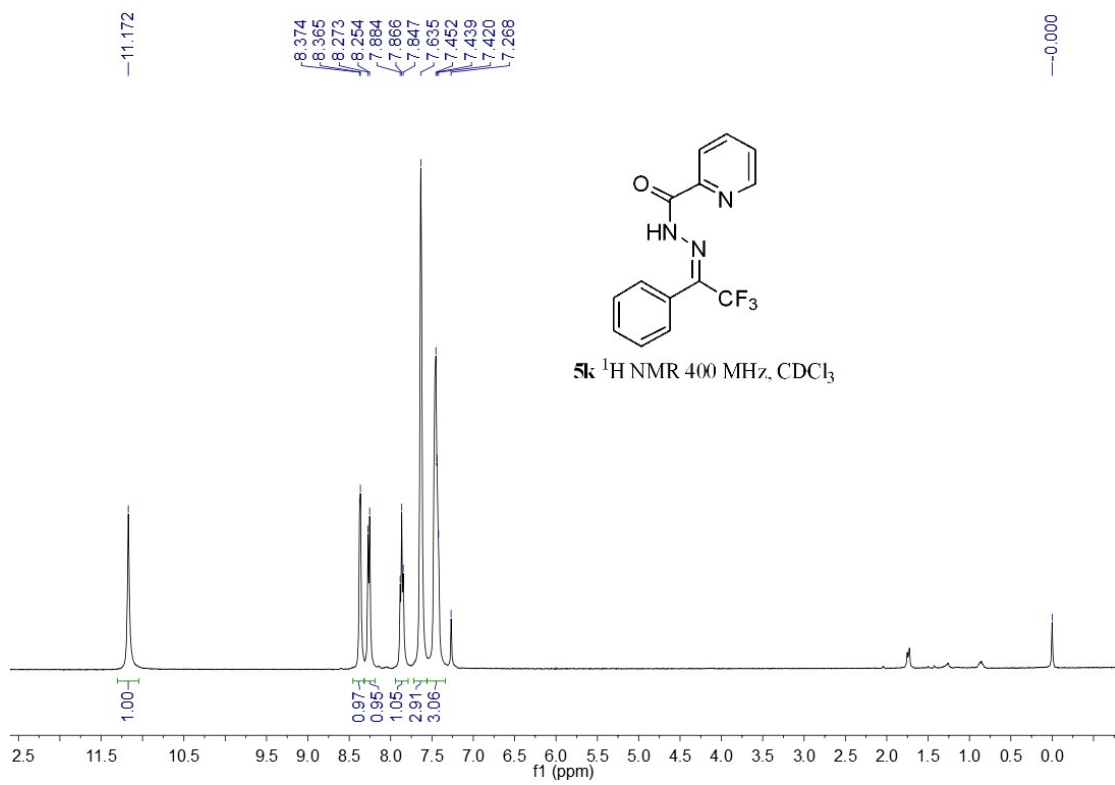

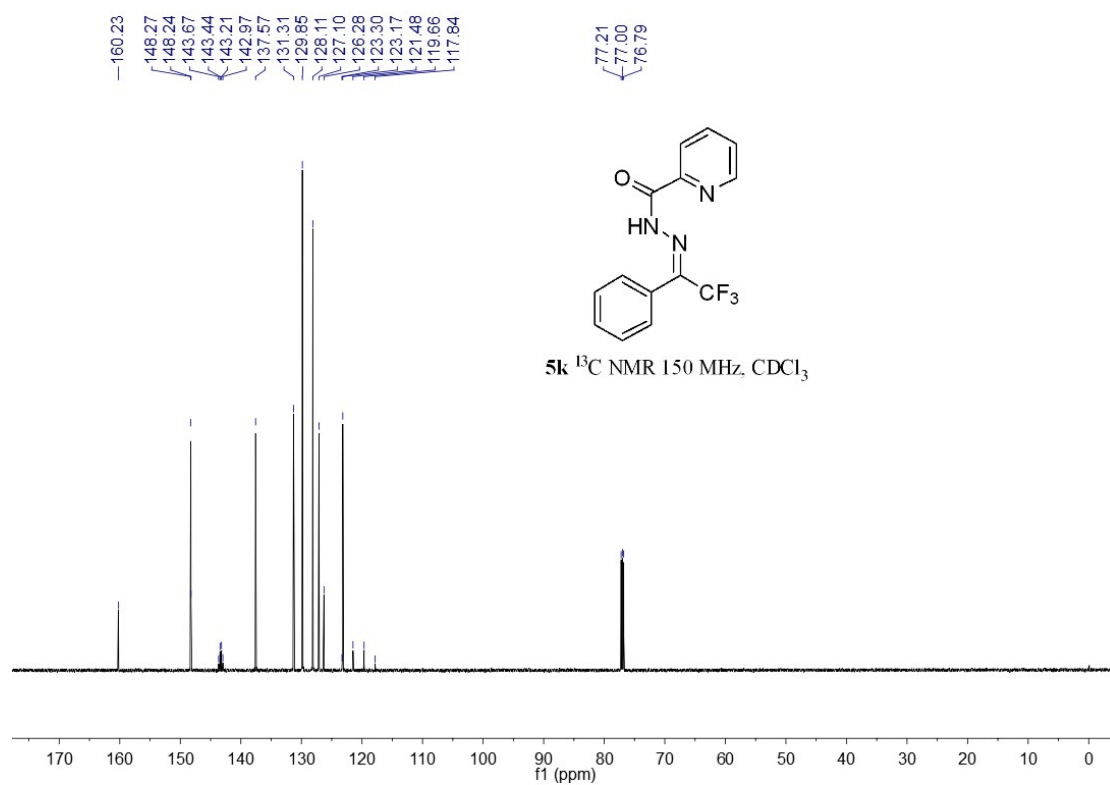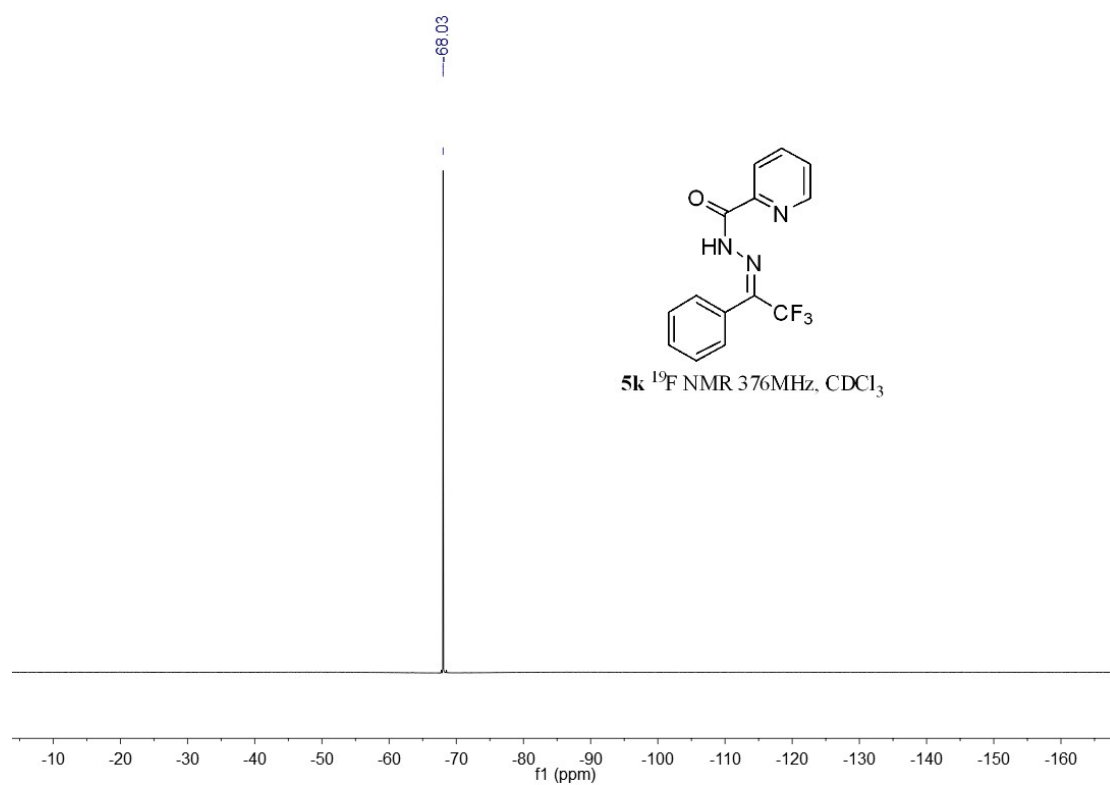

NMR copies of major product of compound **5l**:

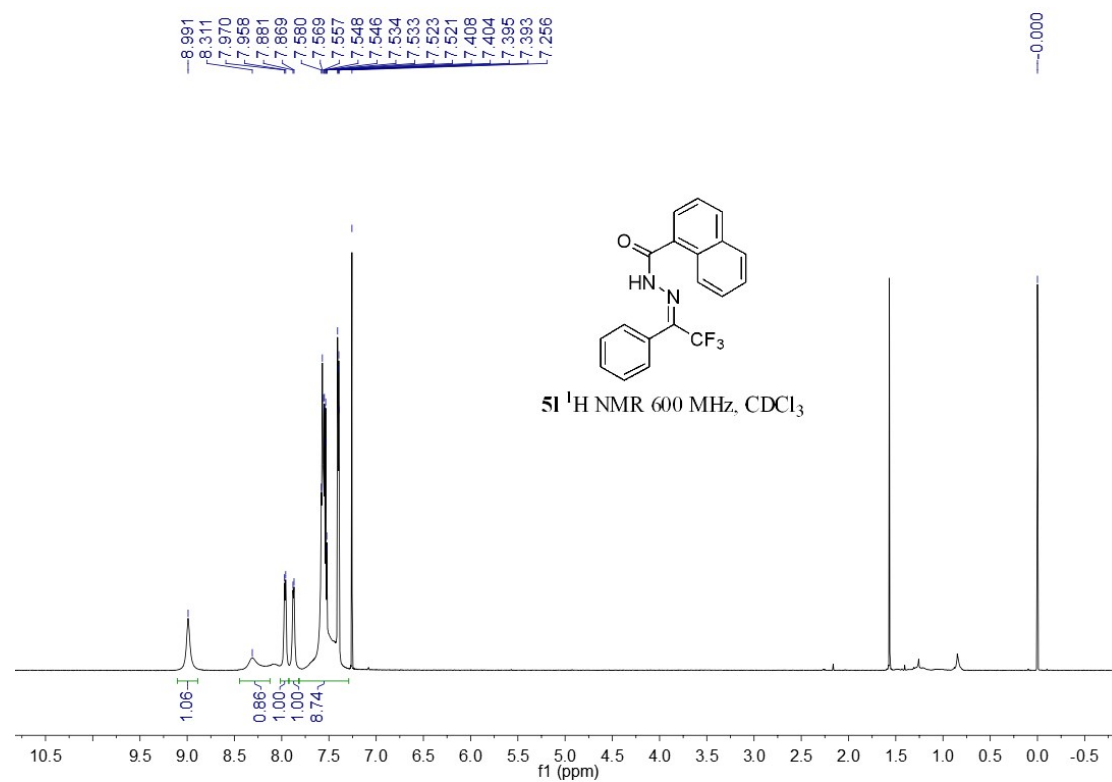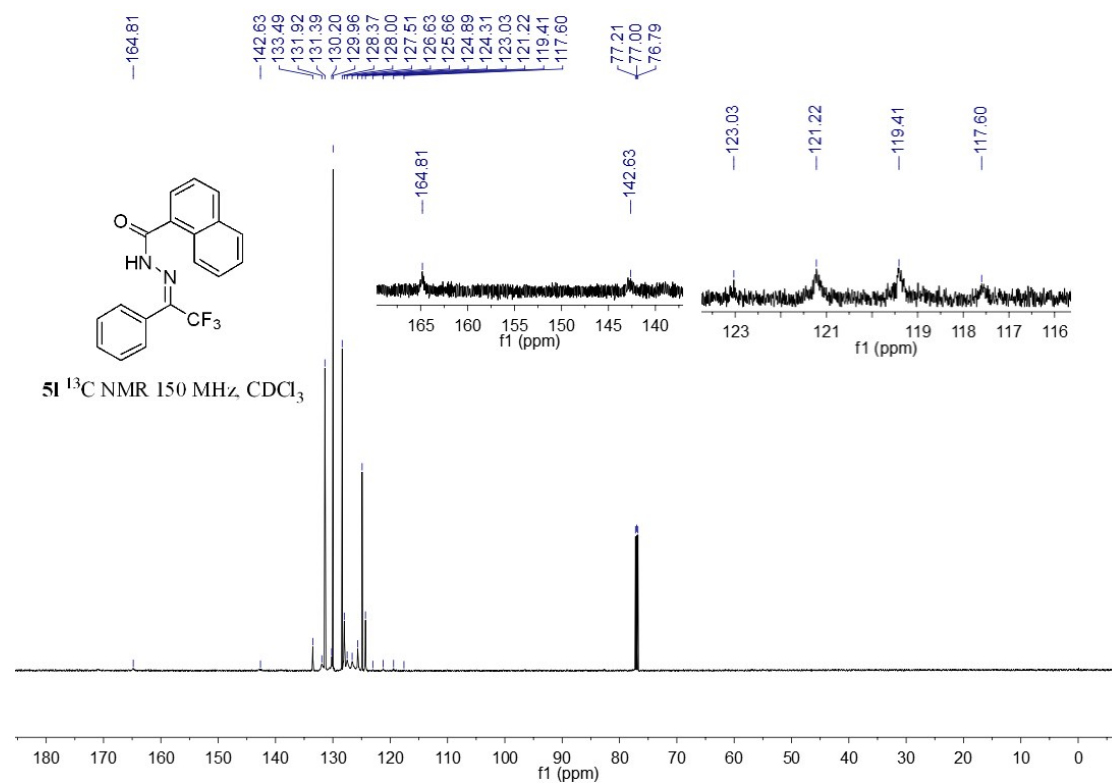

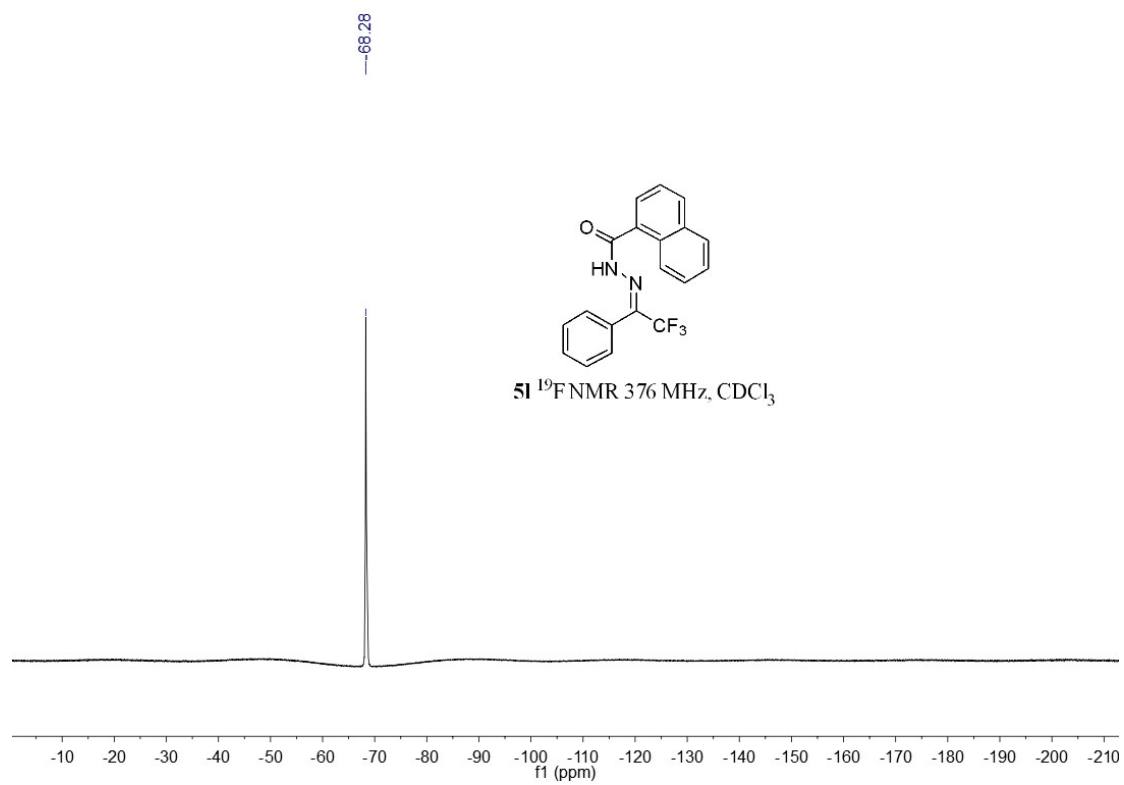

NMR copies of major product of compound **5m**:

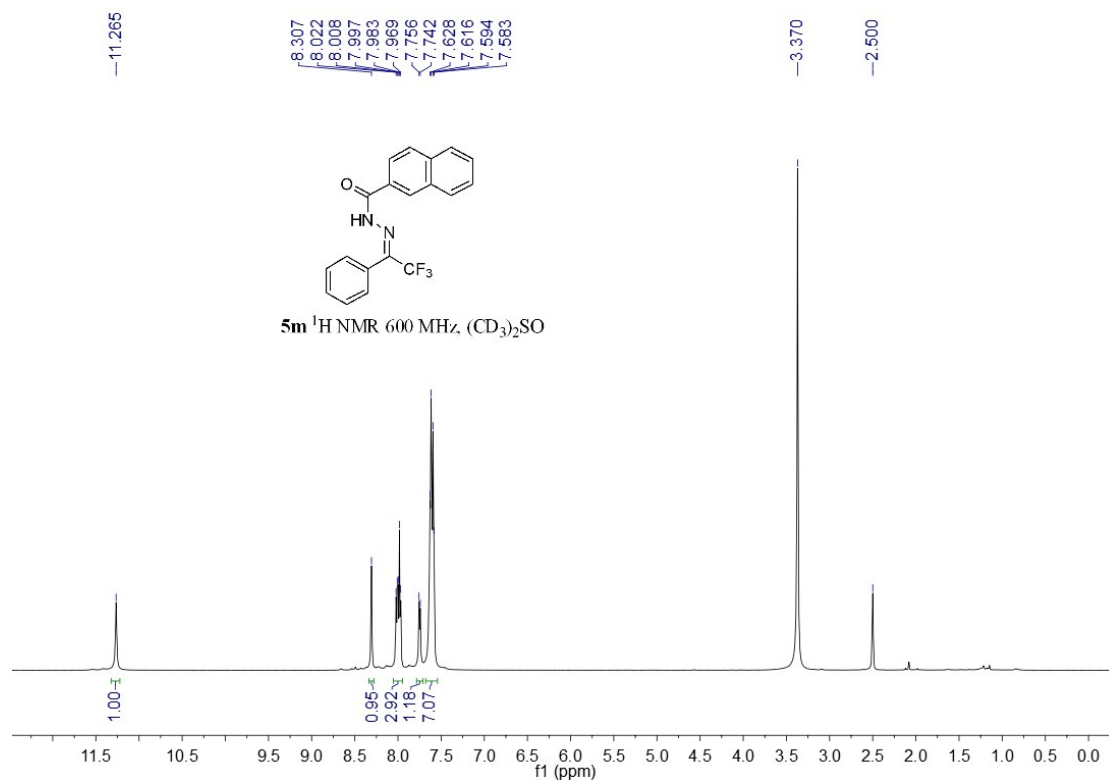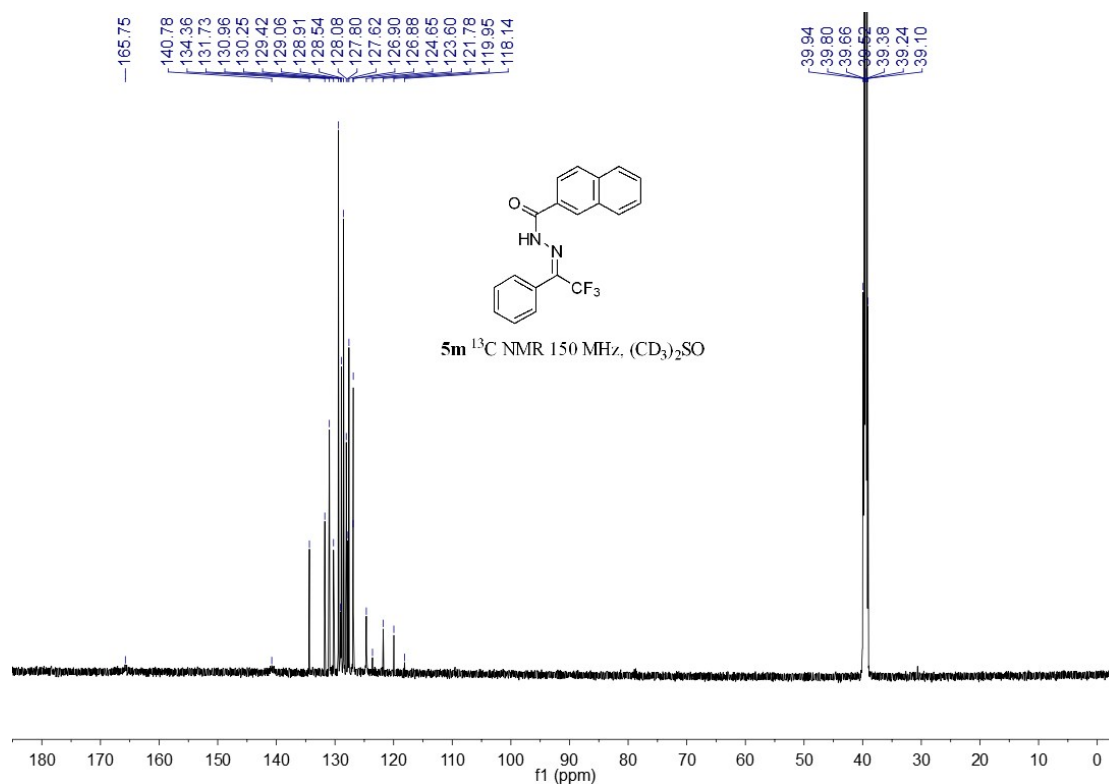

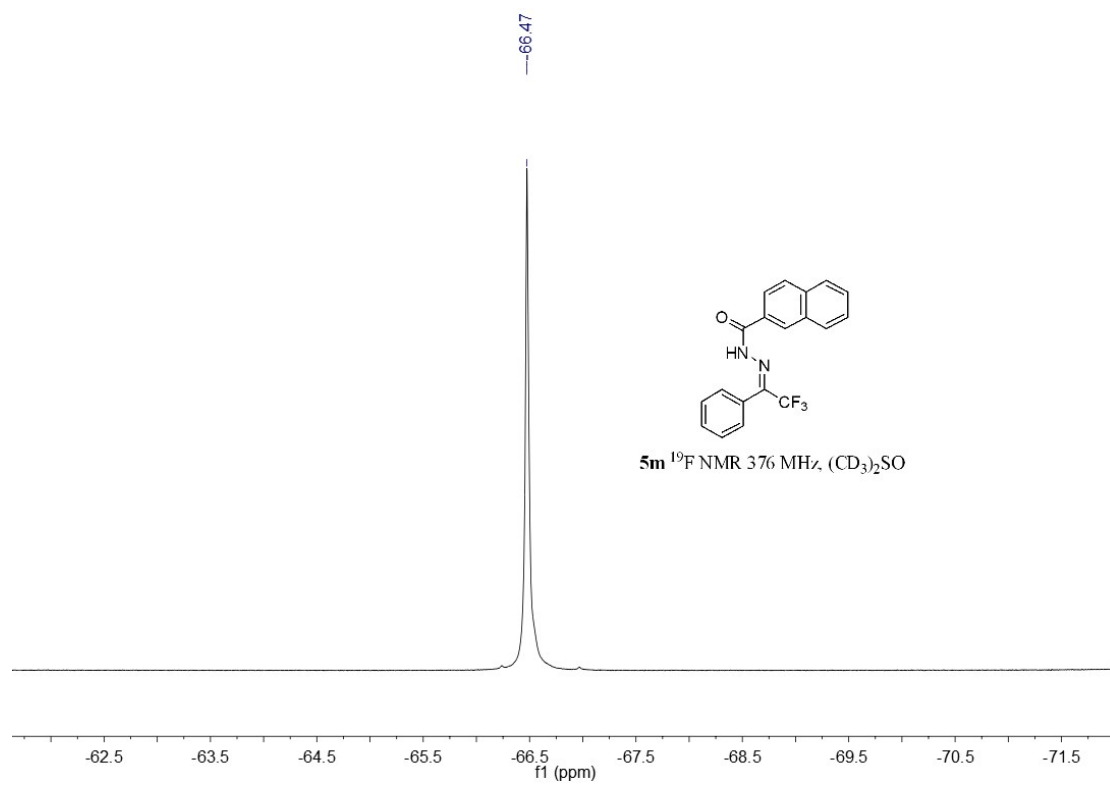



NMR copies of major product of compound **5n**:

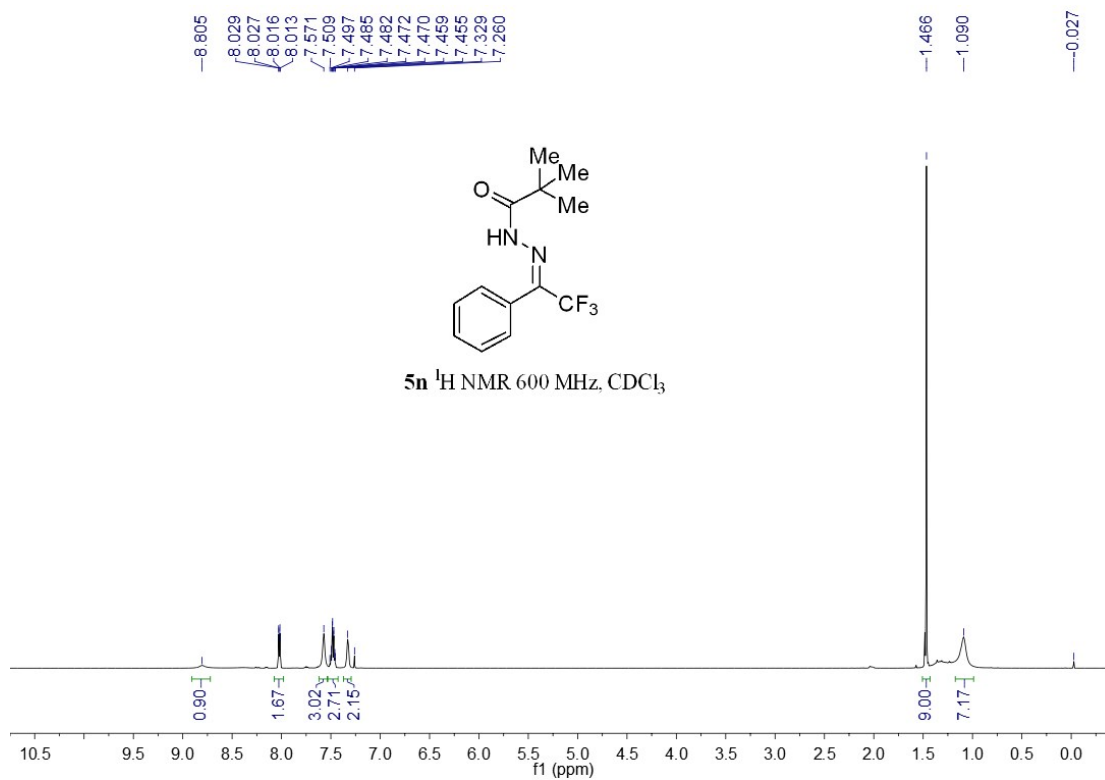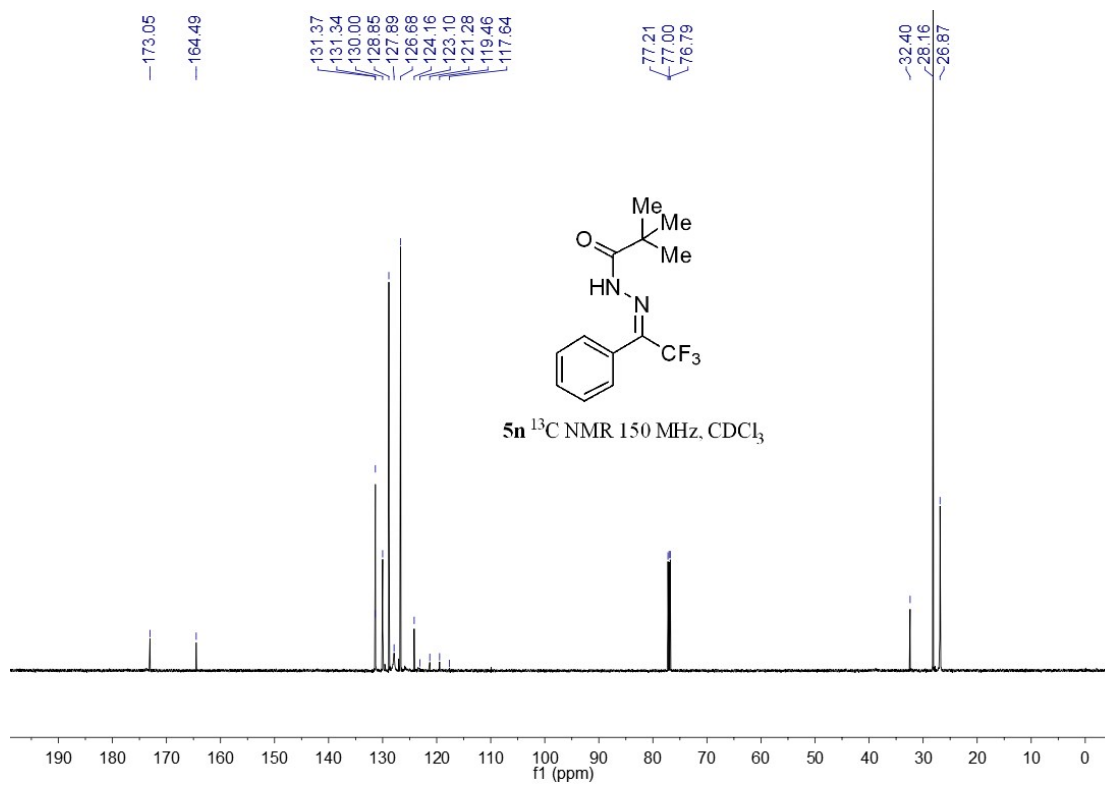

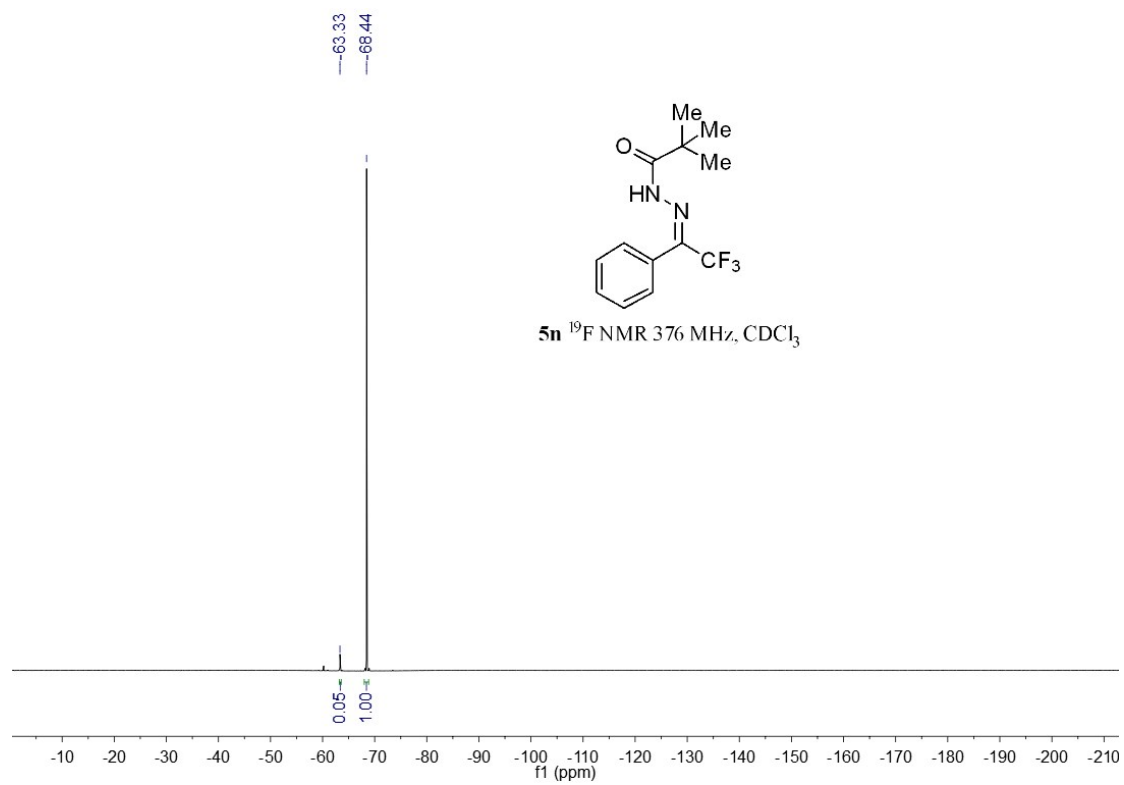

NMR copies of major product of compound **5o**:

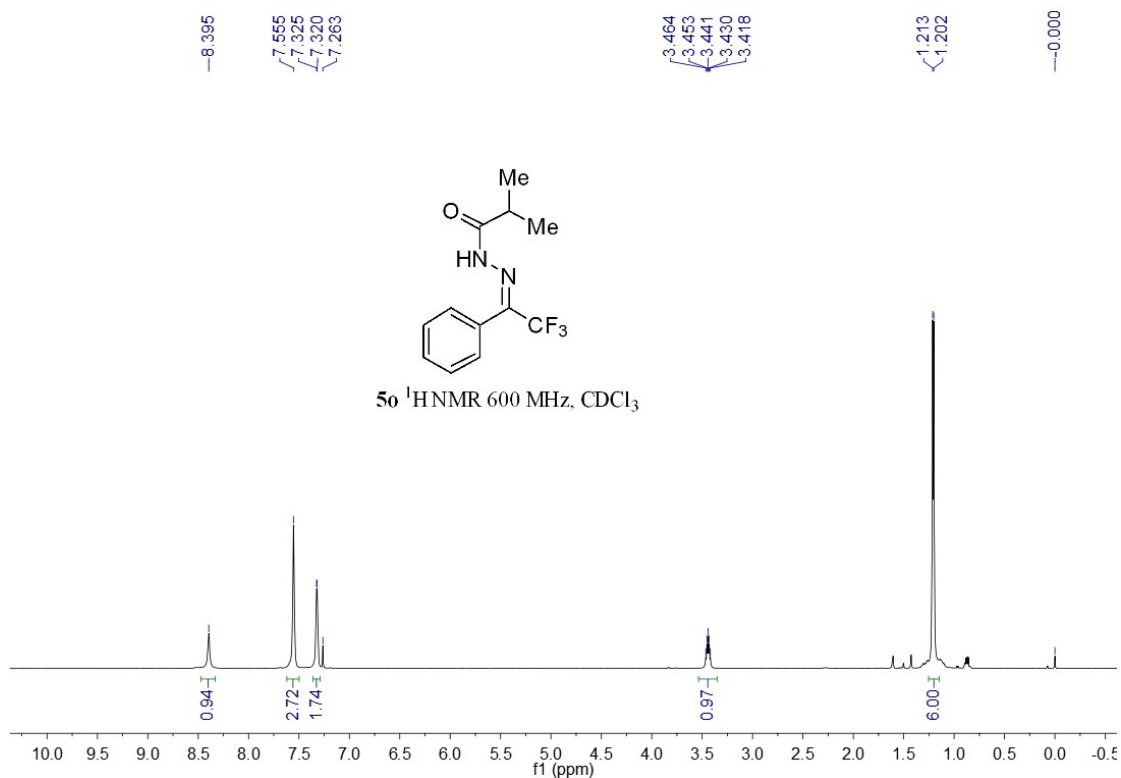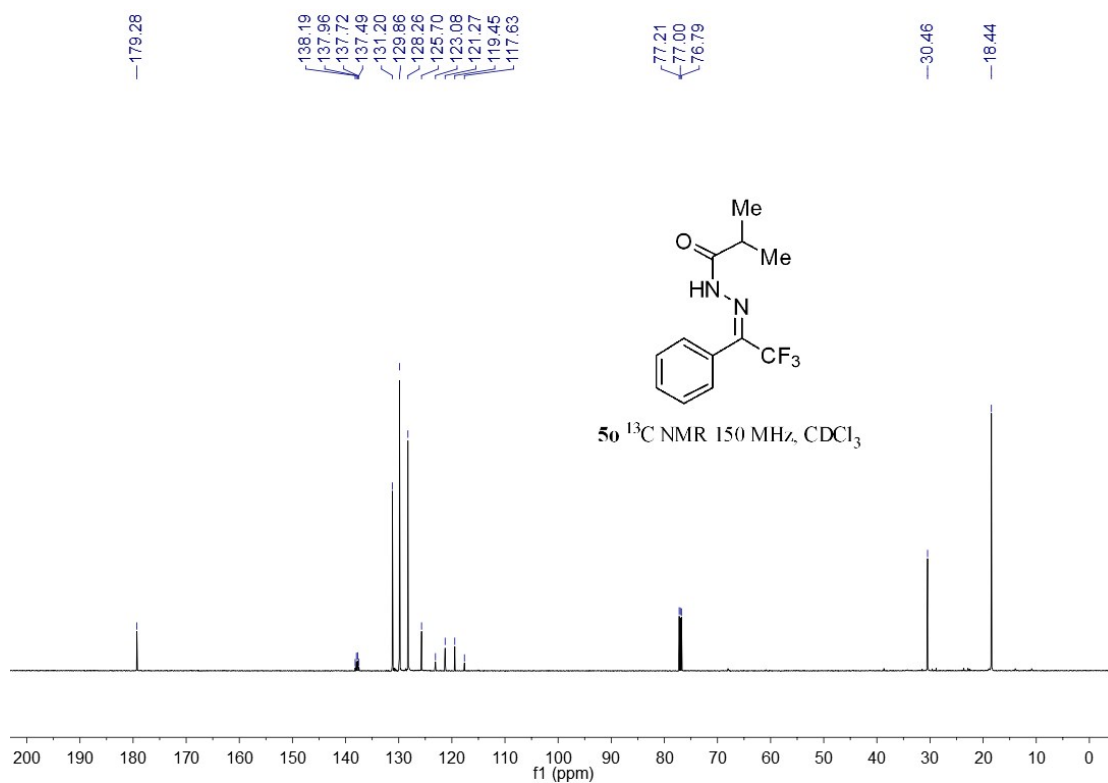

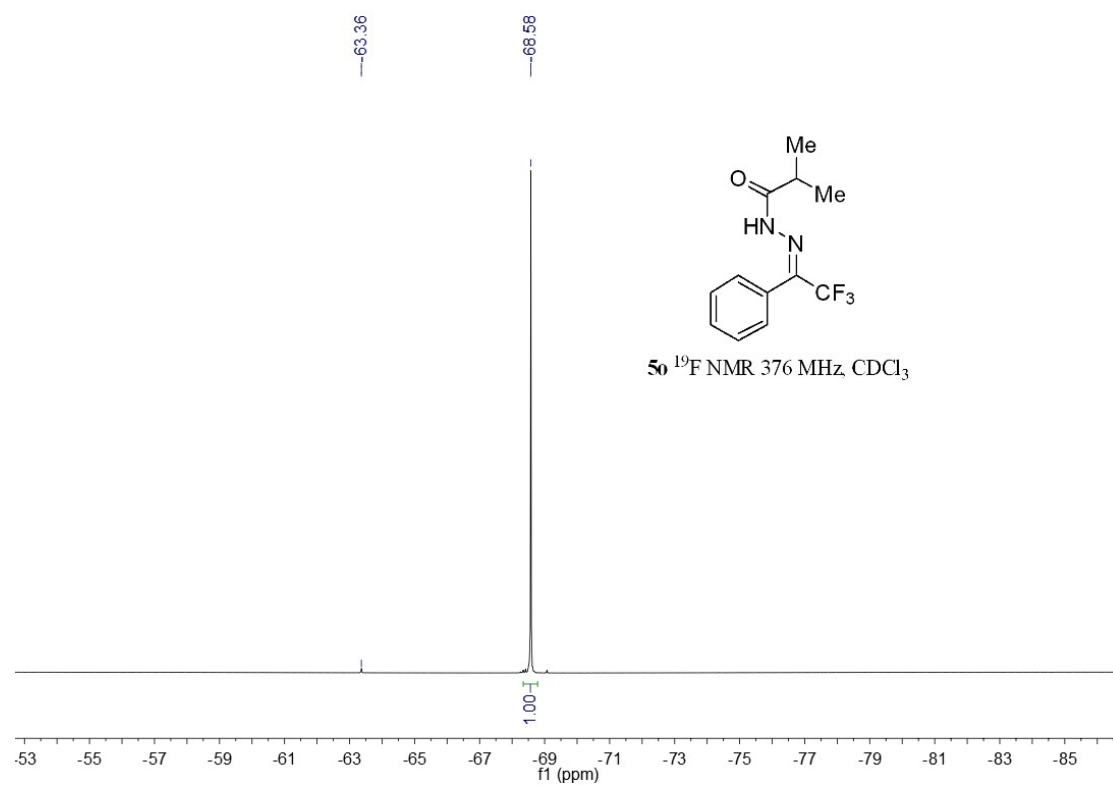

NMR copies of major product of compound **5p**:

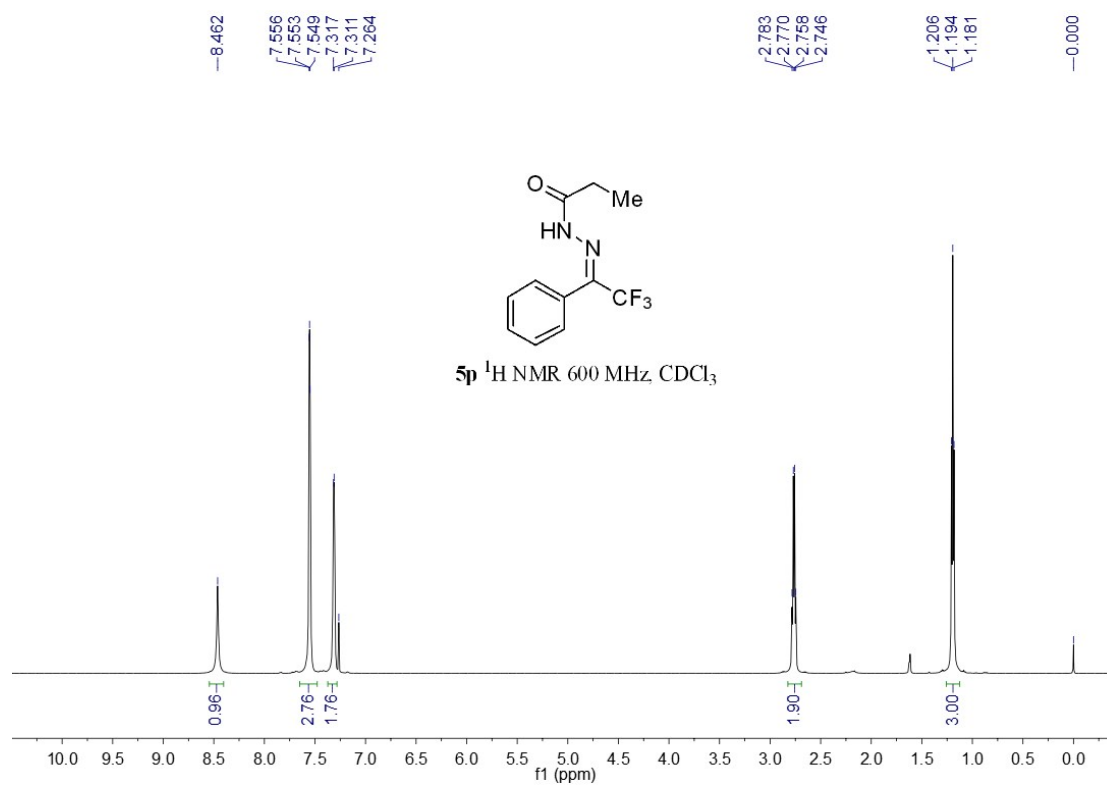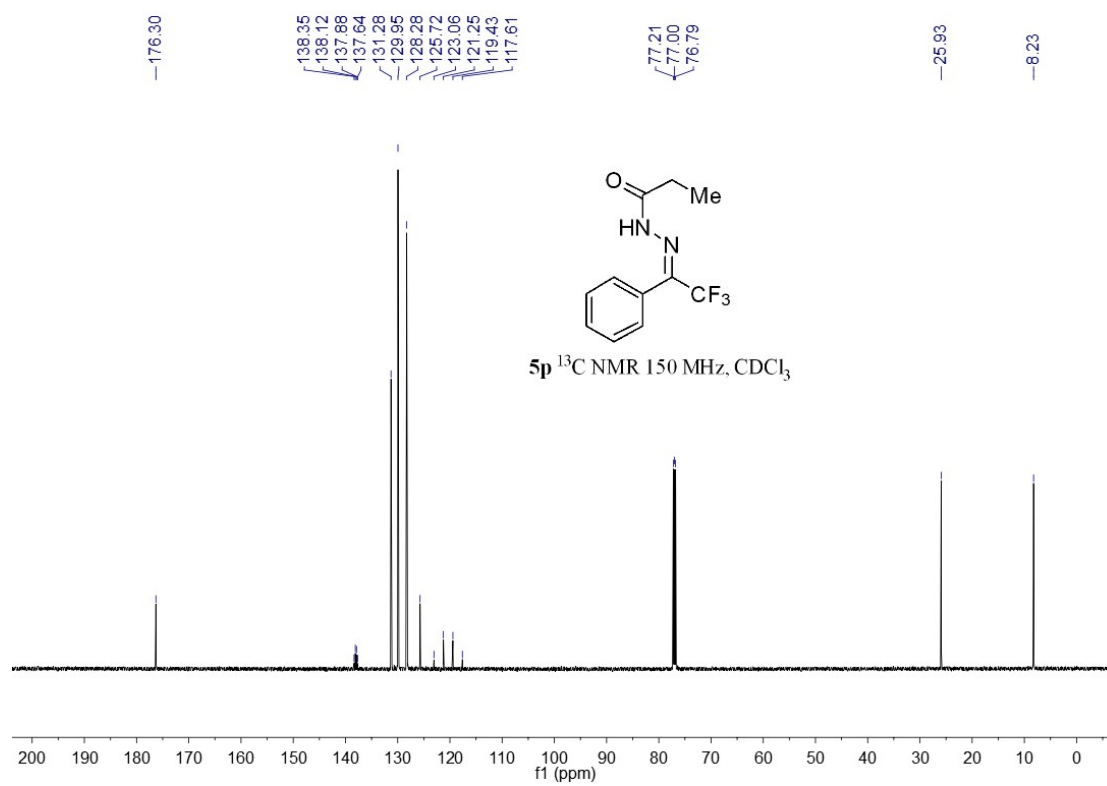

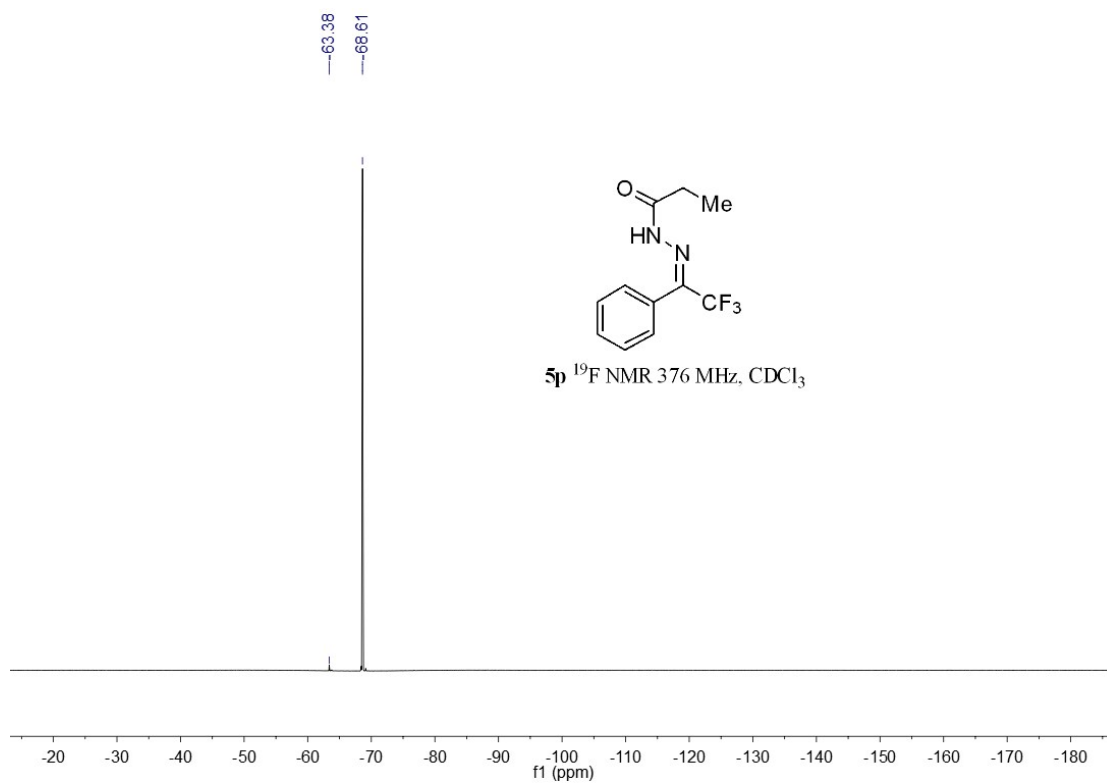

NMR copies of major product of compound **5q**:

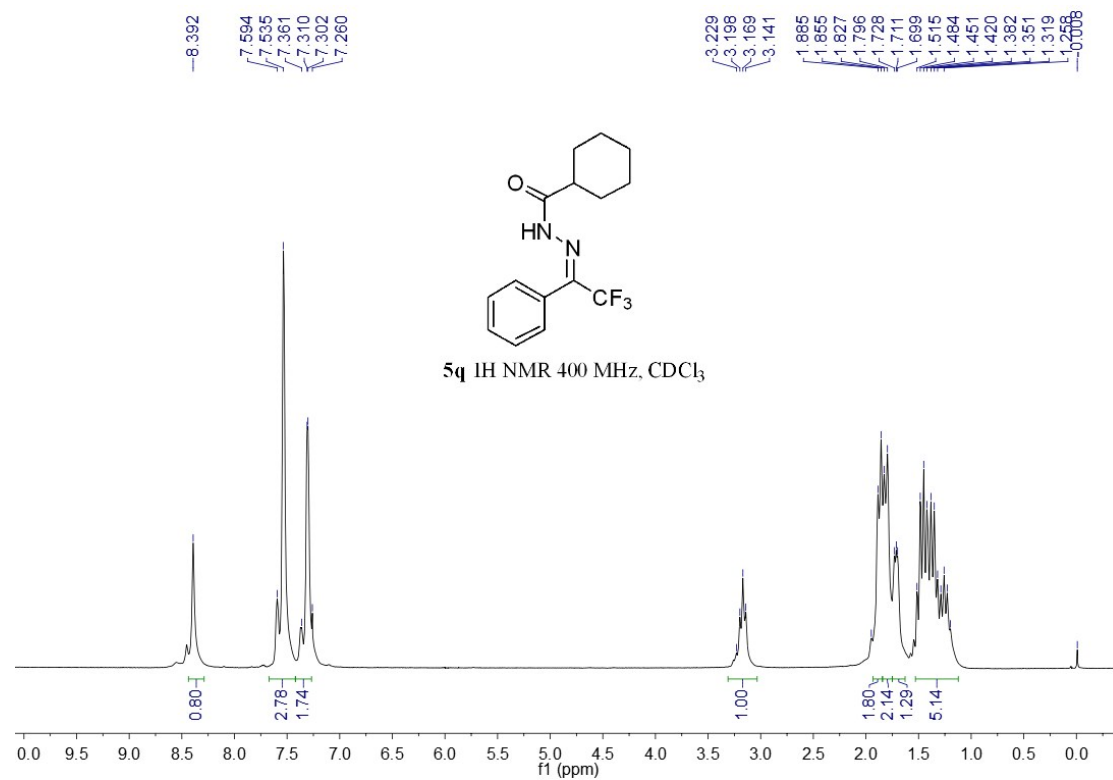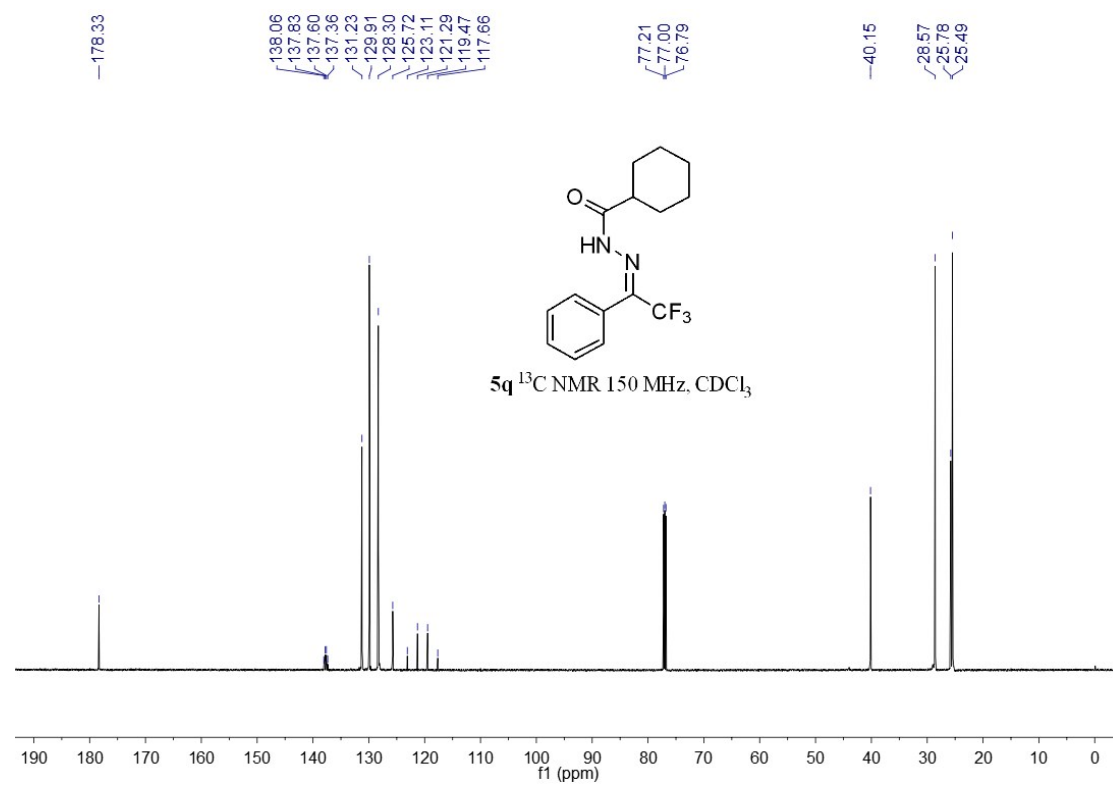

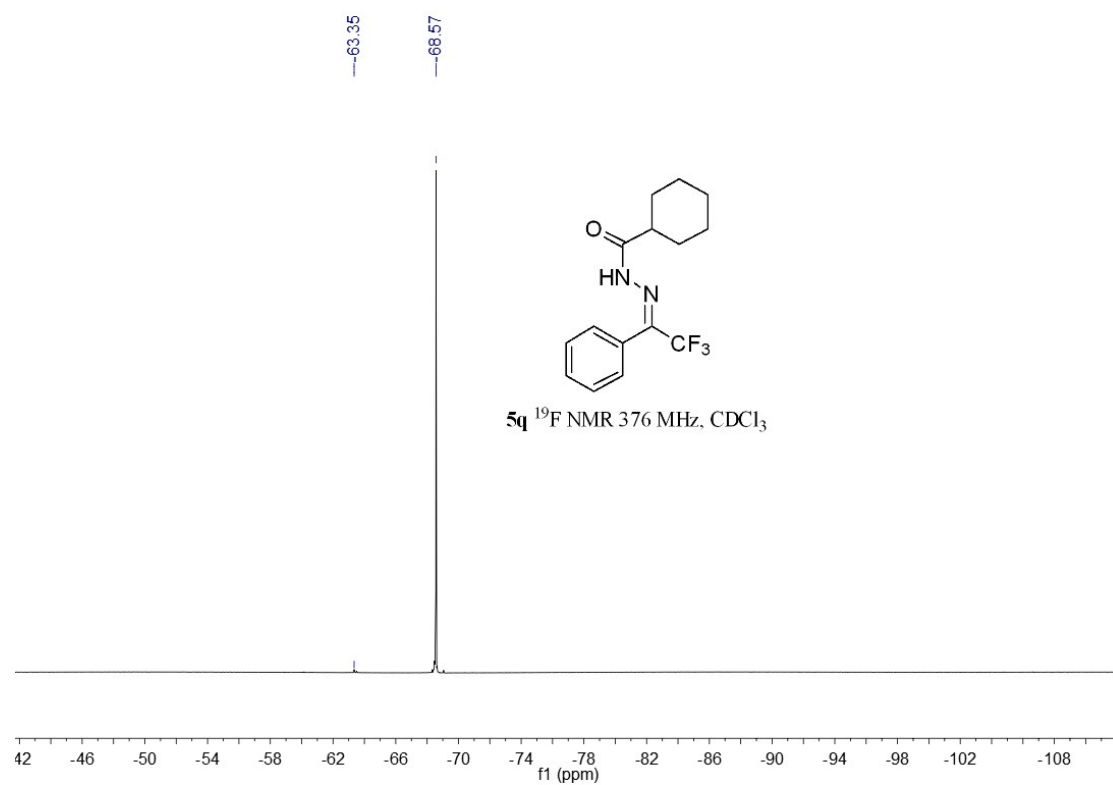



NMR copies of major product of compound **5r**:

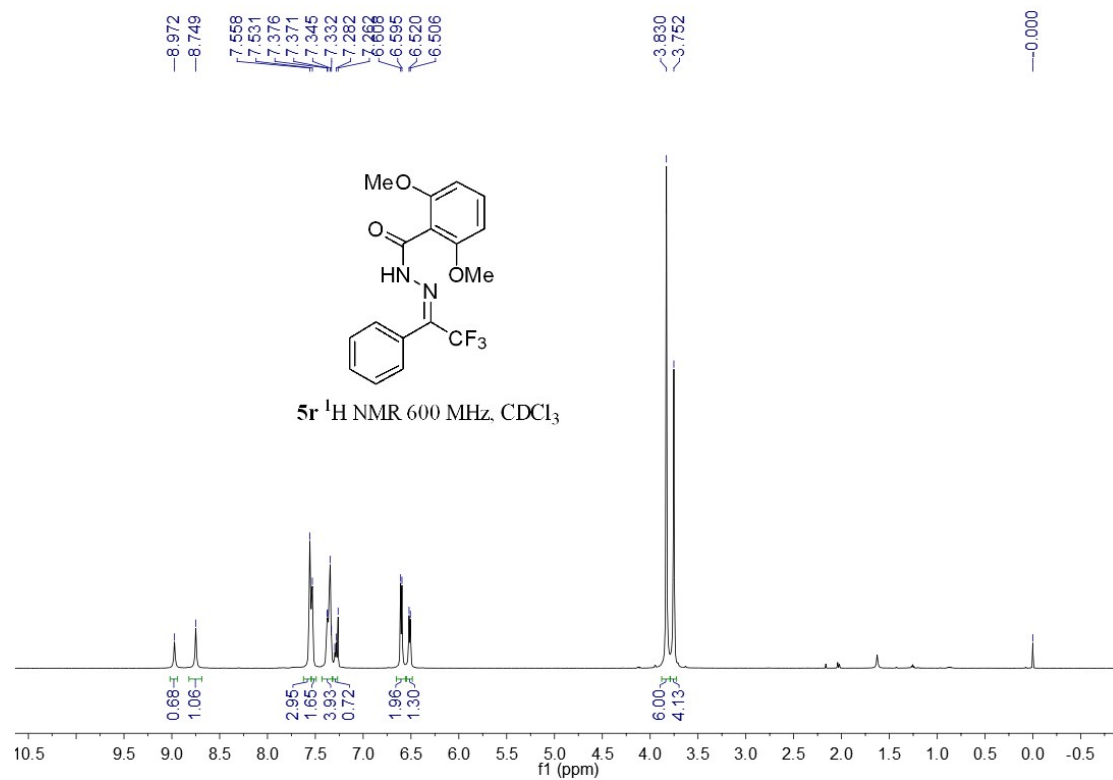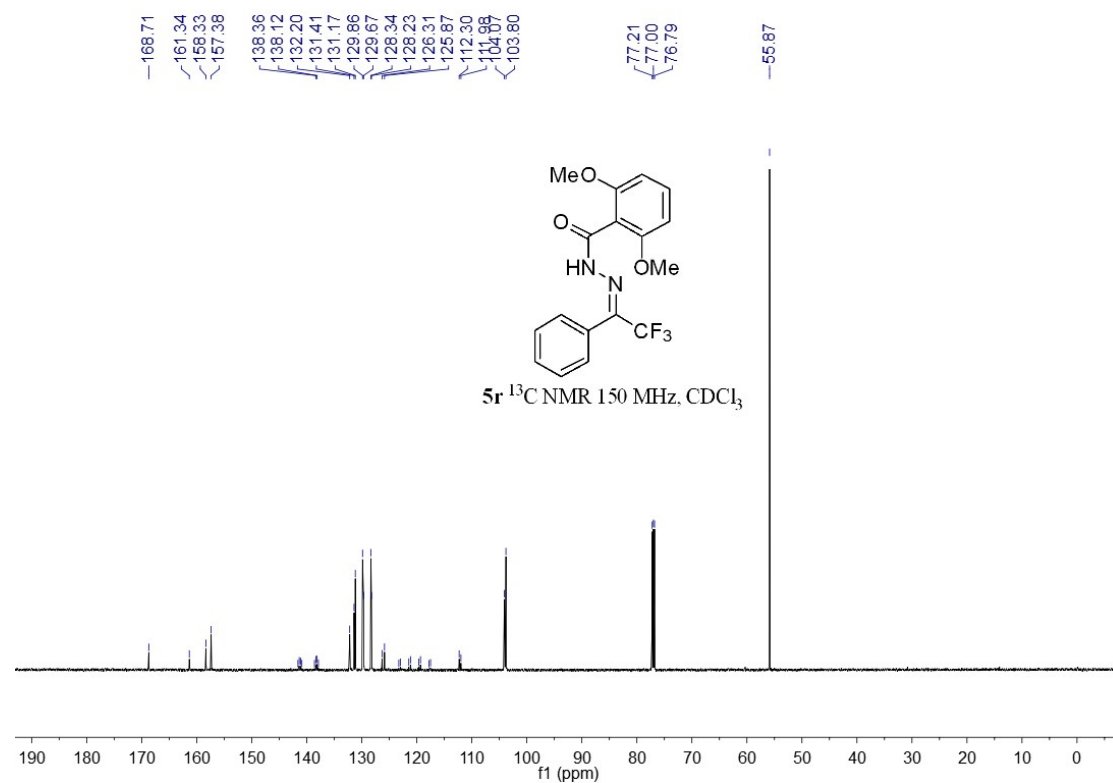

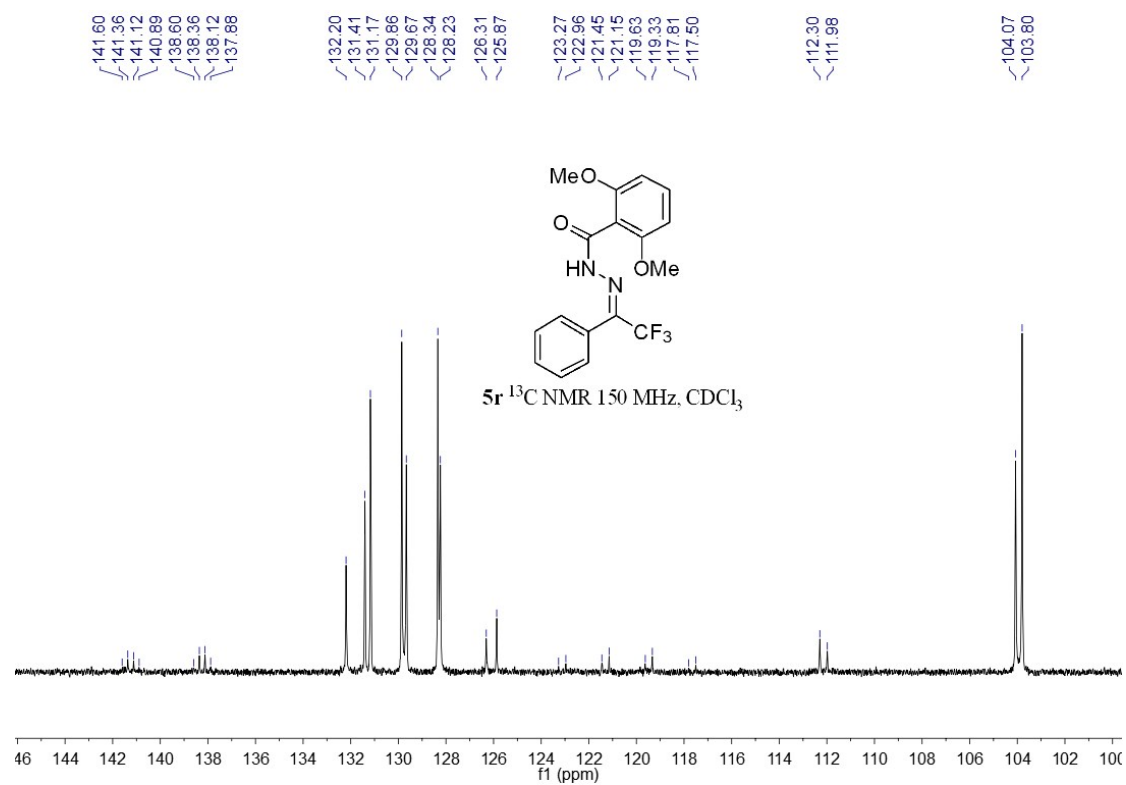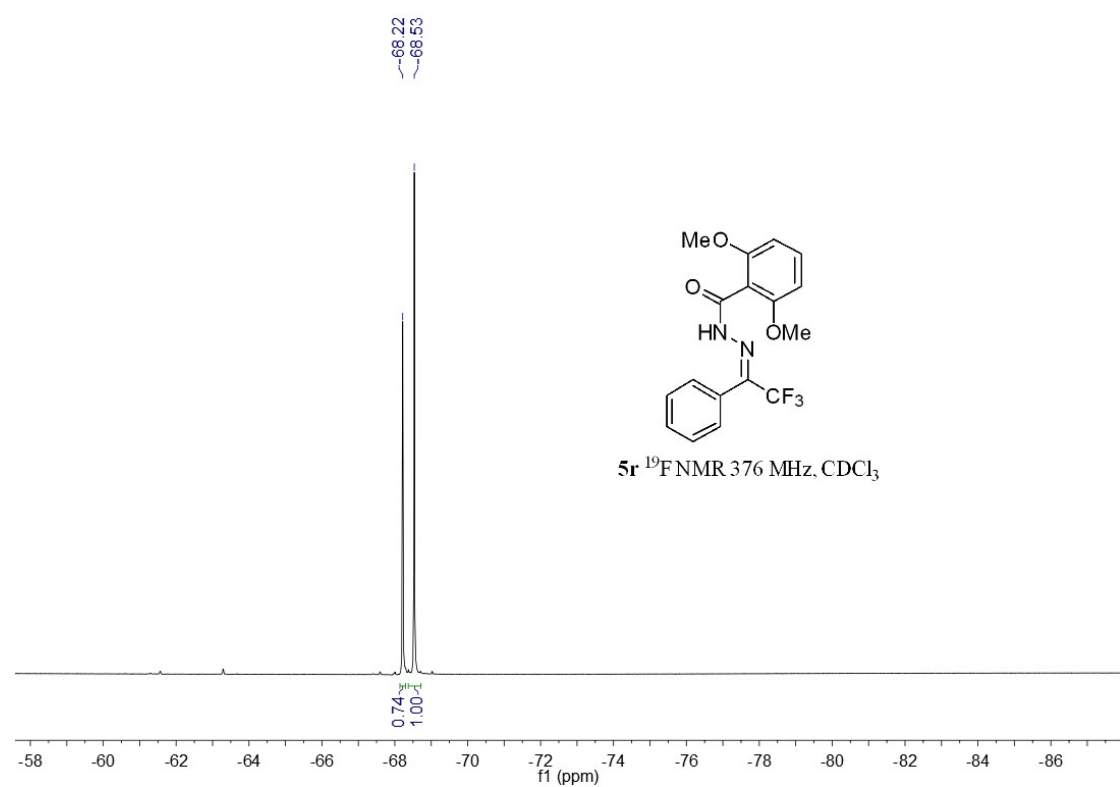

NMR copies of major product of compound **5s**:

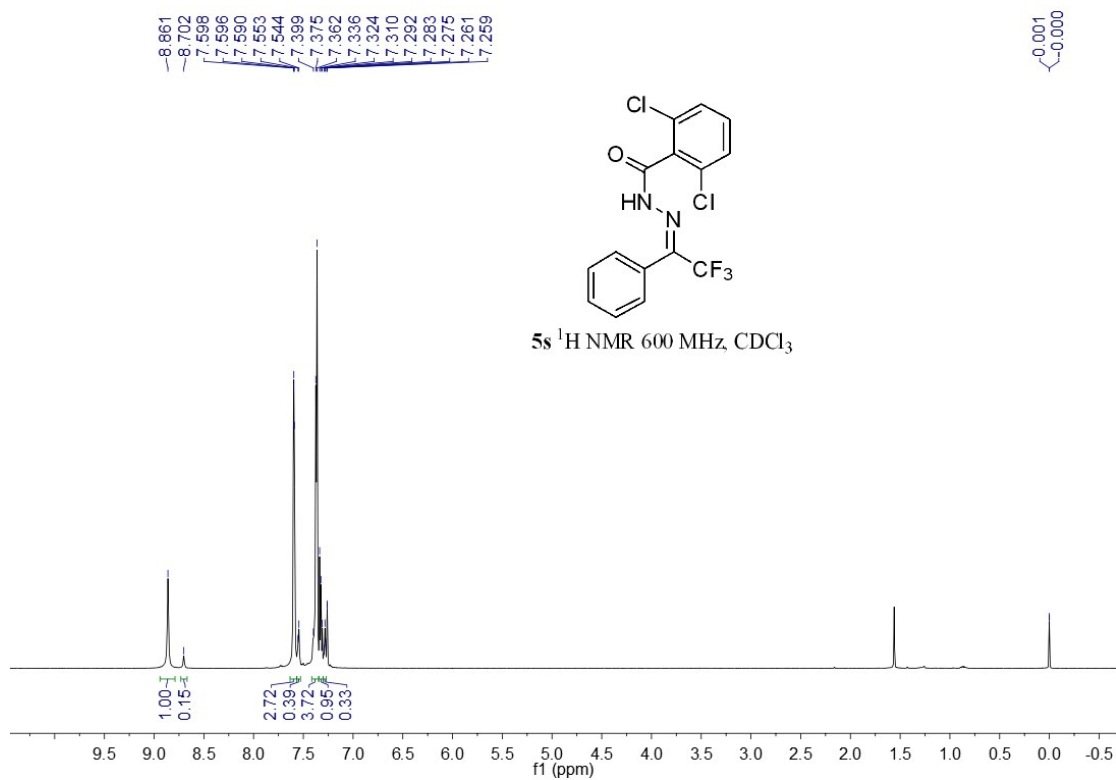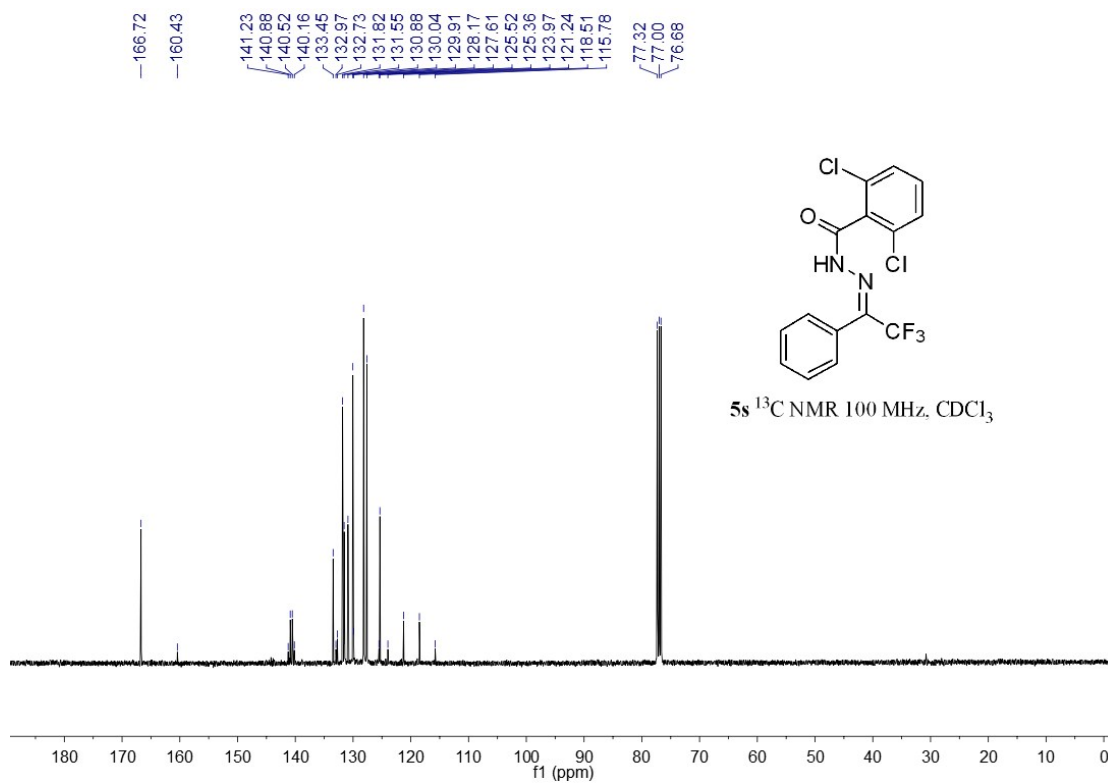

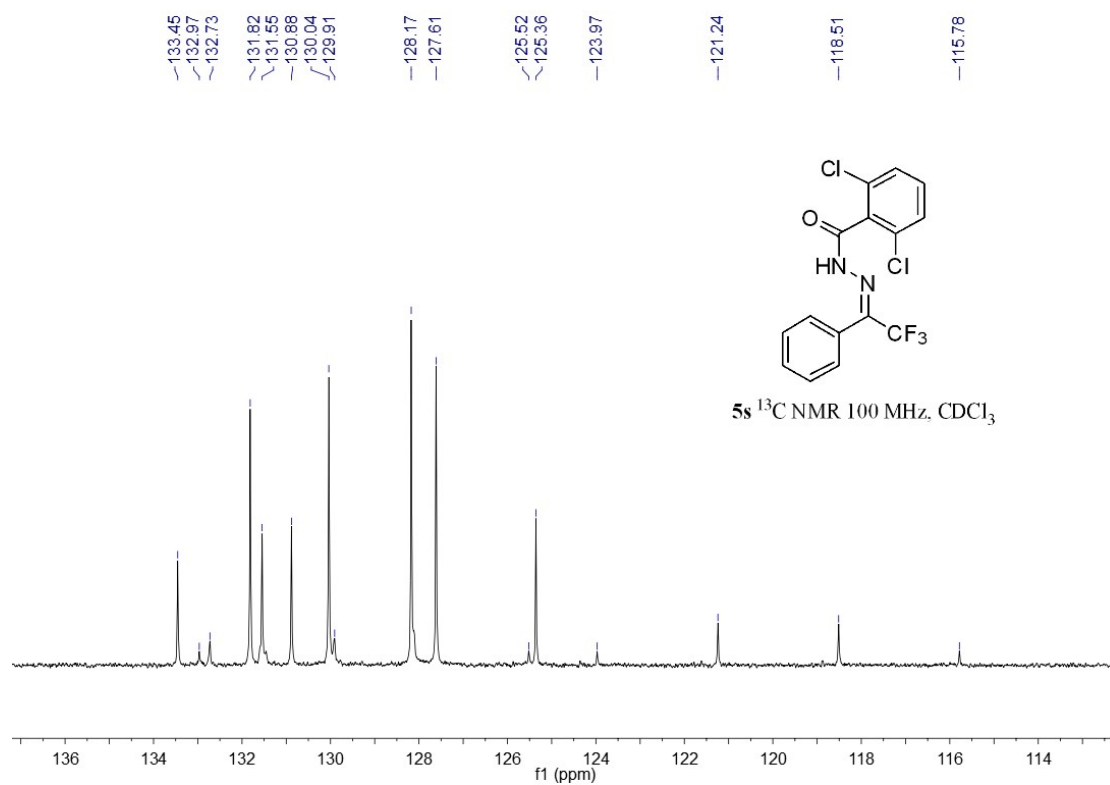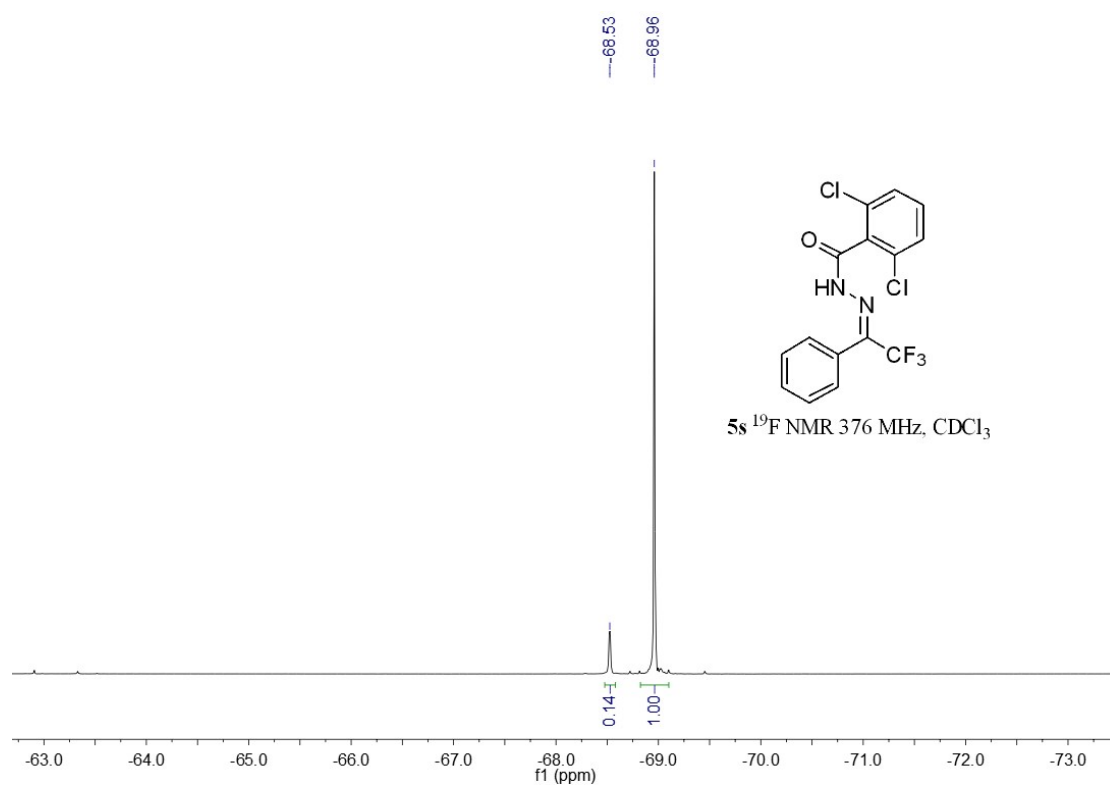

NMR copies of major product of compound **5t**:

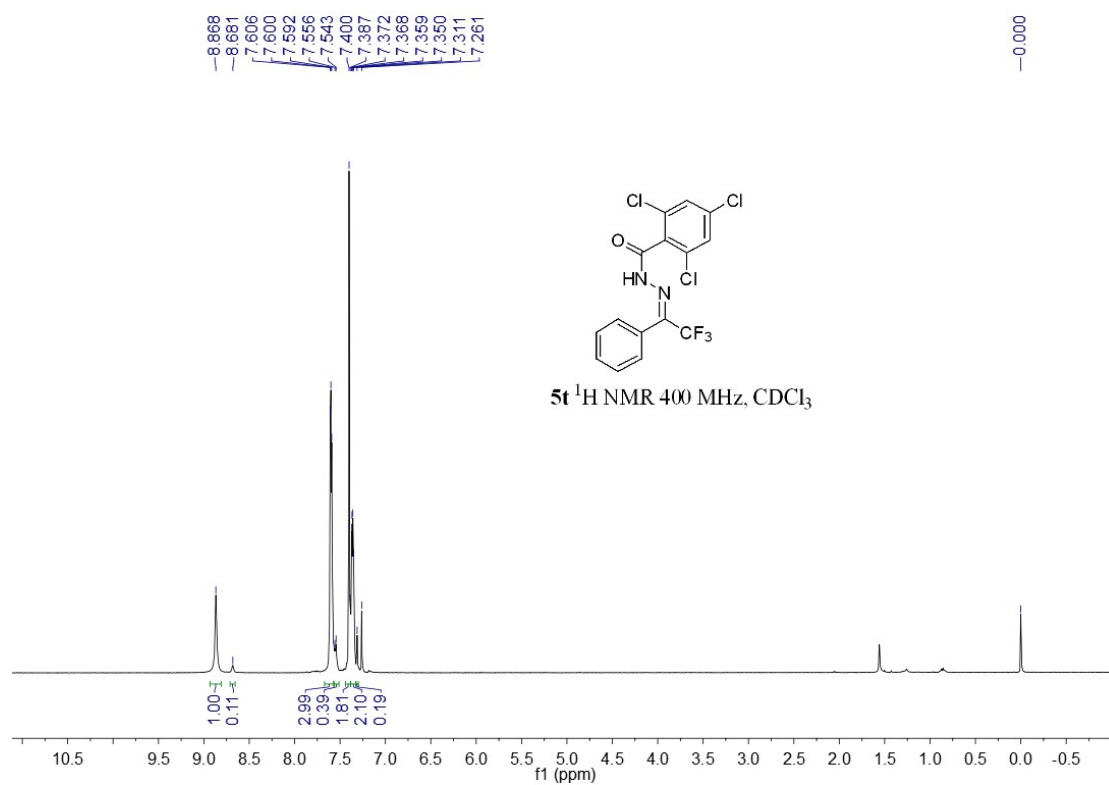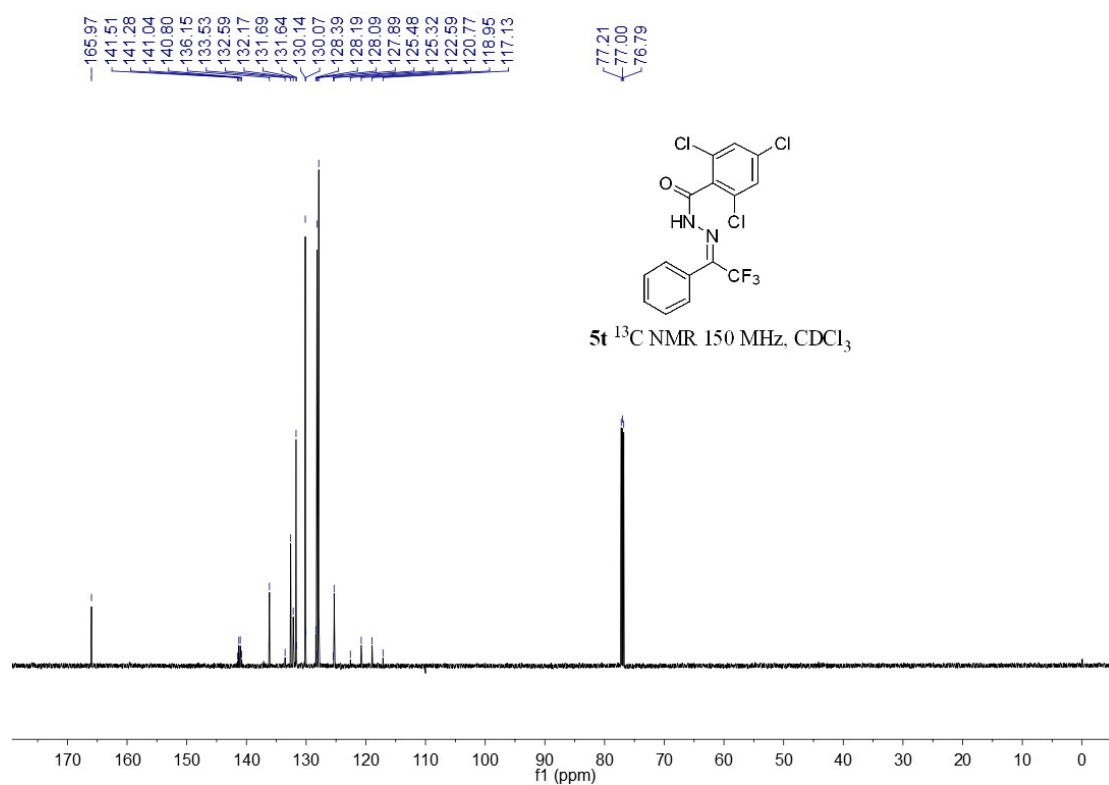

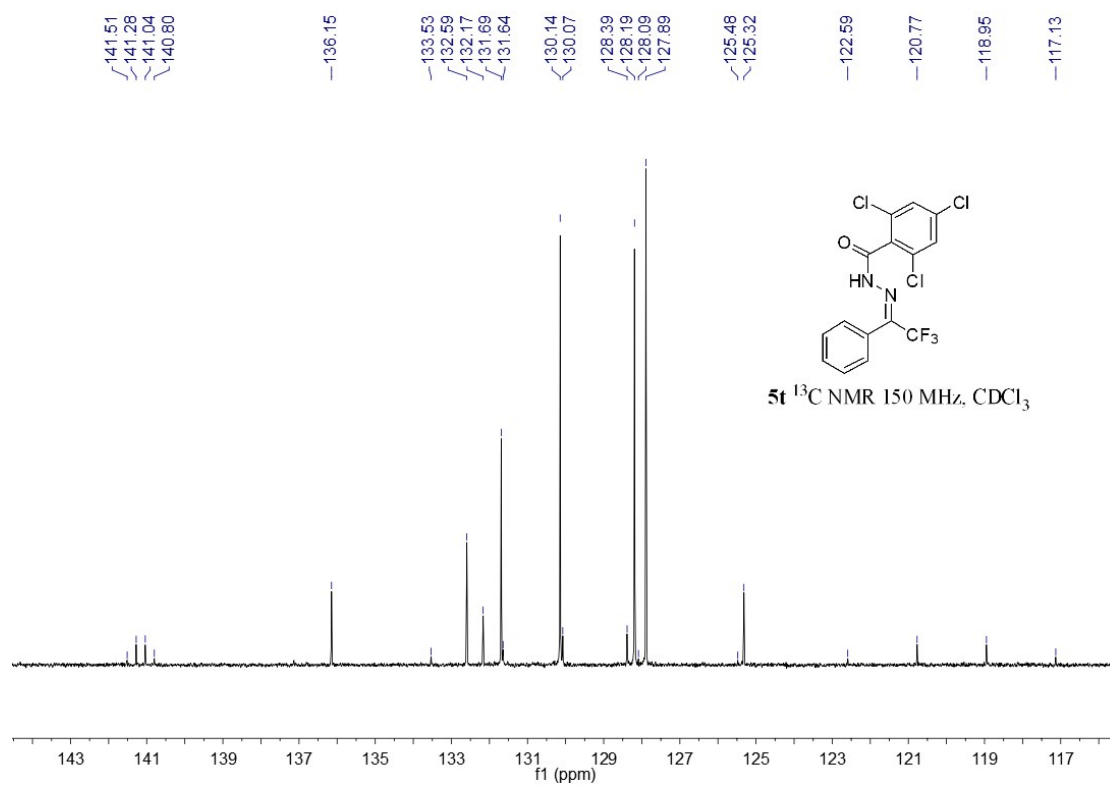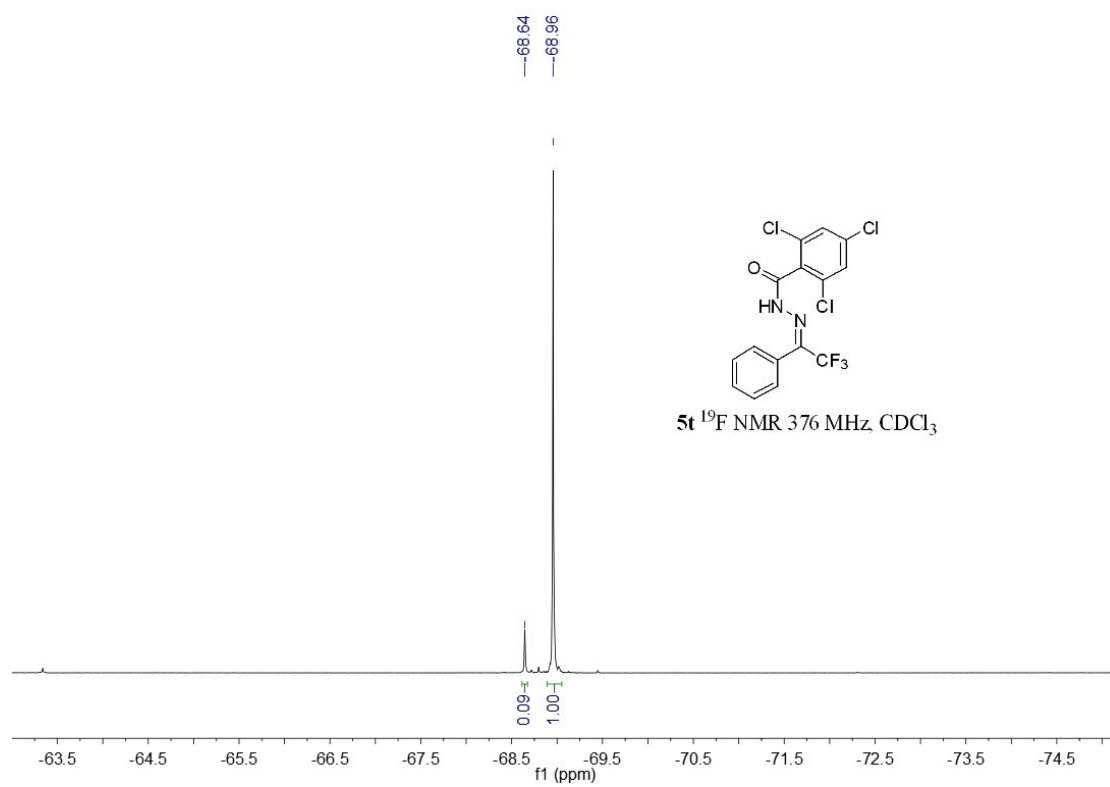

NMR copies of major product of compound **5ia**:

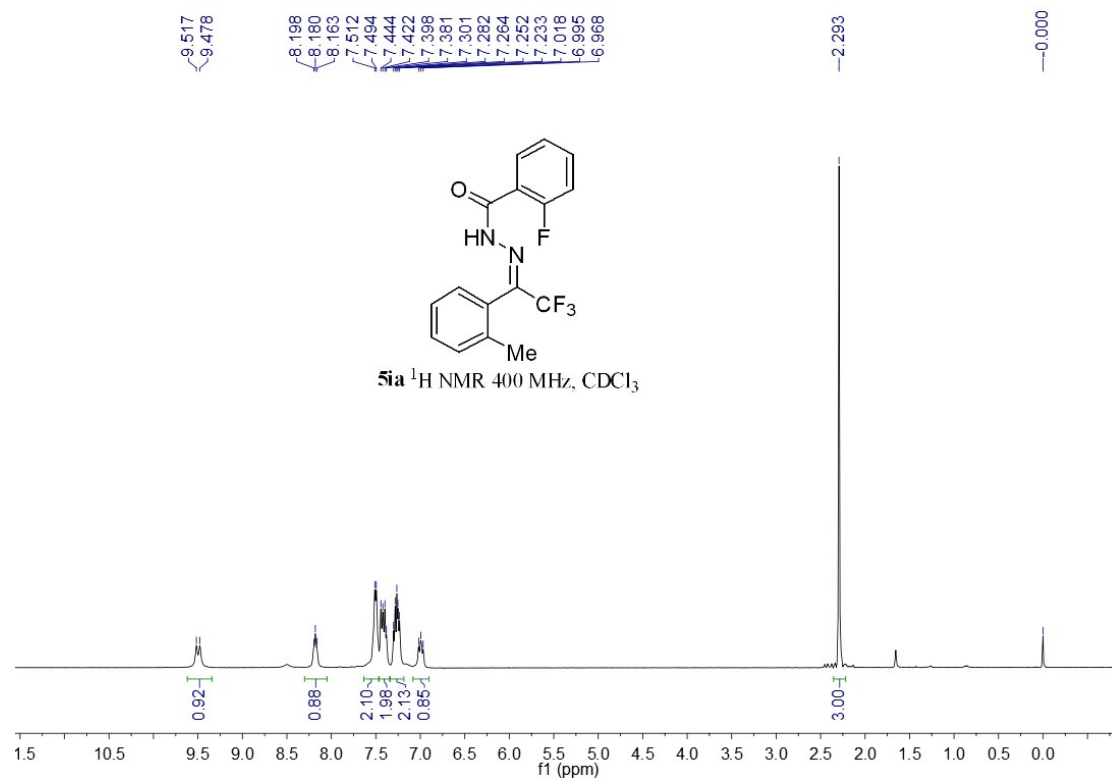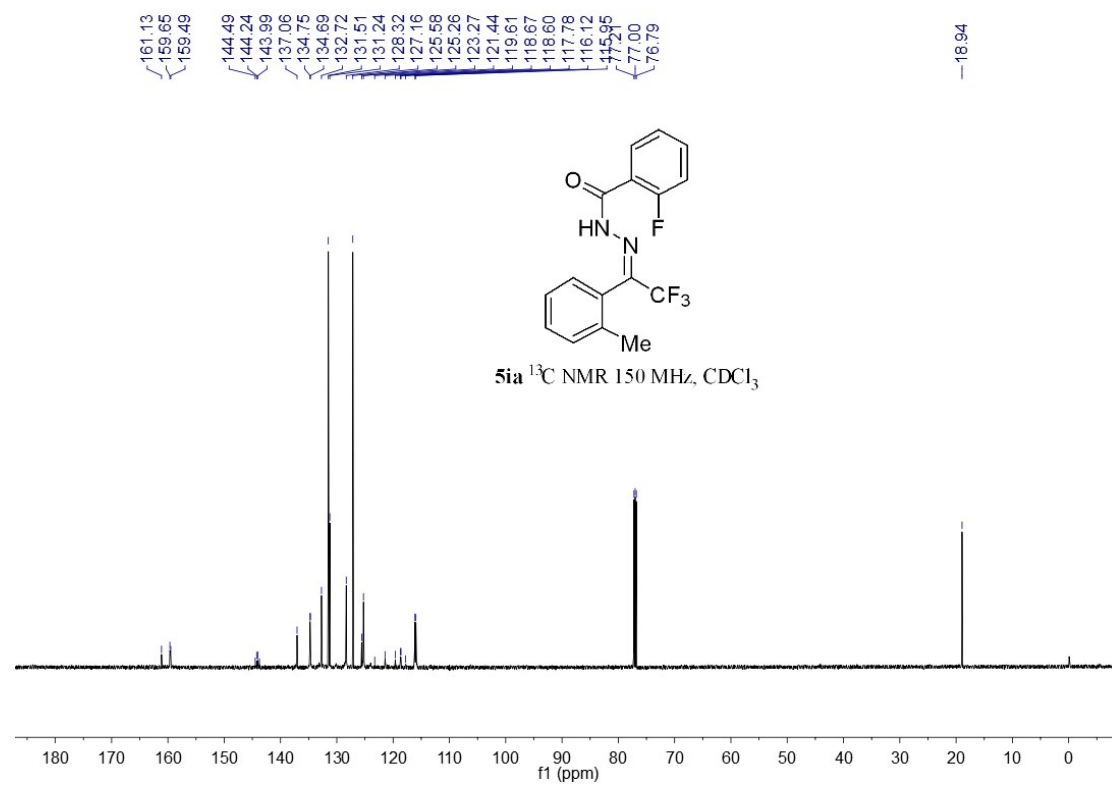

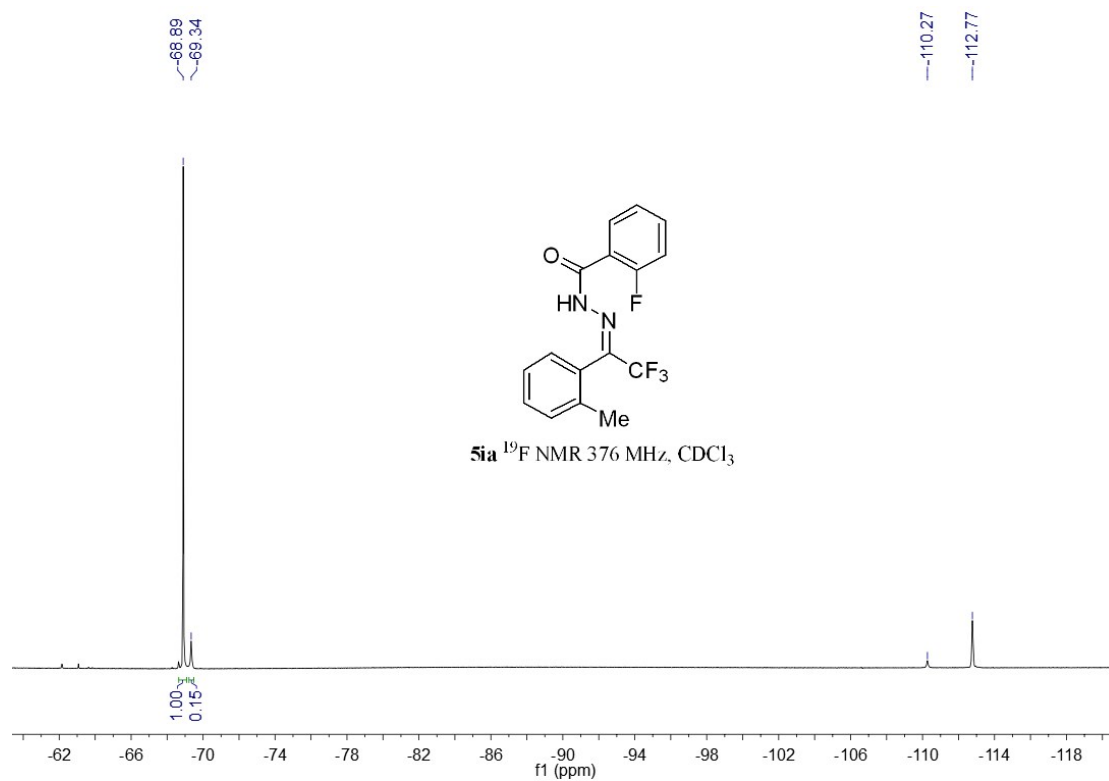



NMR copies of major product of compound **5ib**:

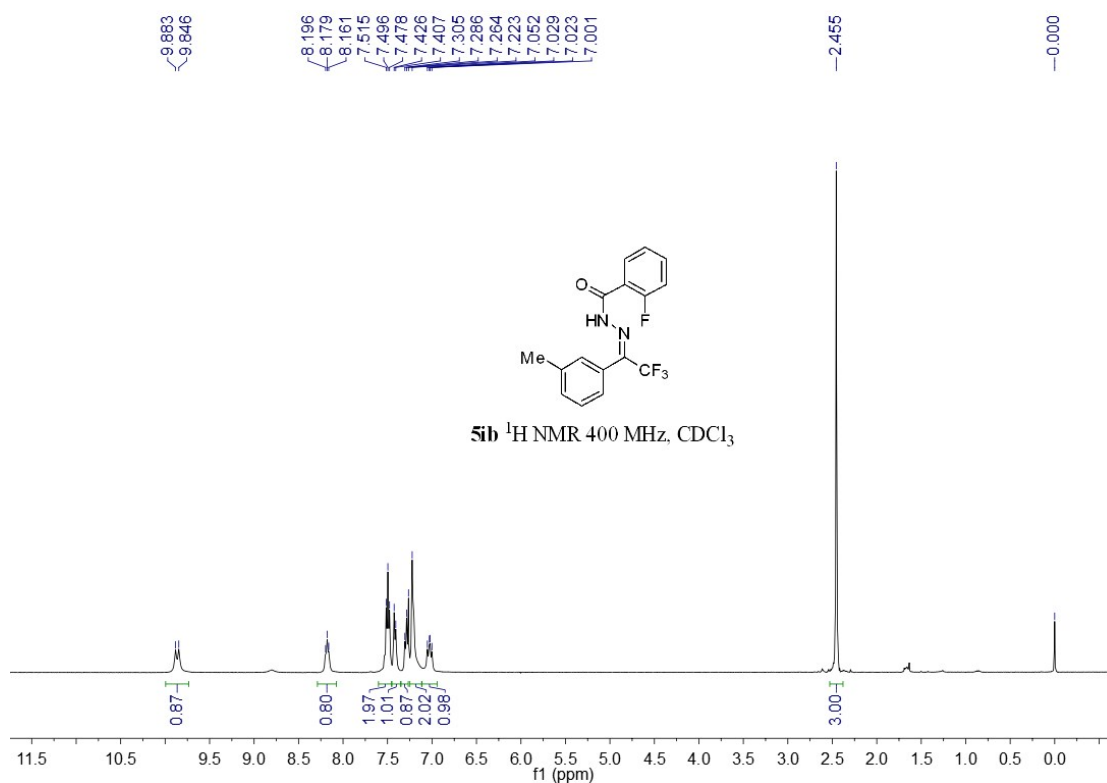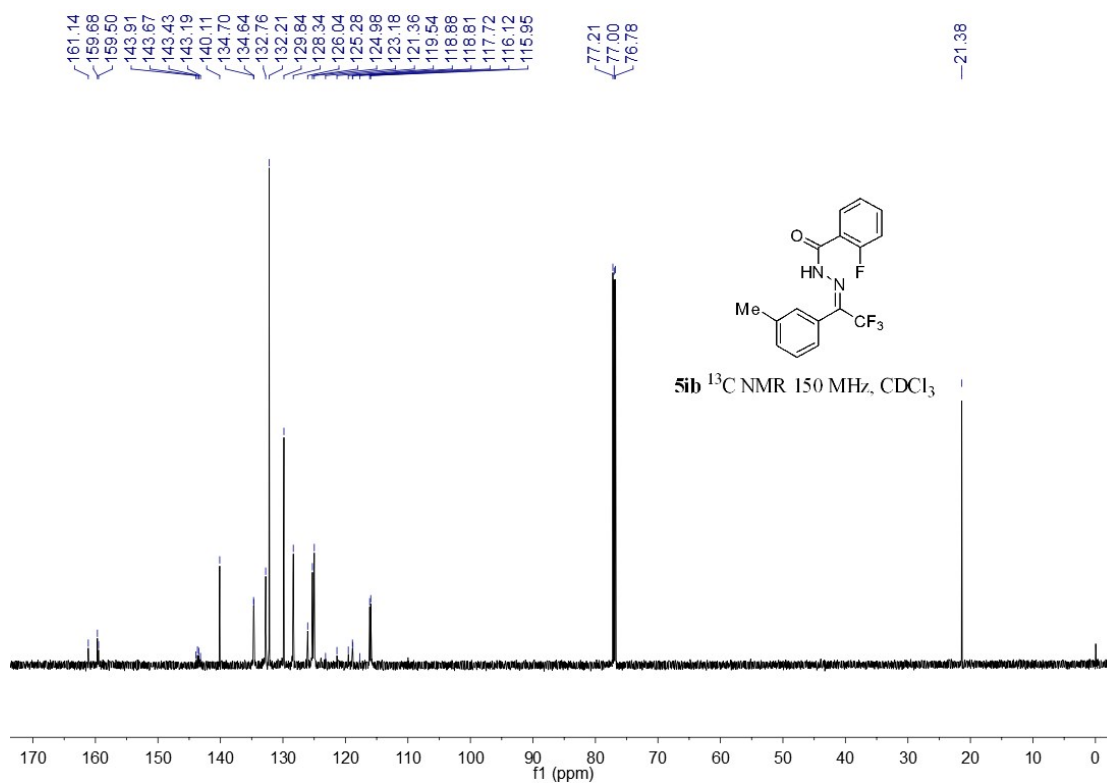

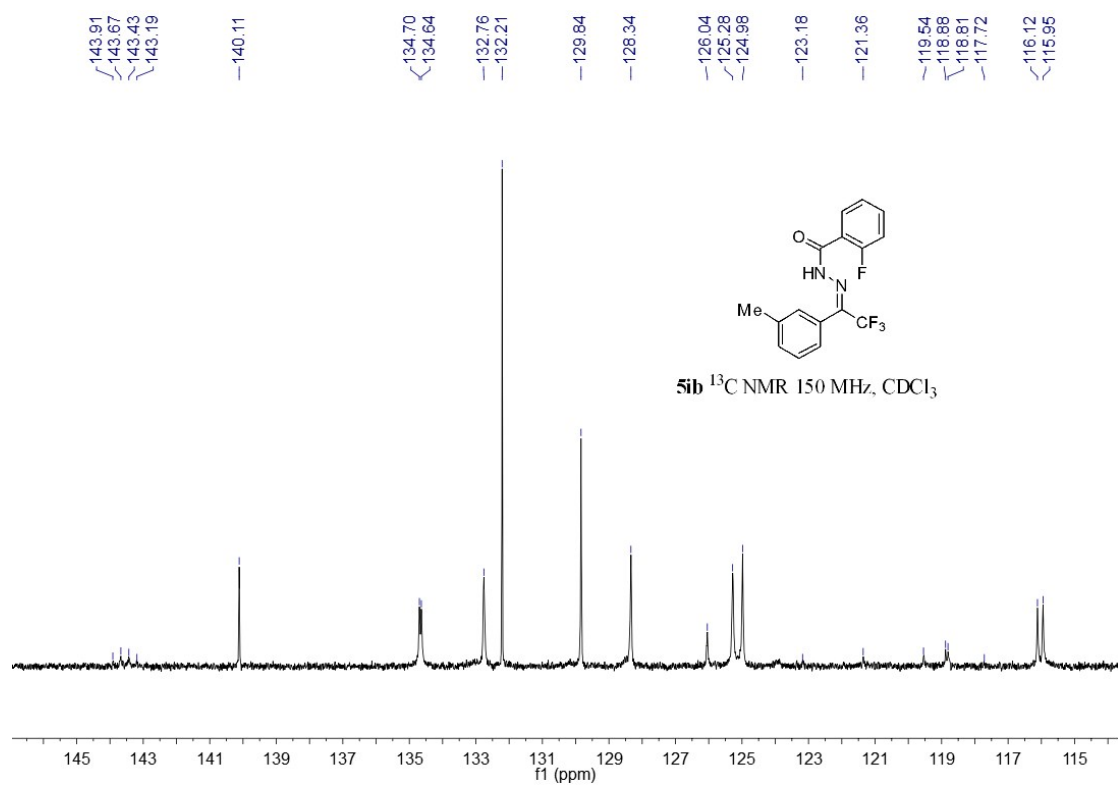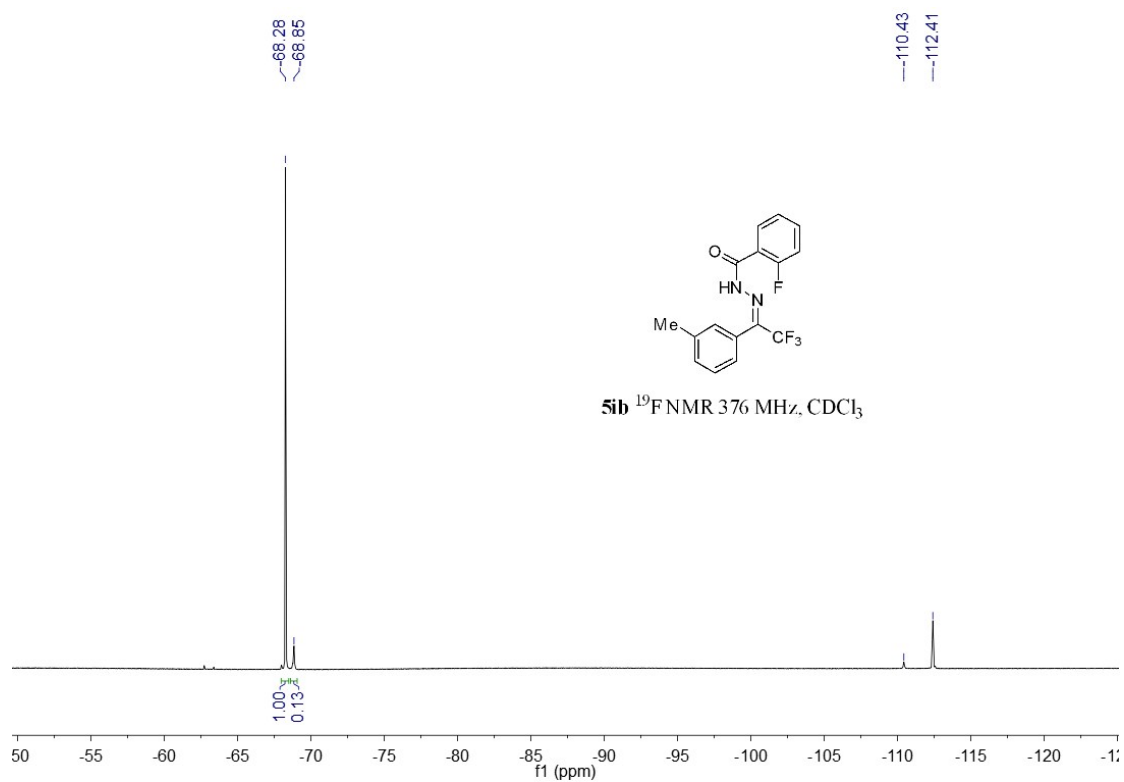

NMR copies of major product of compound **5ic**:

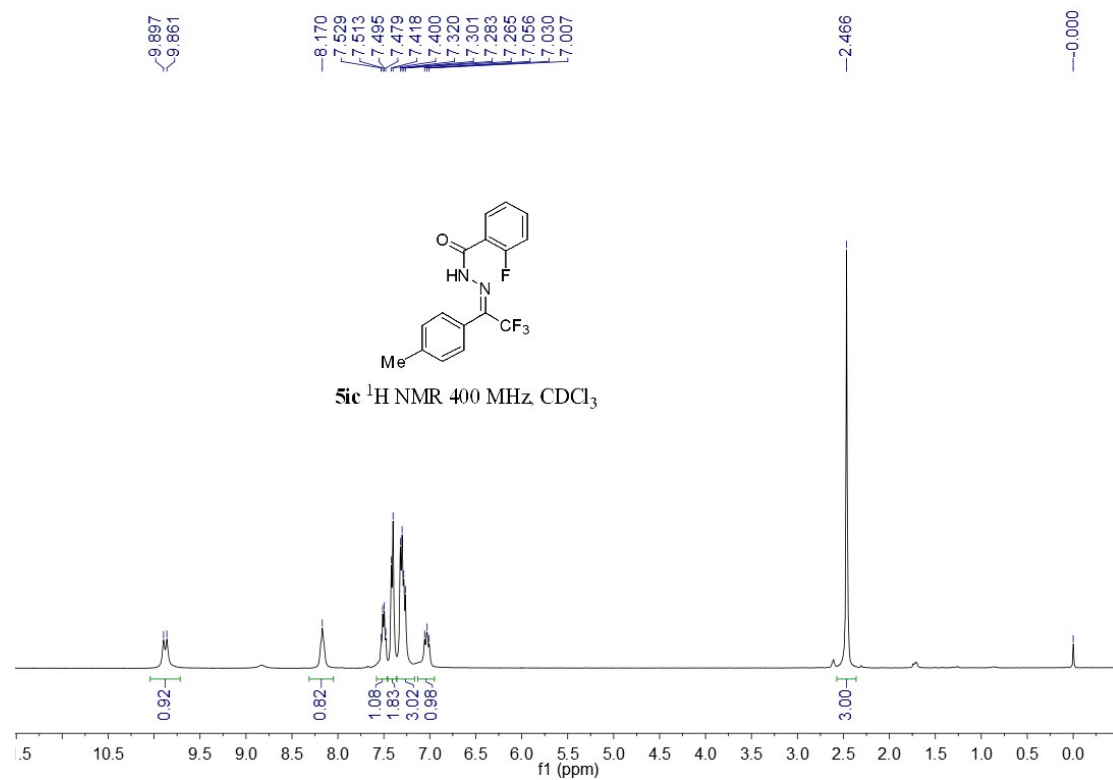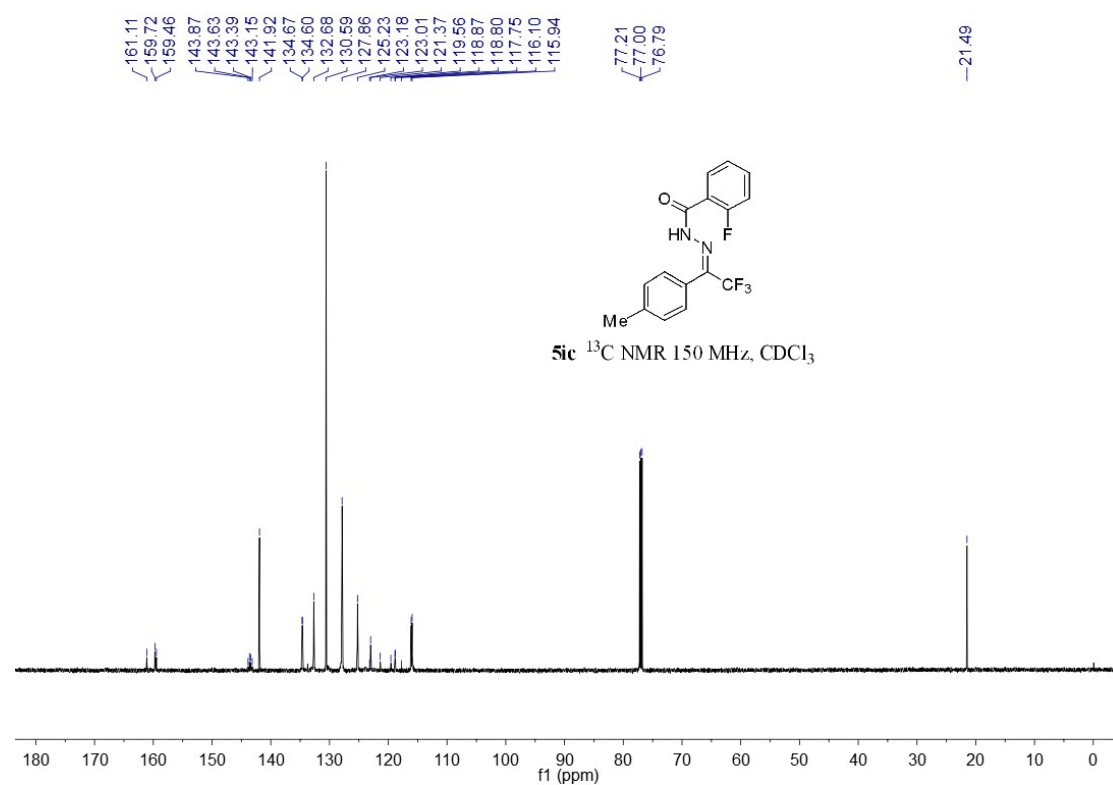

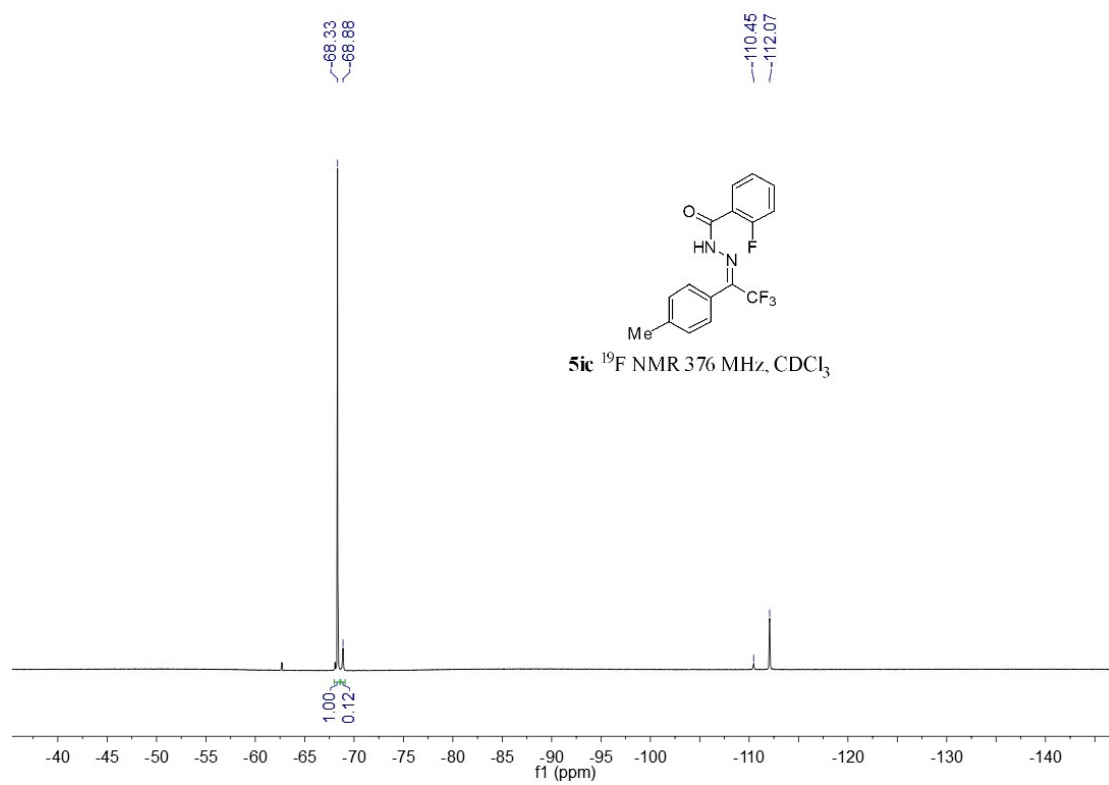

NMR copies of major product of compound **5id**:

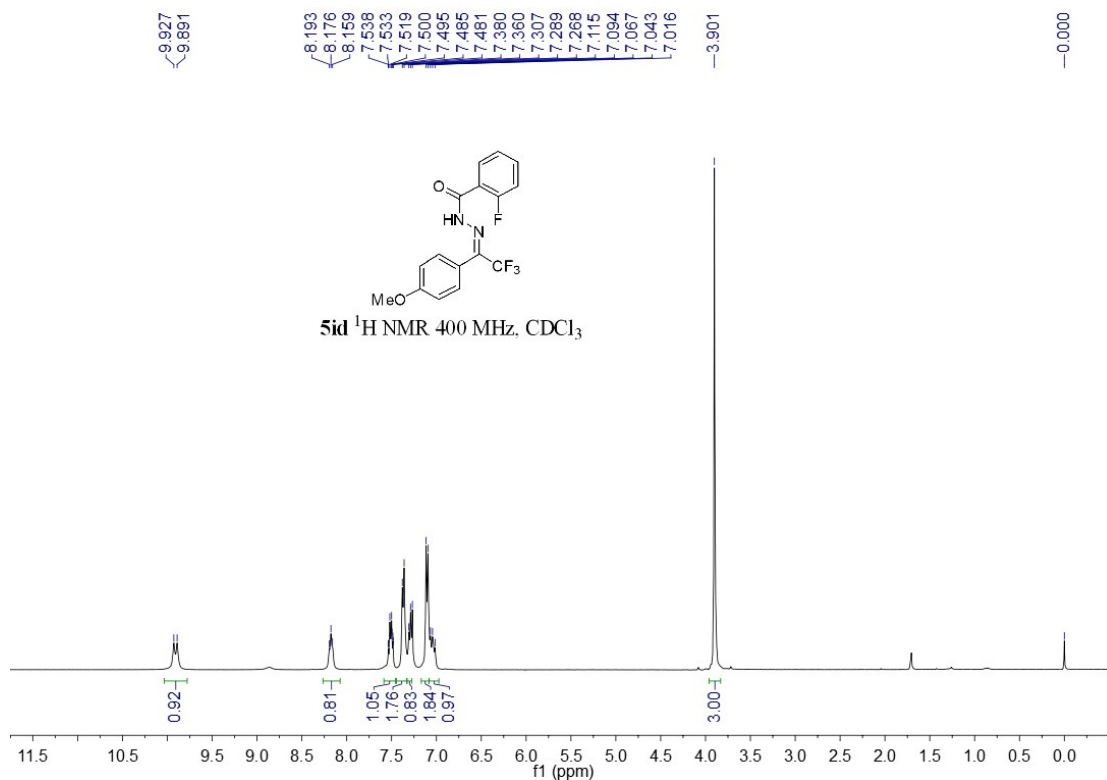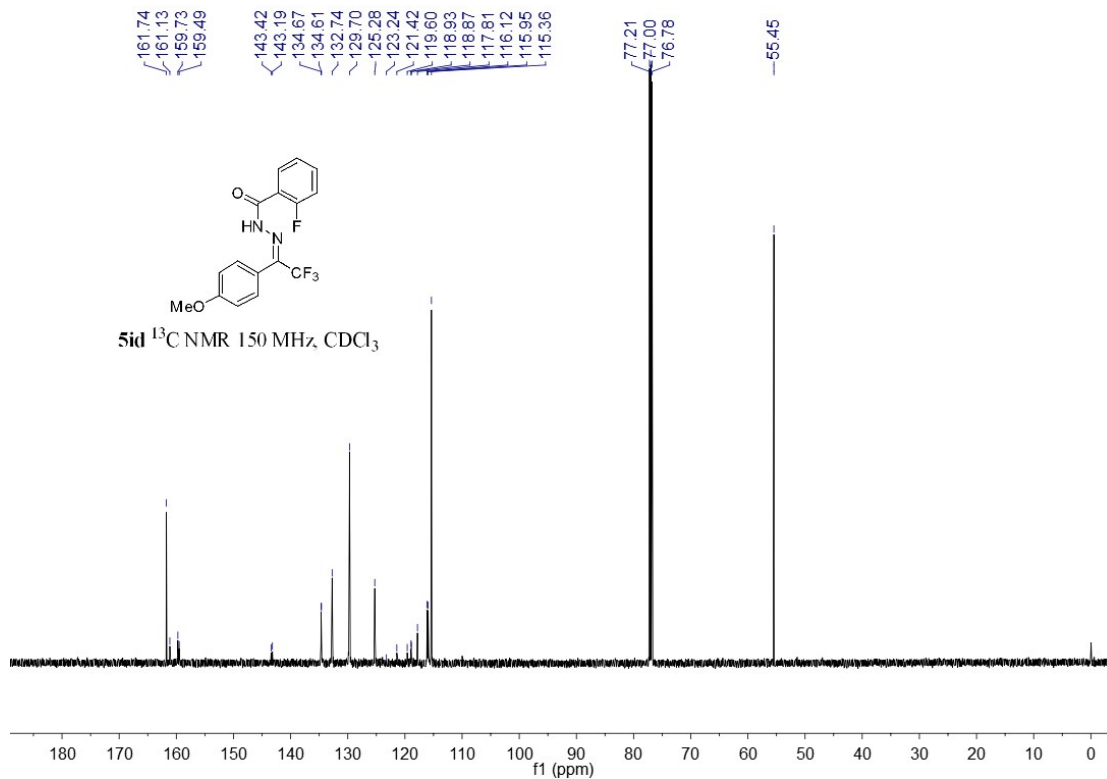

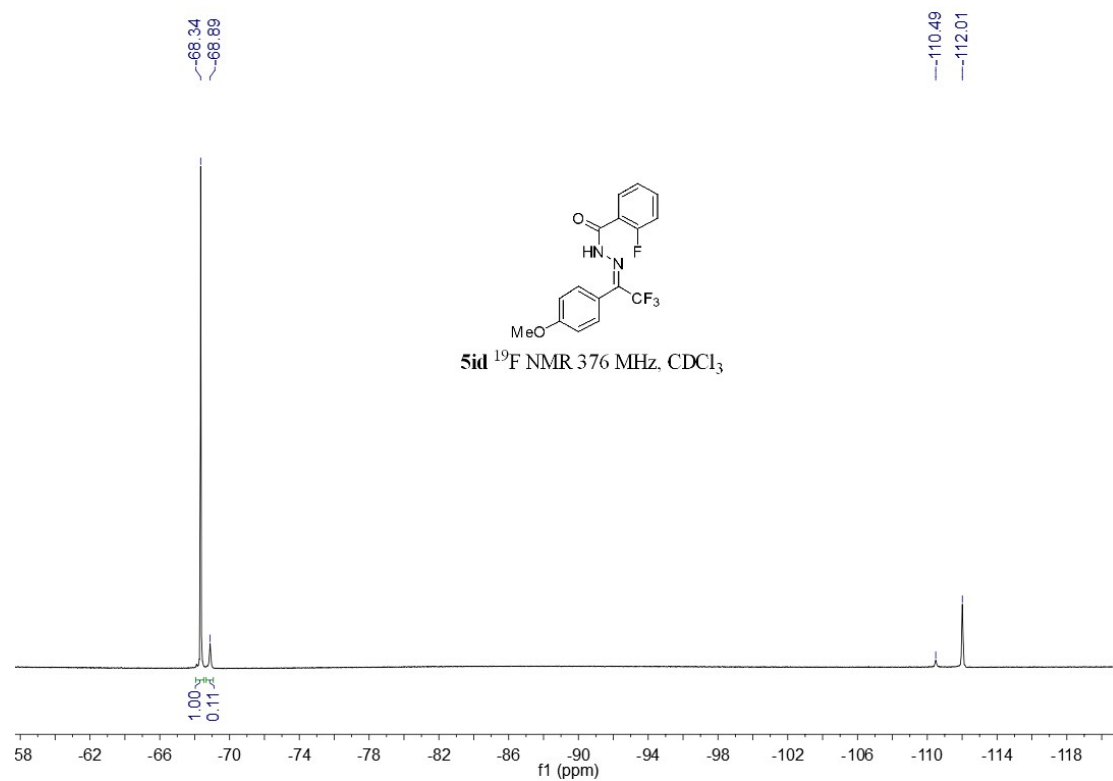

NMR copies of major product of compound **5ja**:

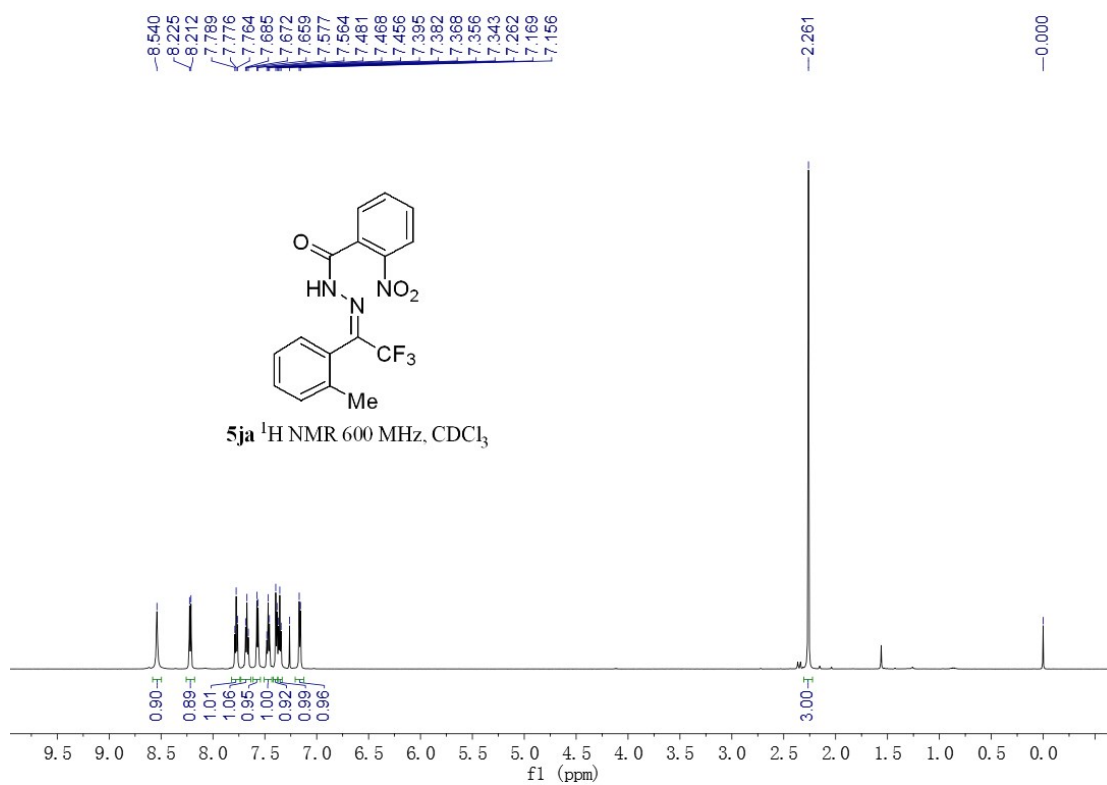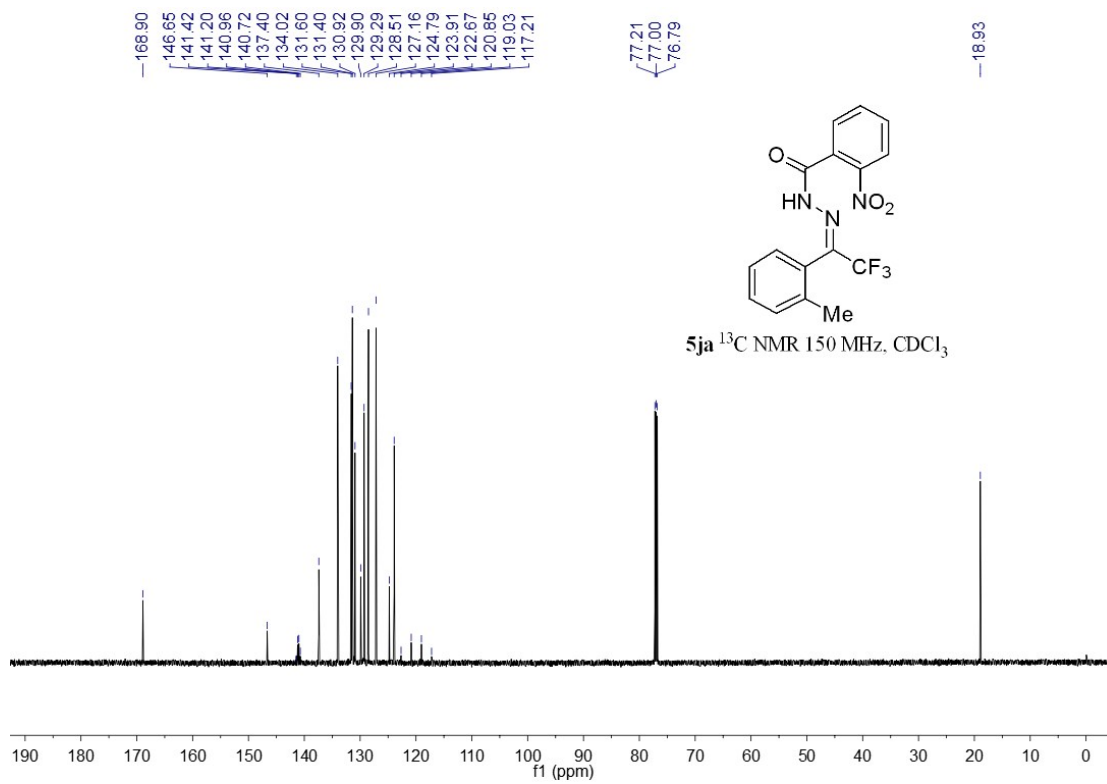

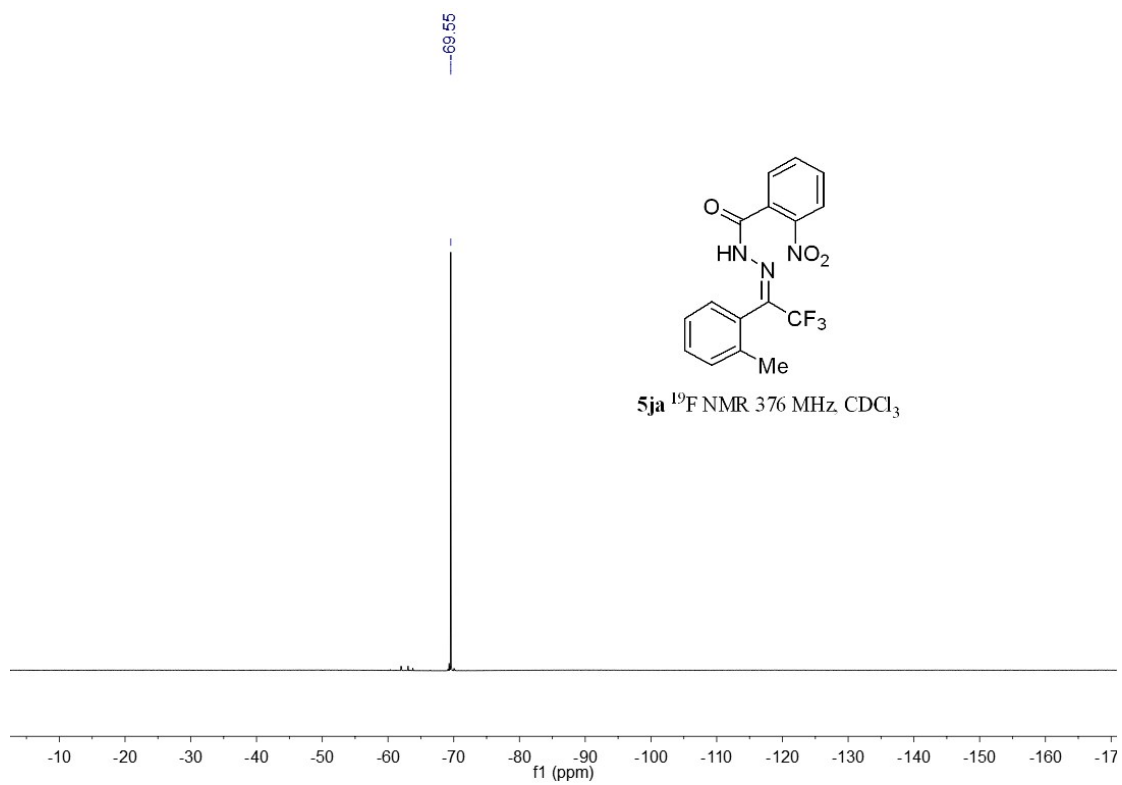



NMR copies of major product of compound **5jb**:

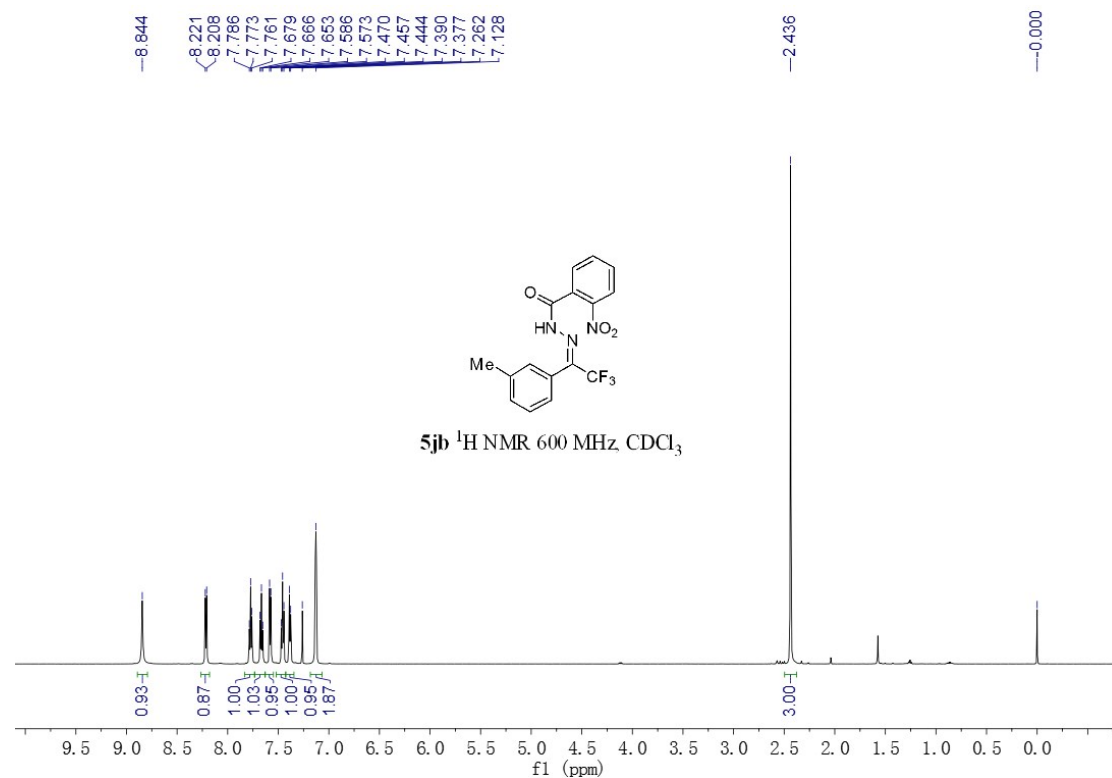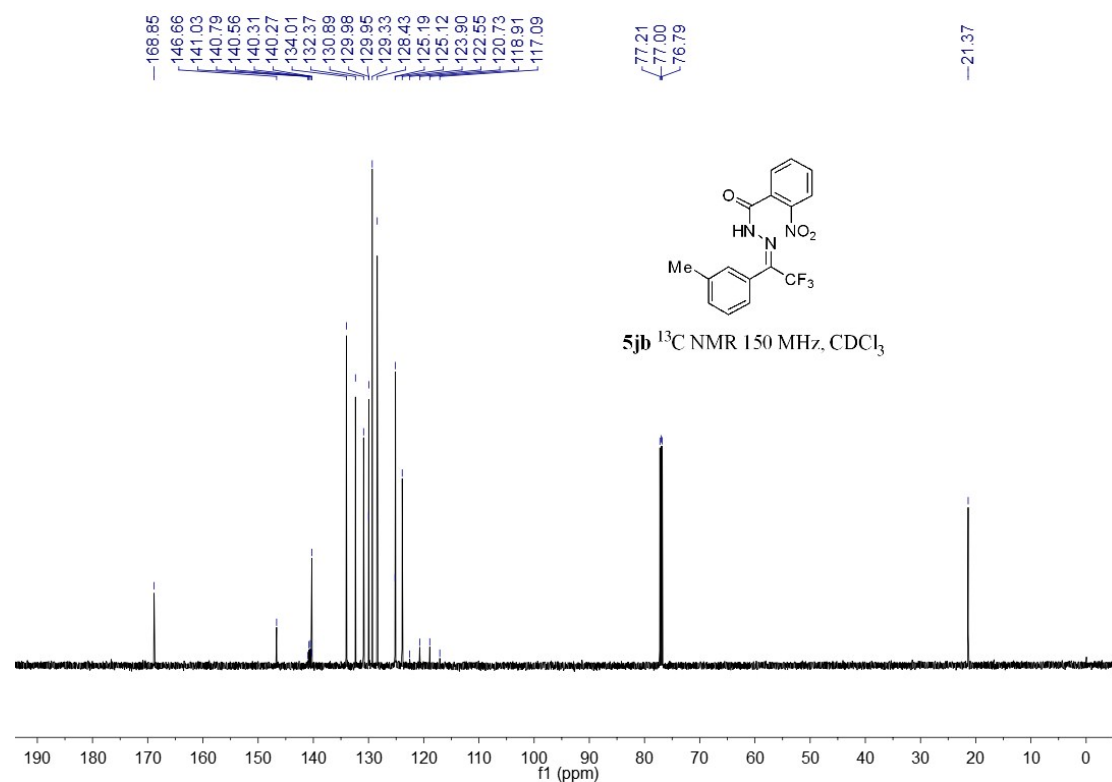

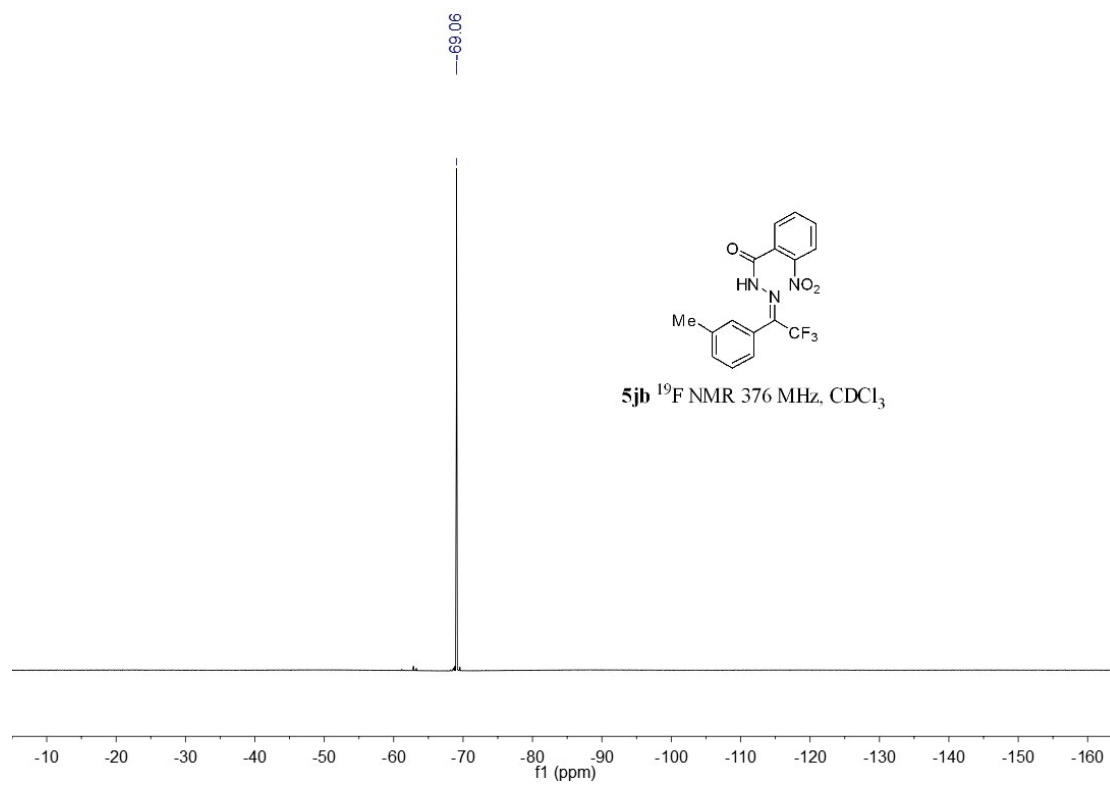

NMR copies of major product of compound **5jc**:

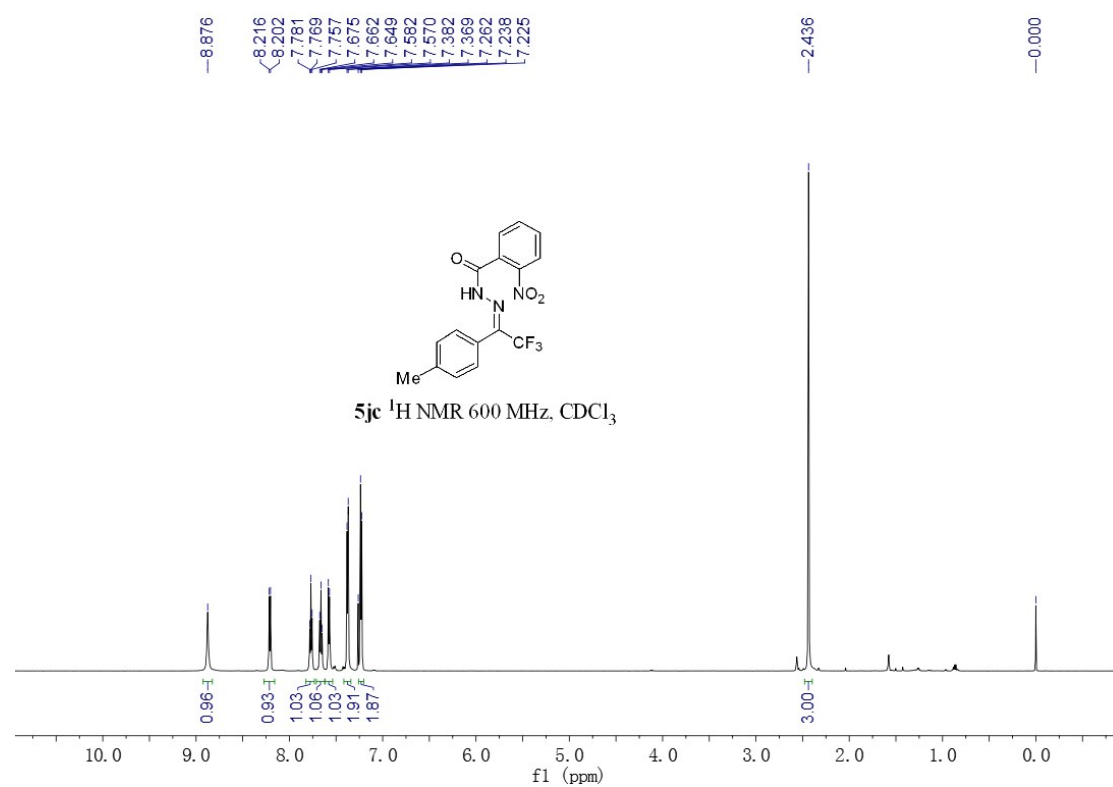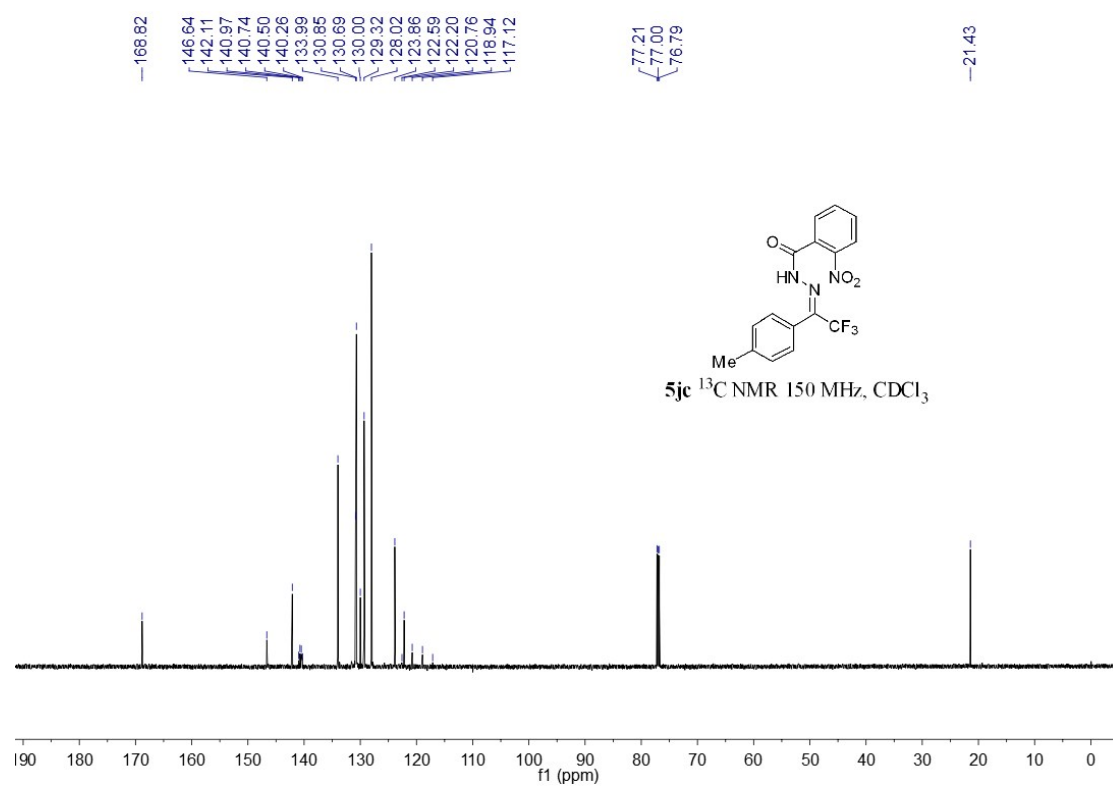

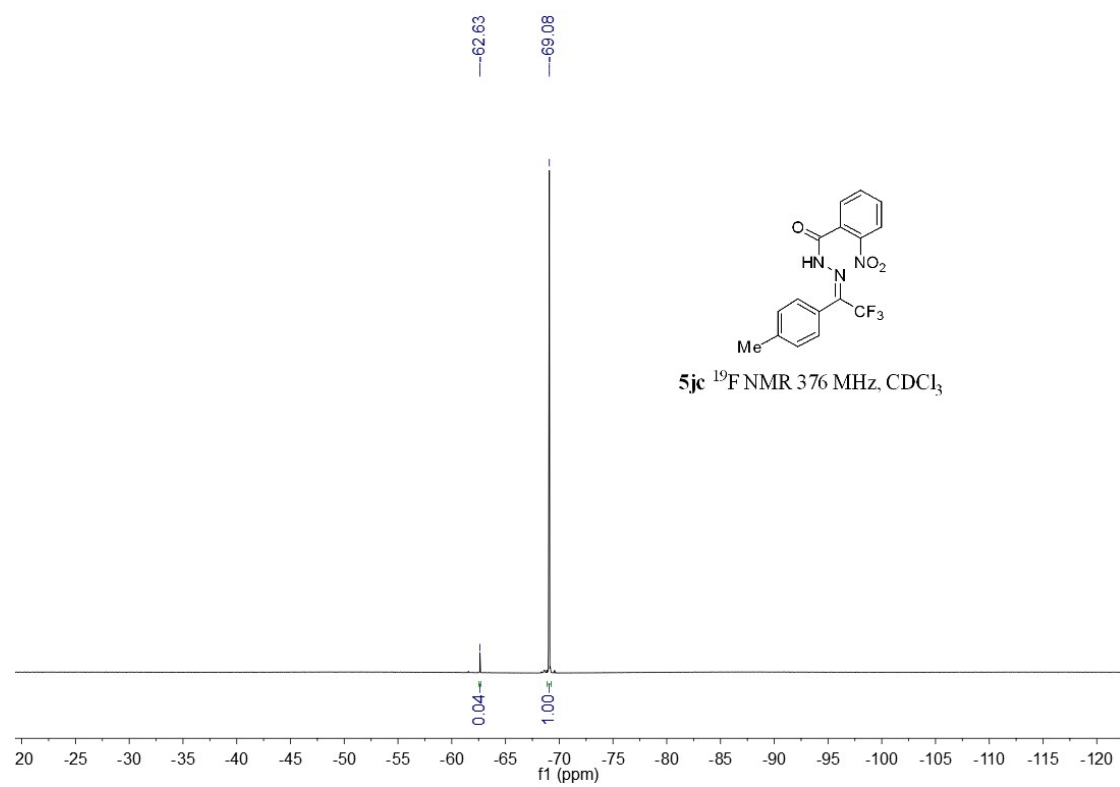

NMR copies of major product of compound **5jd**:

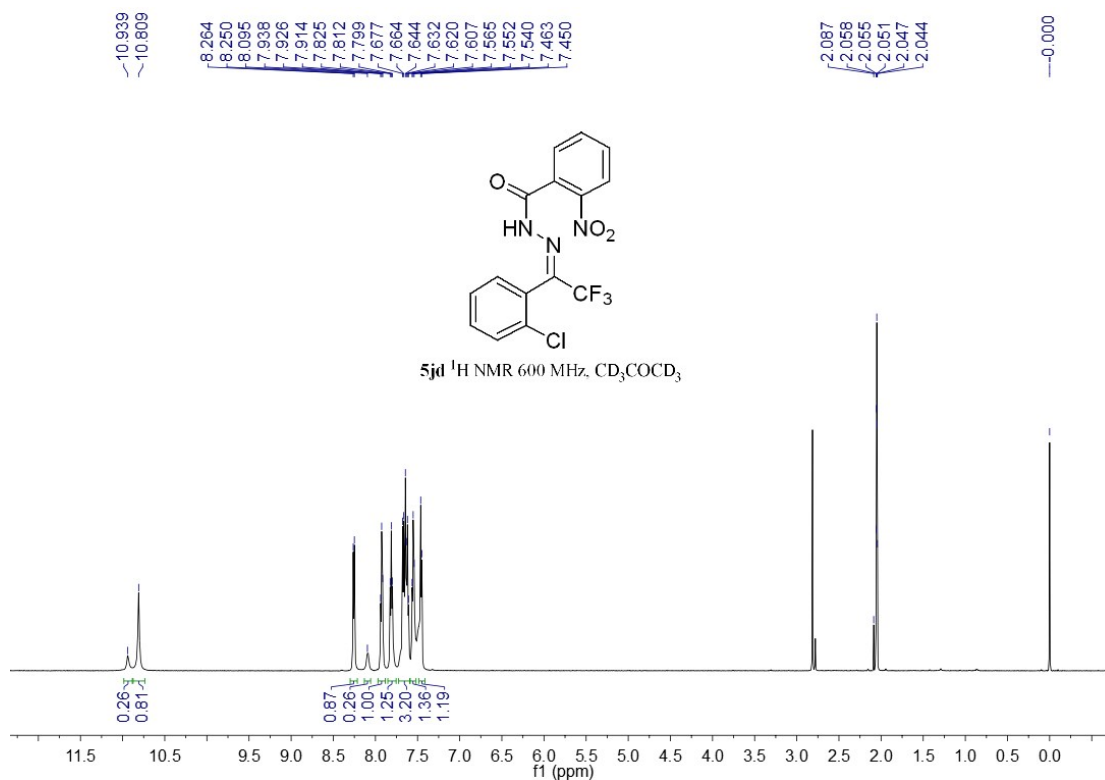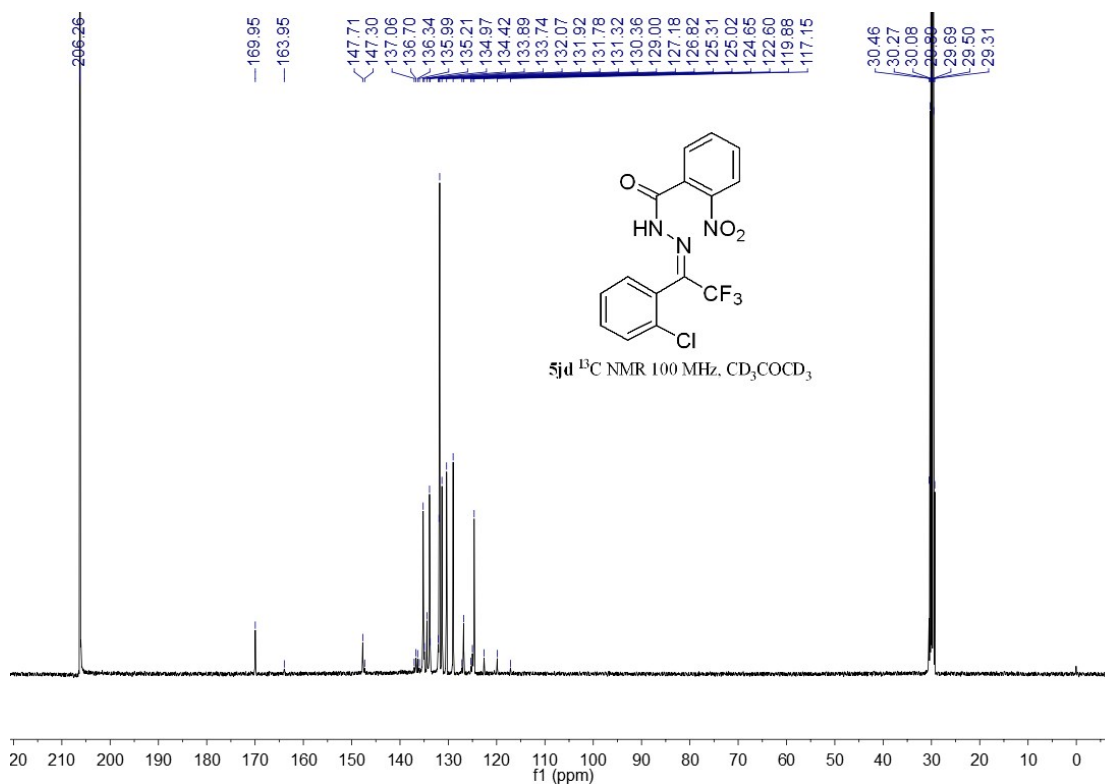

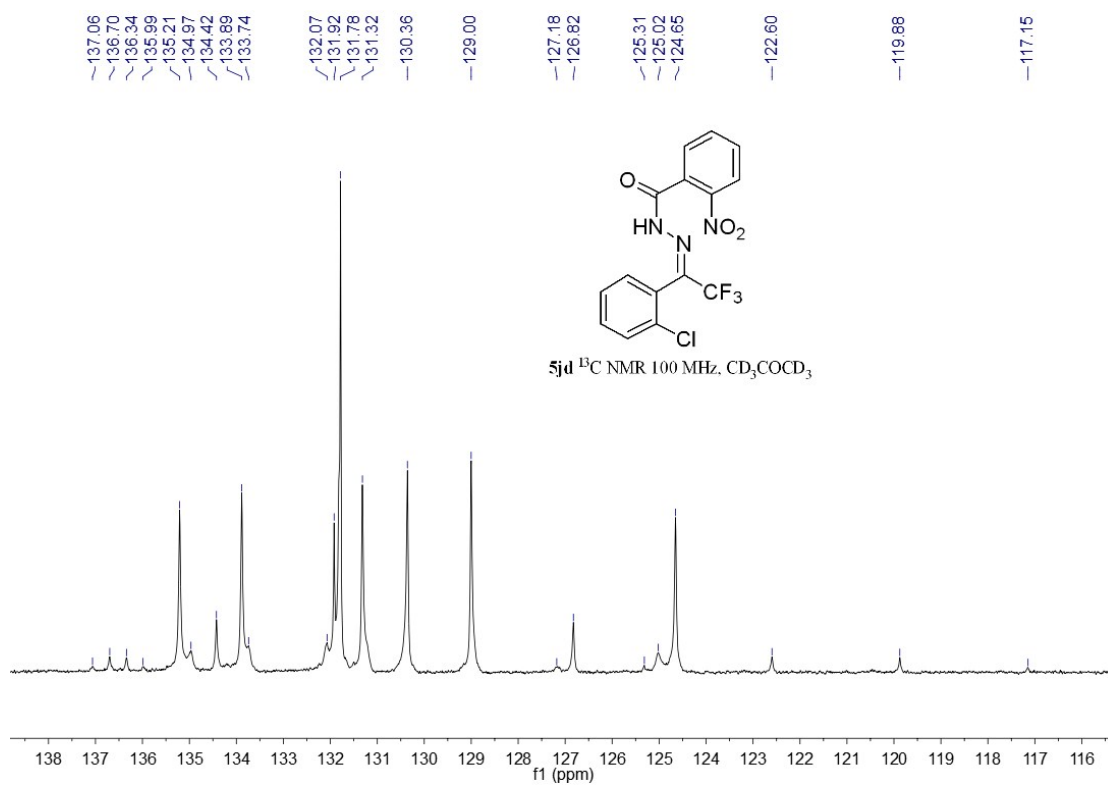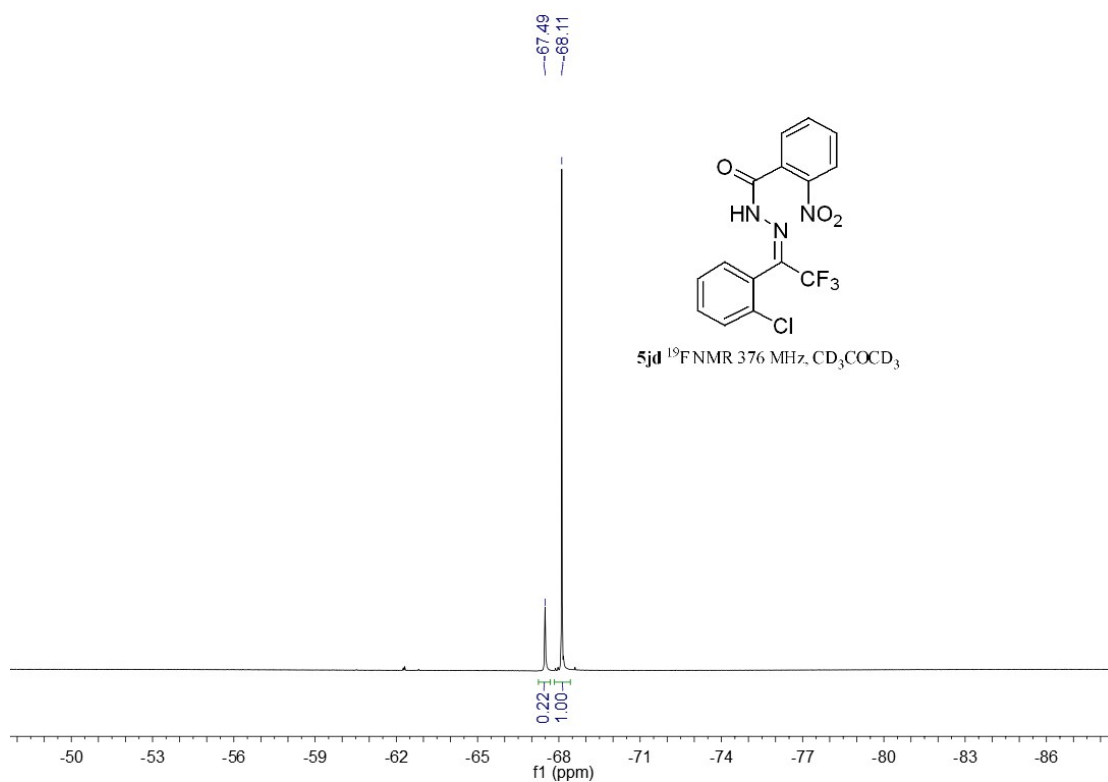

NMR copies of major product of compound **5je**:

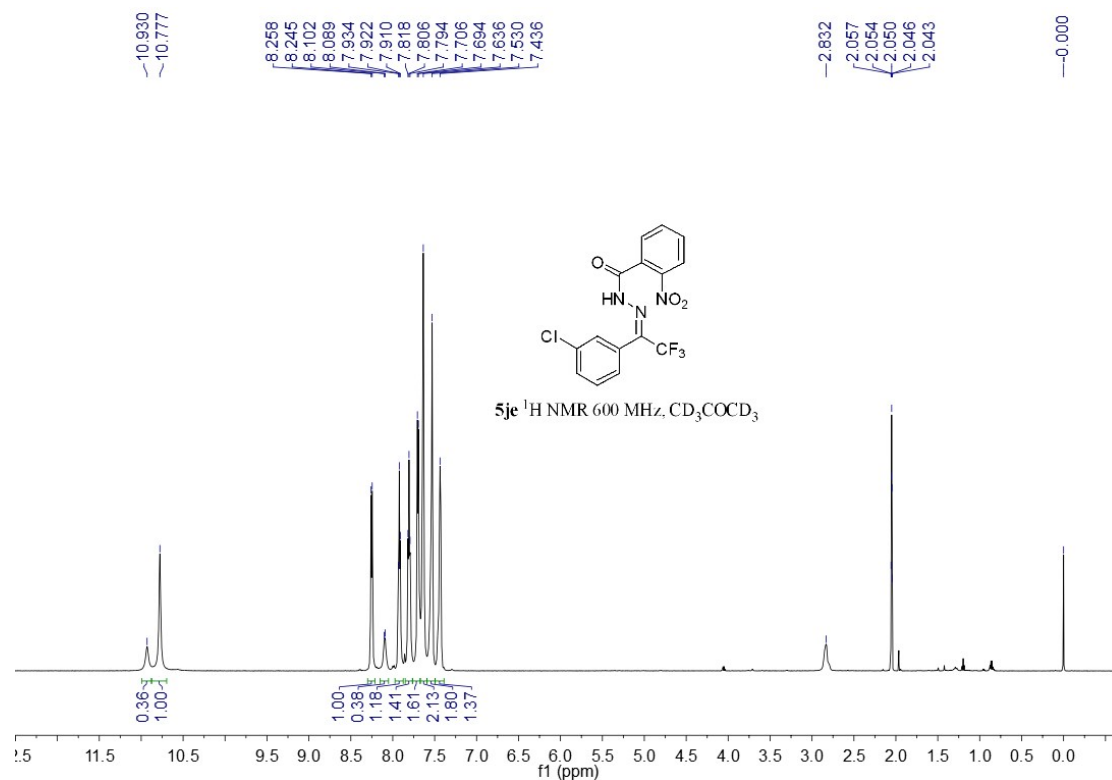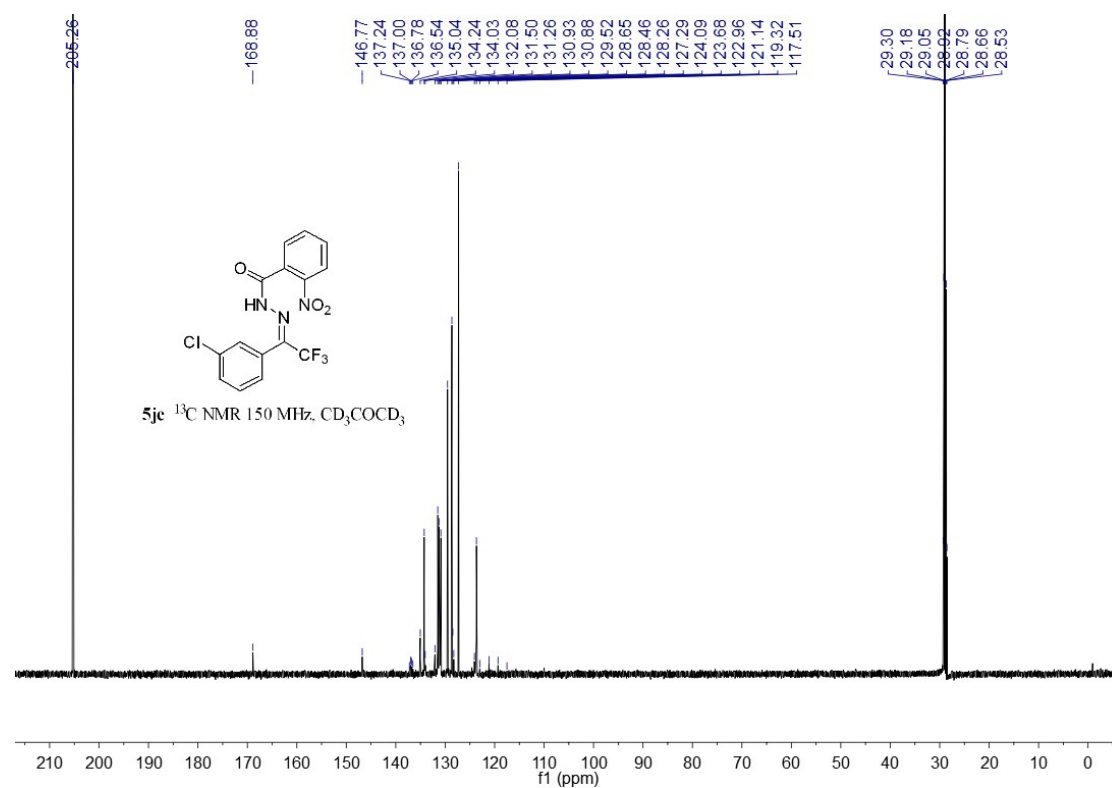

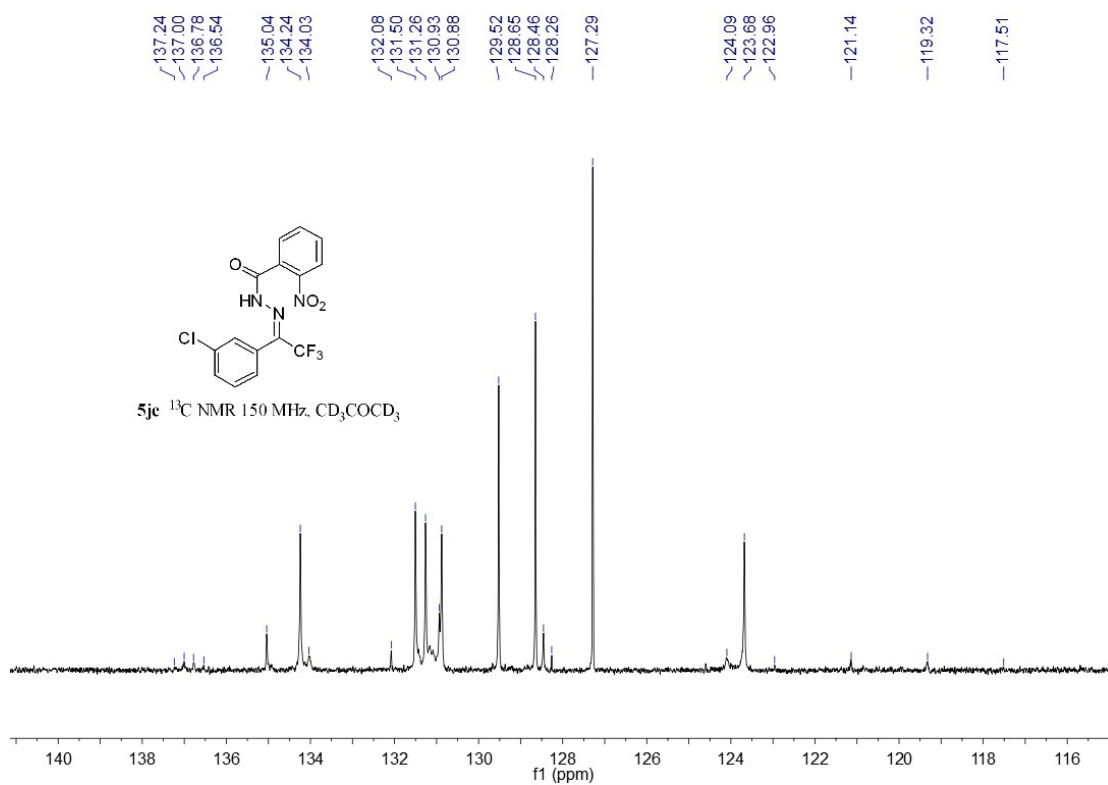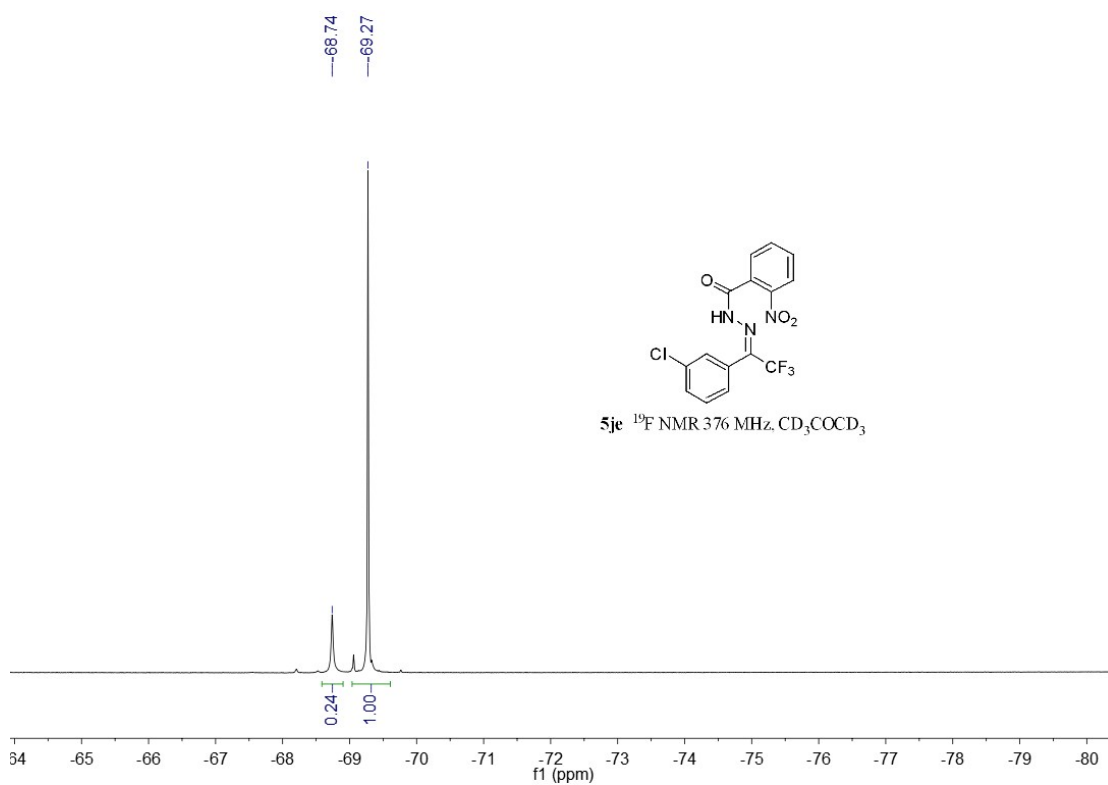



NMR copies of major product of compound **5jf**:

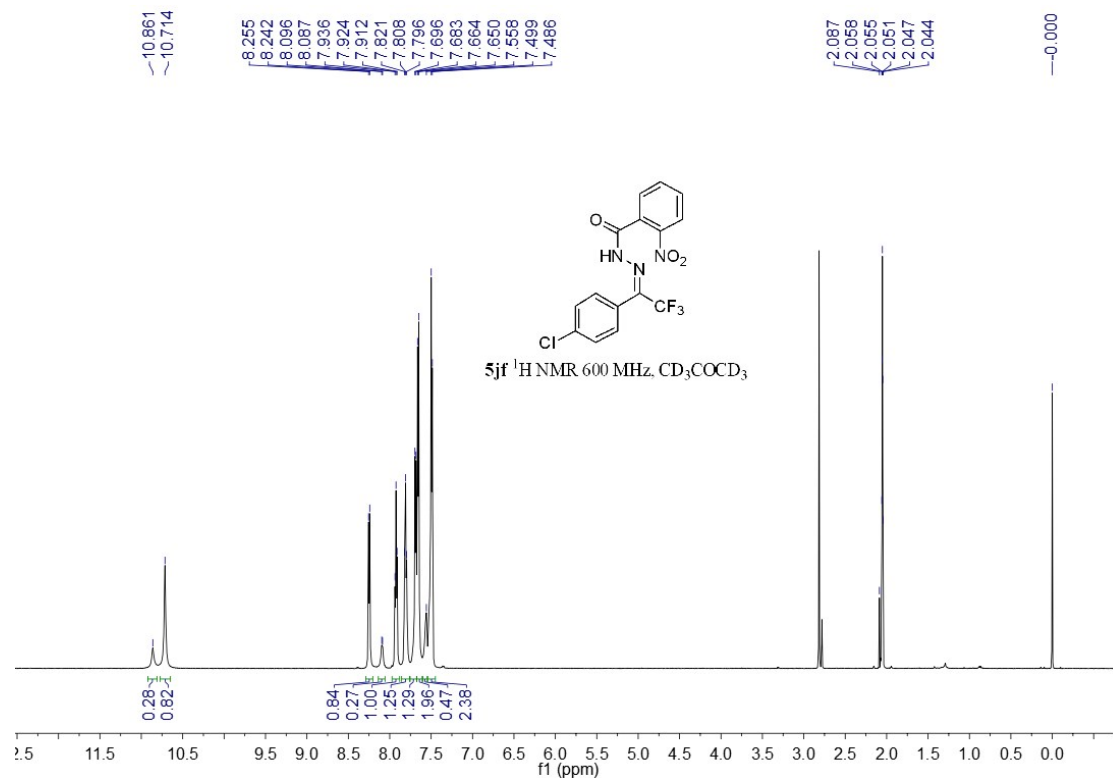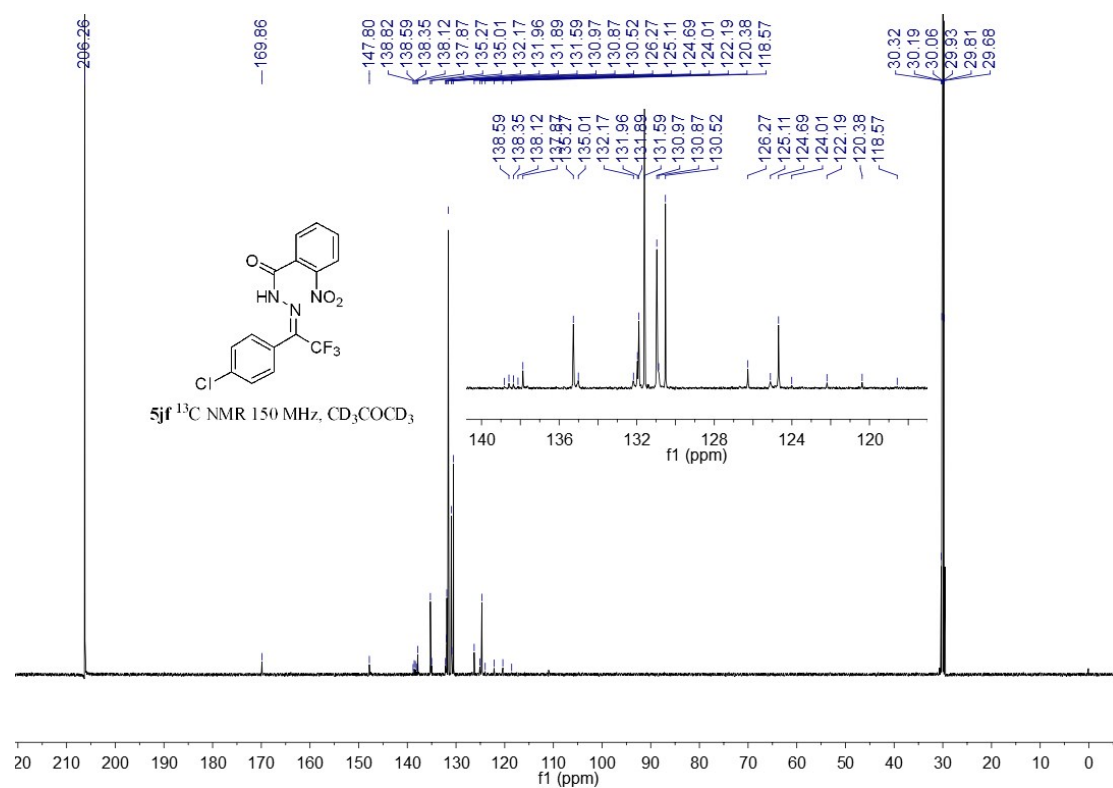

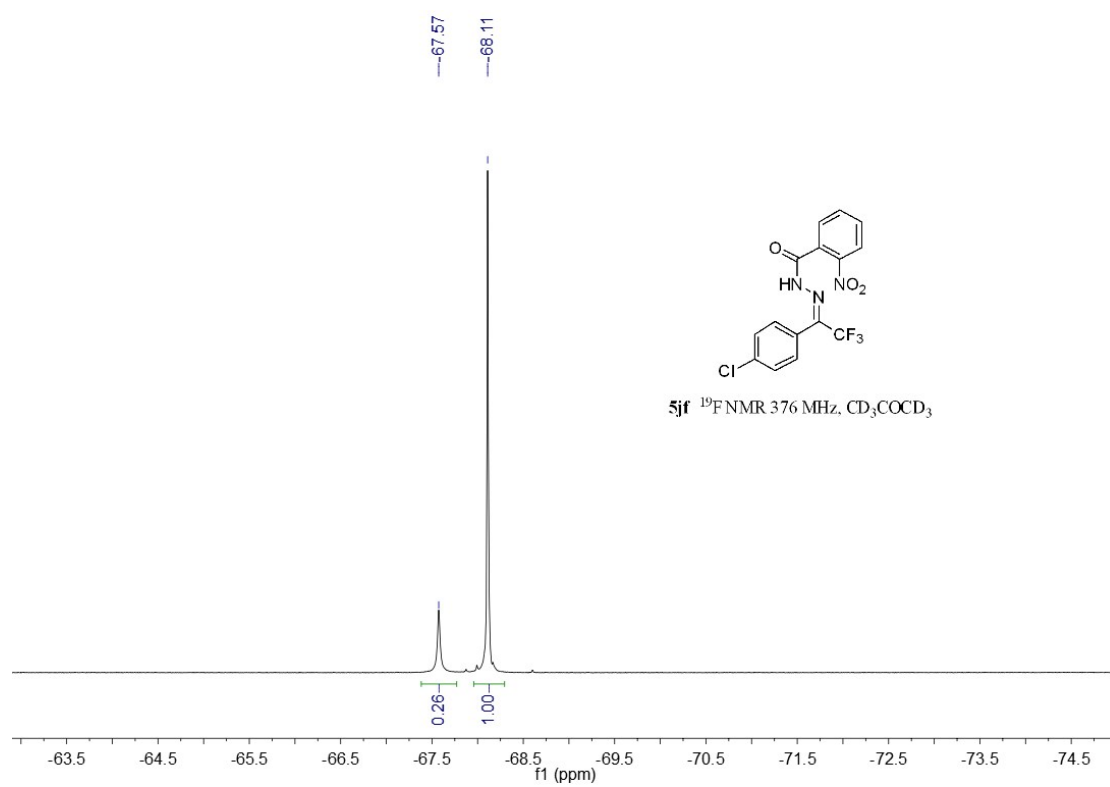

NMR copies of major product of compound **5jg**:

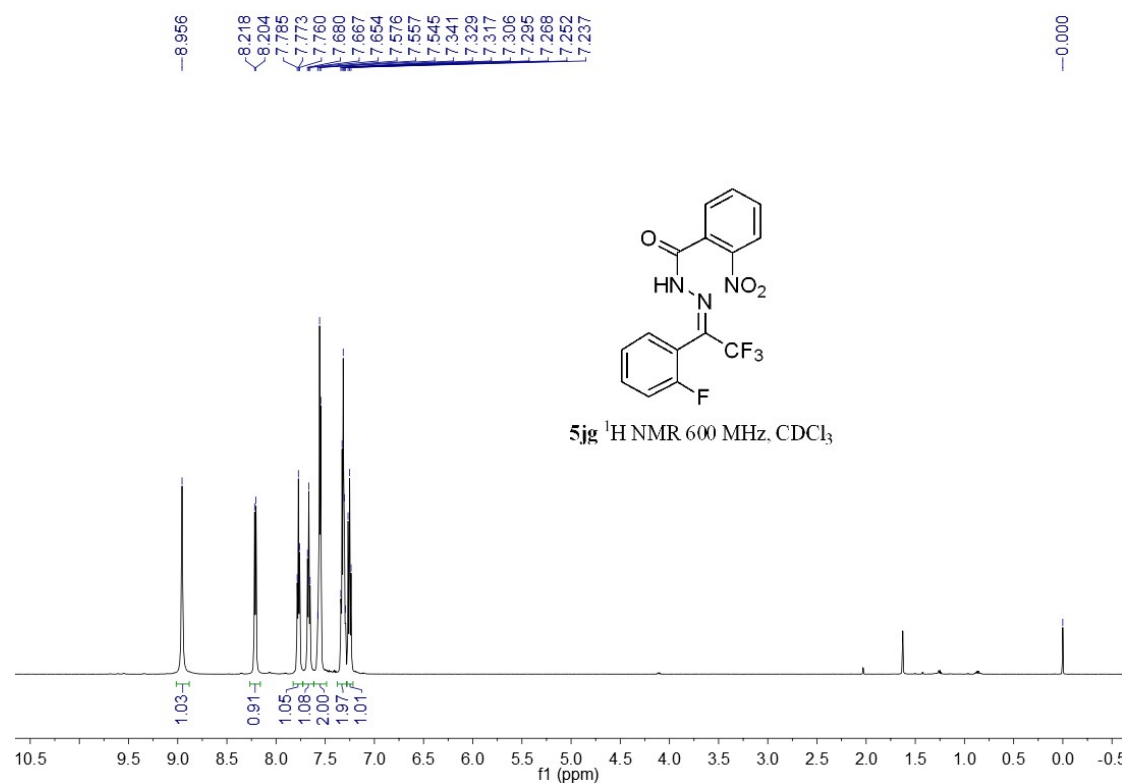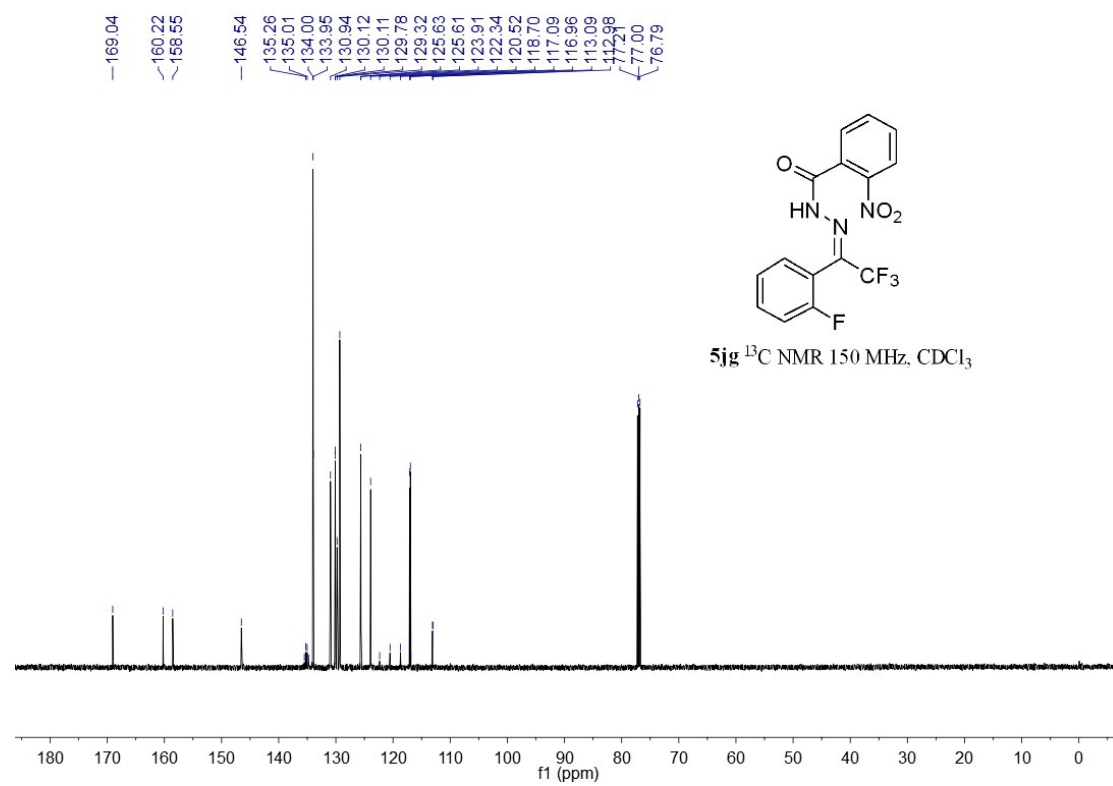

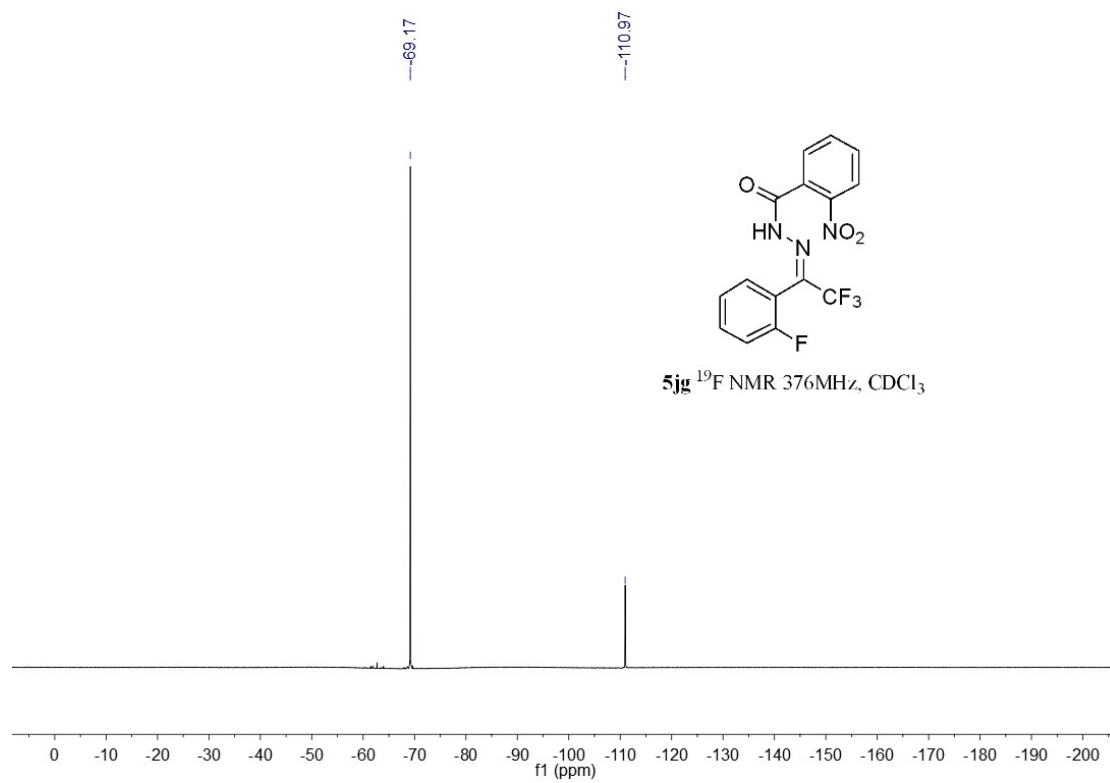

NMR copies of major product of compound **5jh**:

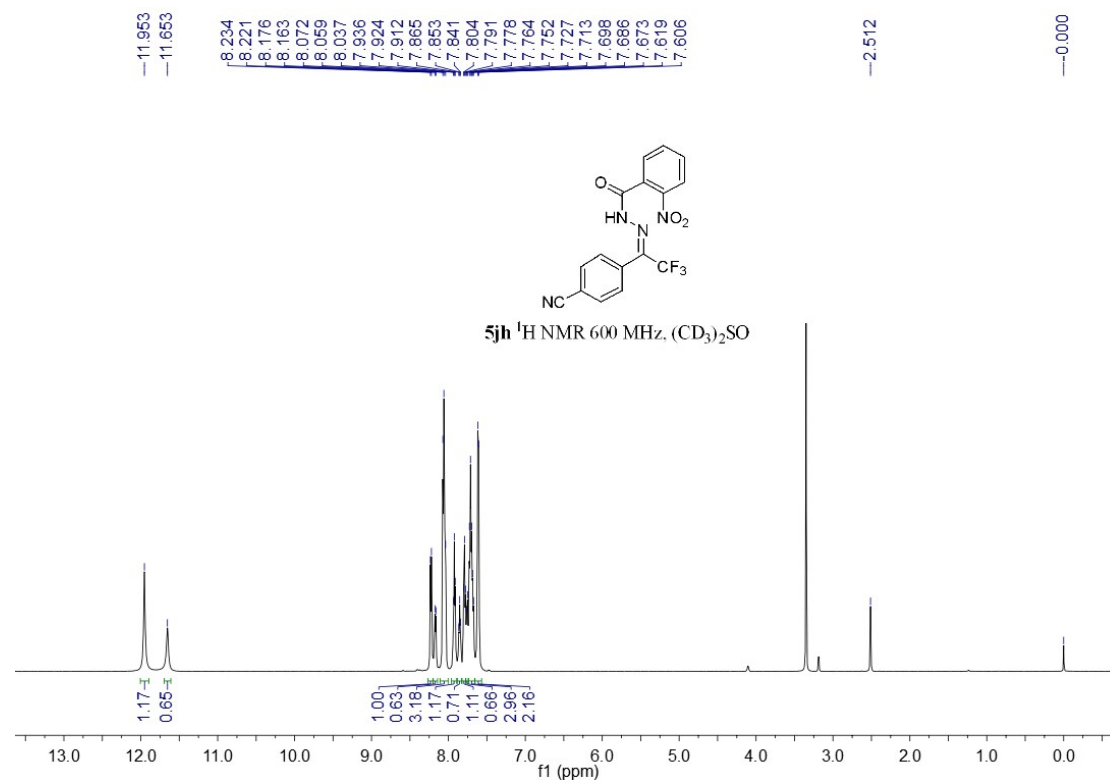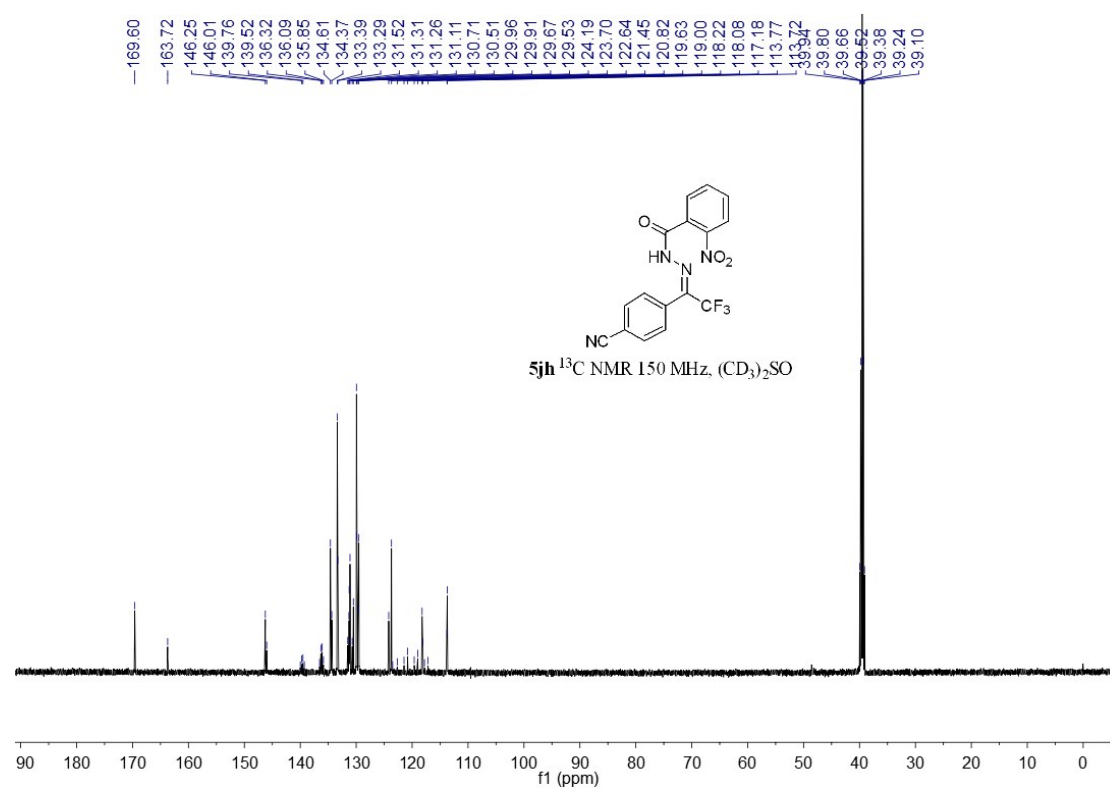

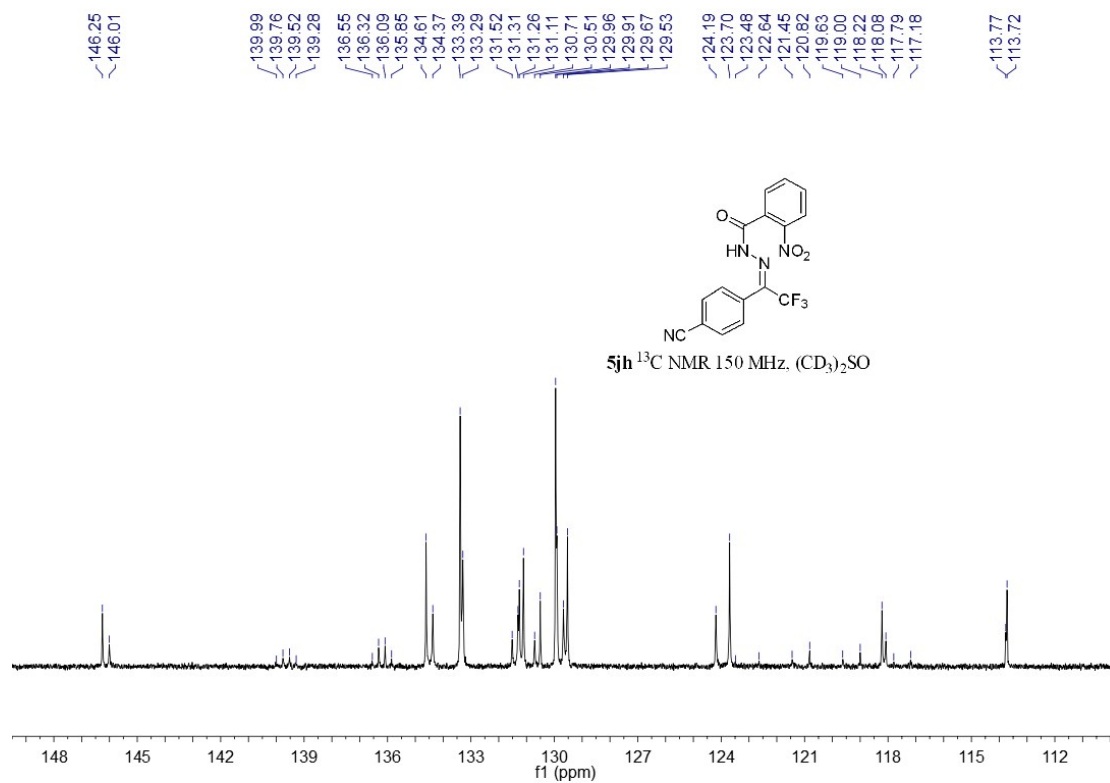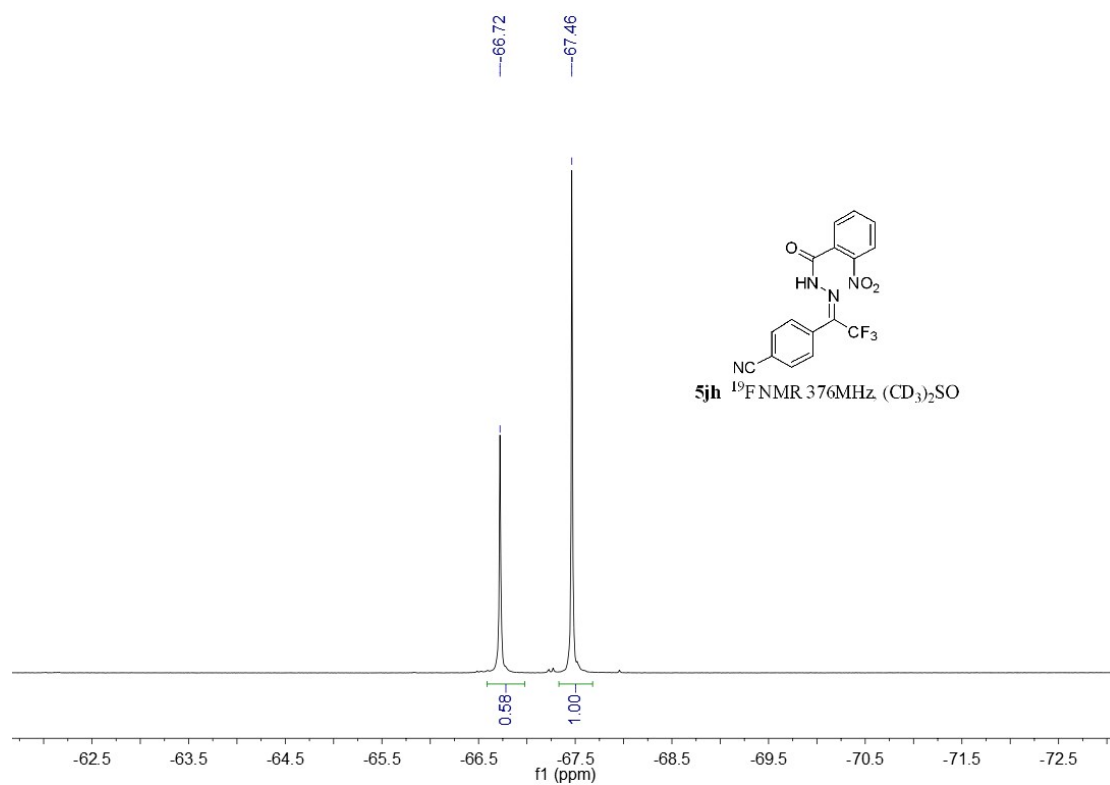

NMR copies of major product of compound **5ji**:

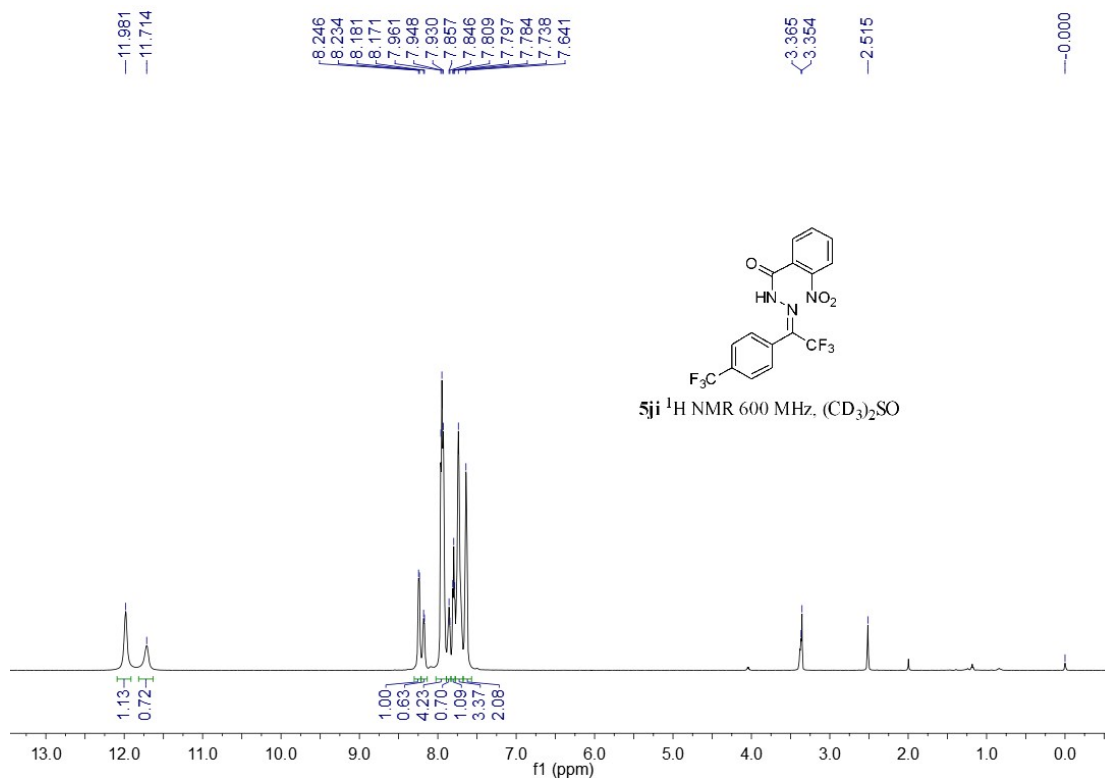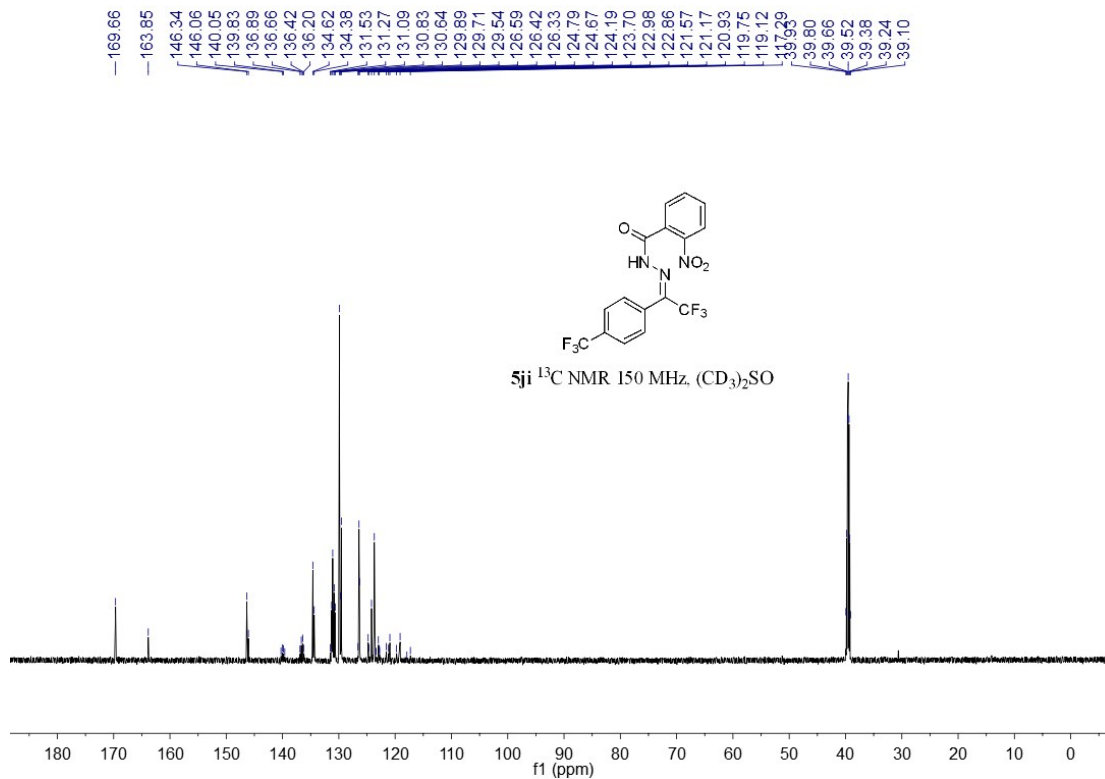

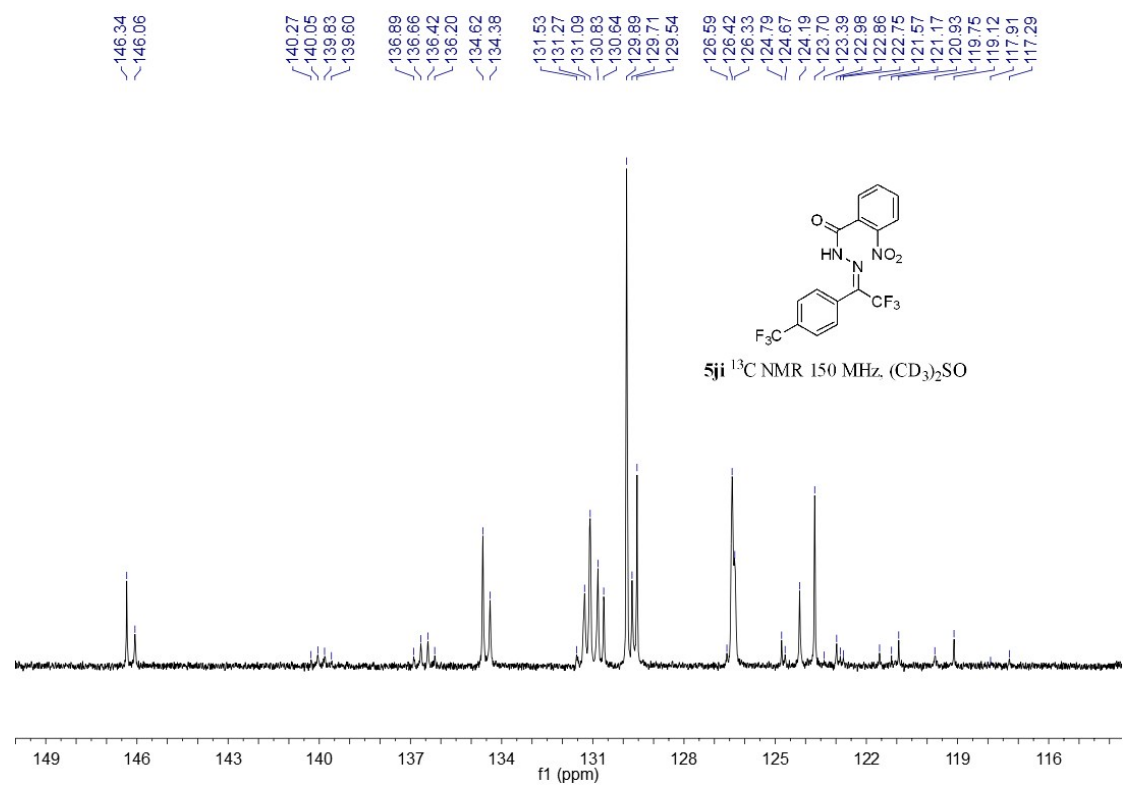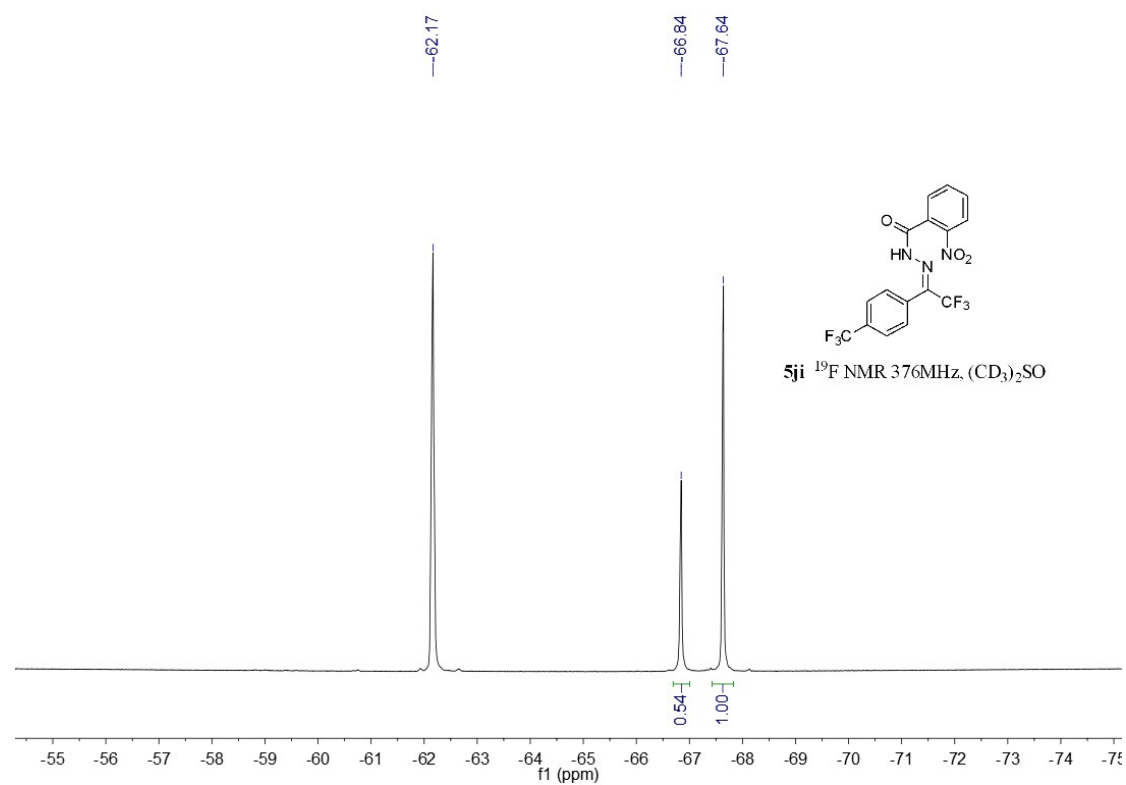



NMR copies of major product of compound **5jj**:

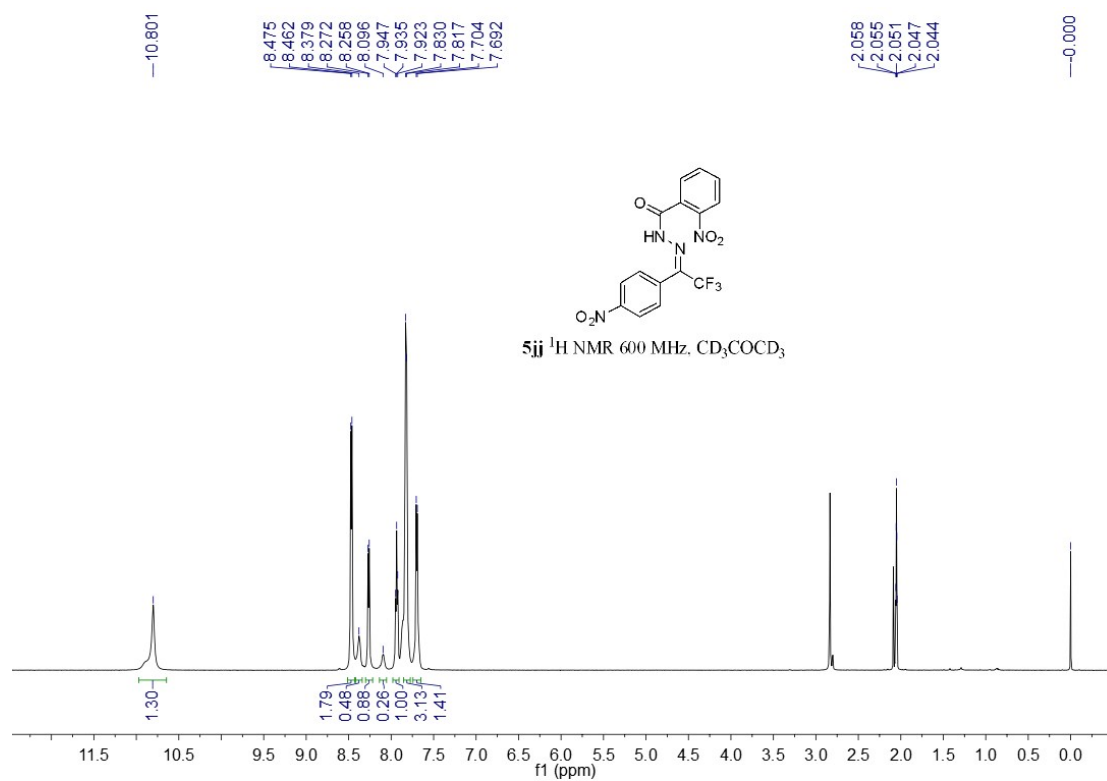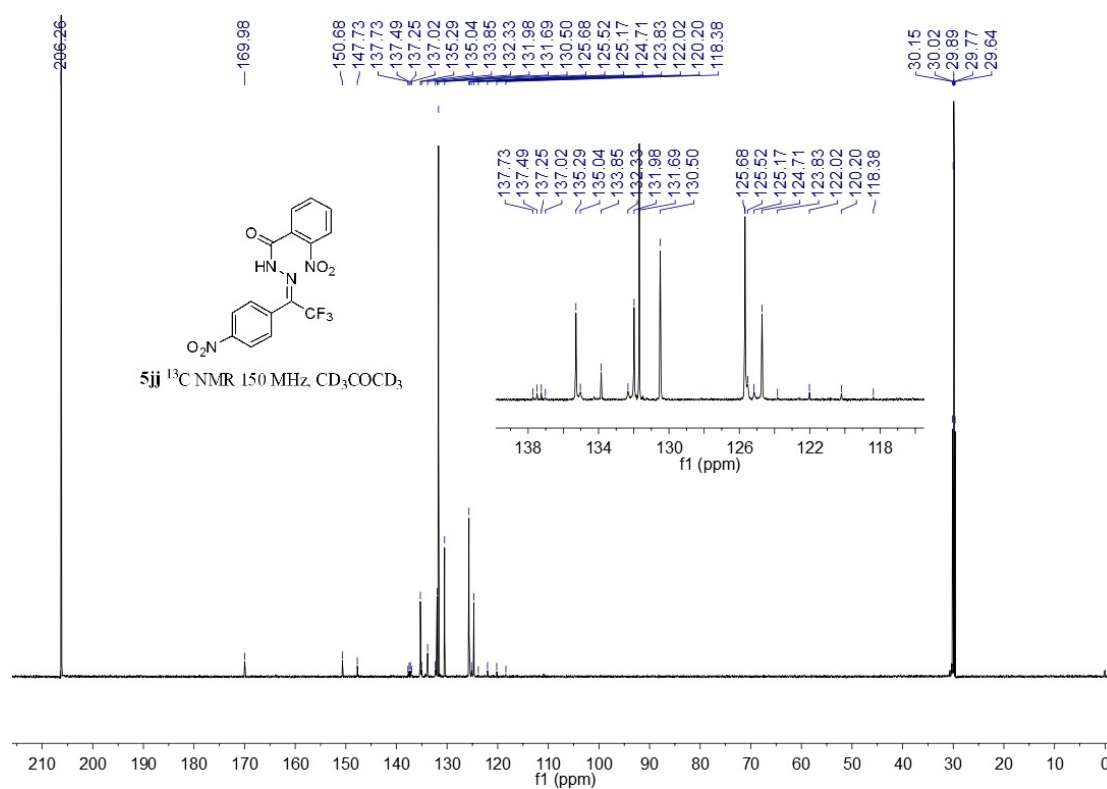

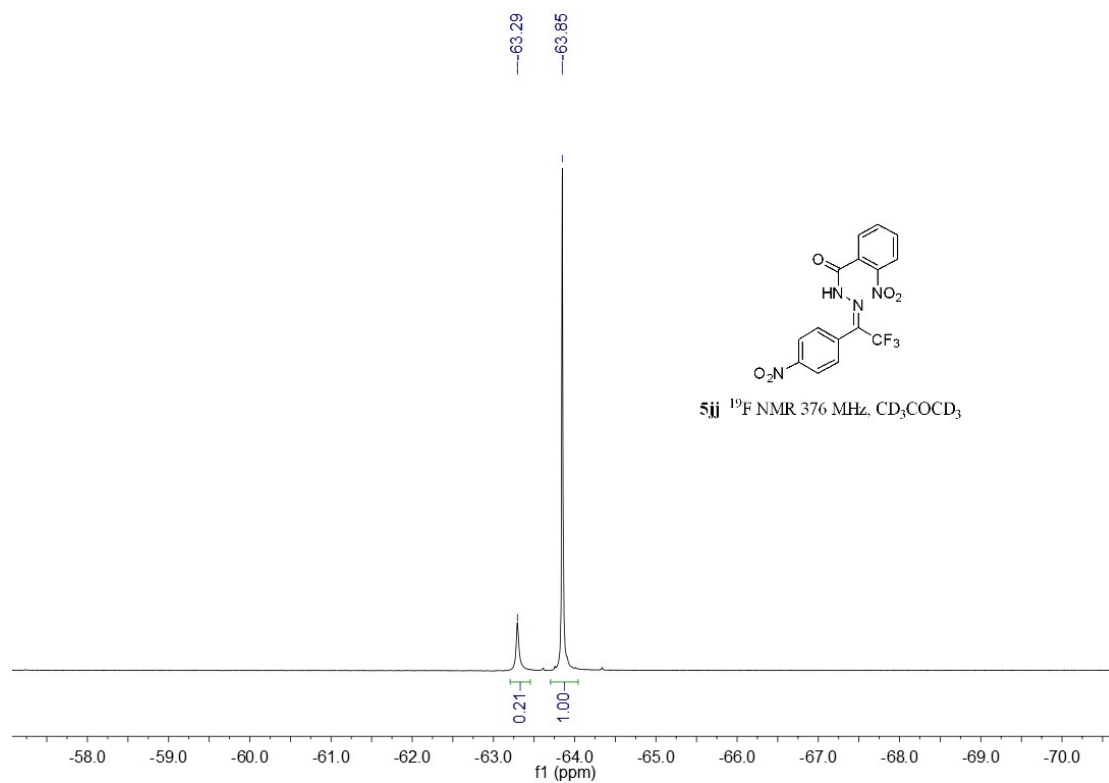

NMR copies of major product of compound **5jk**:

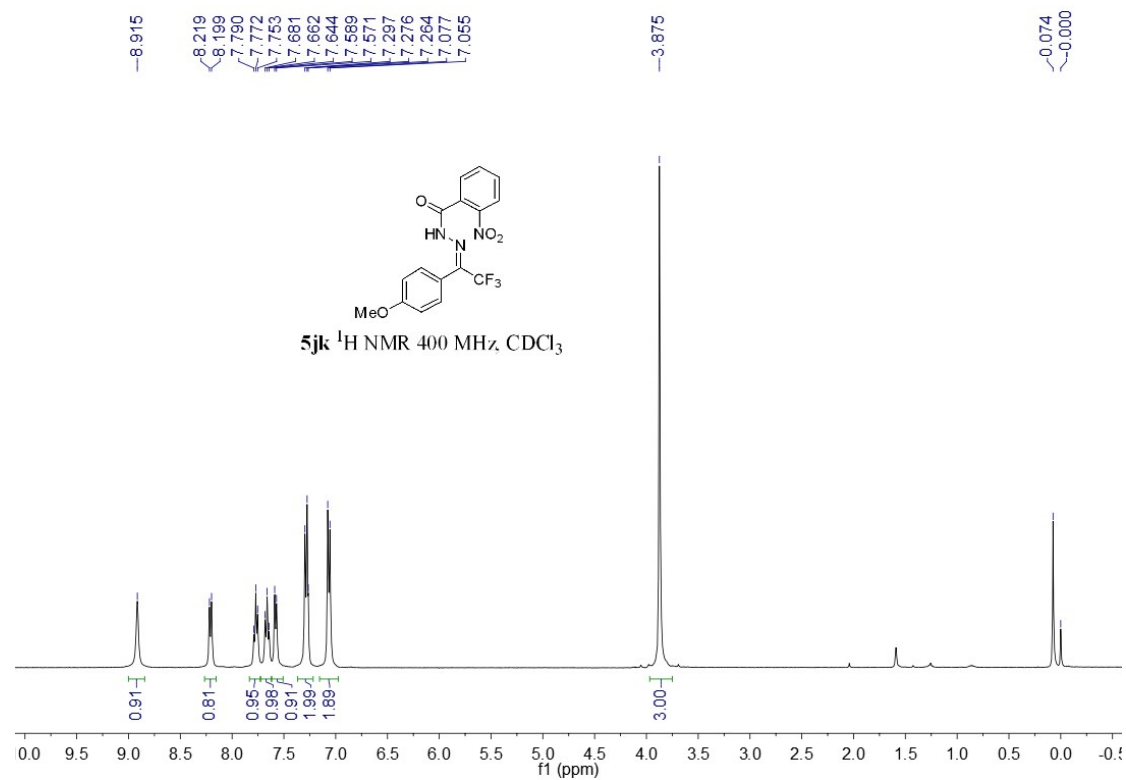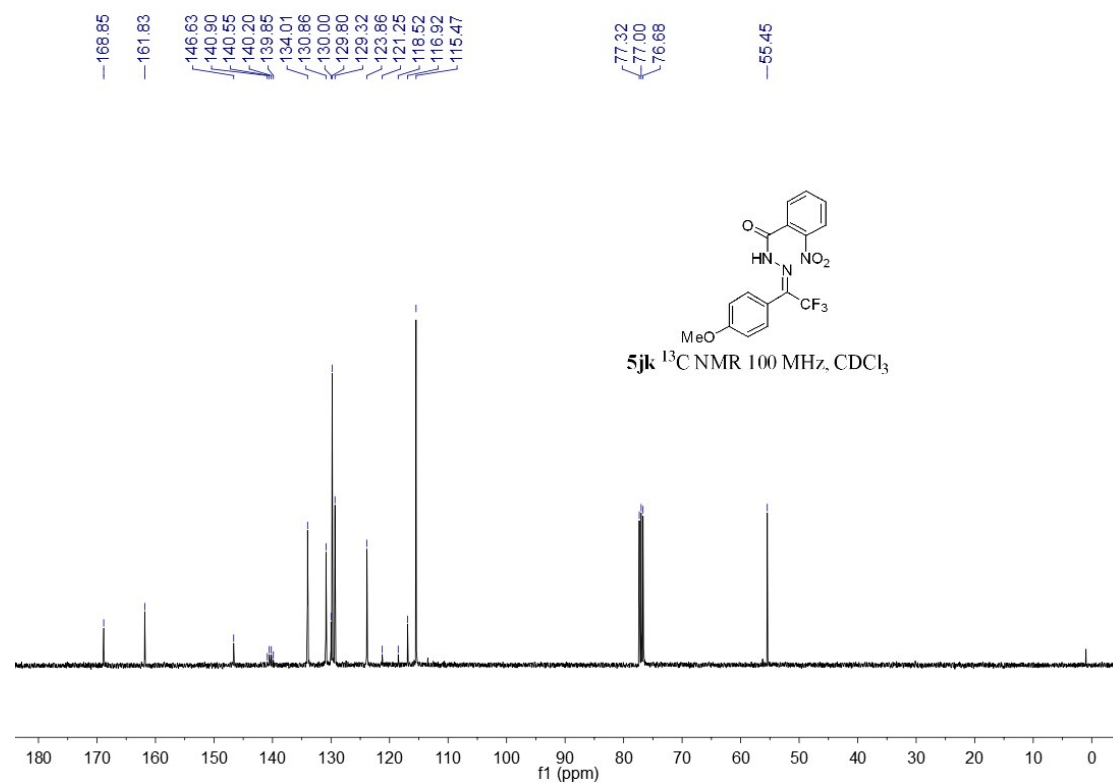

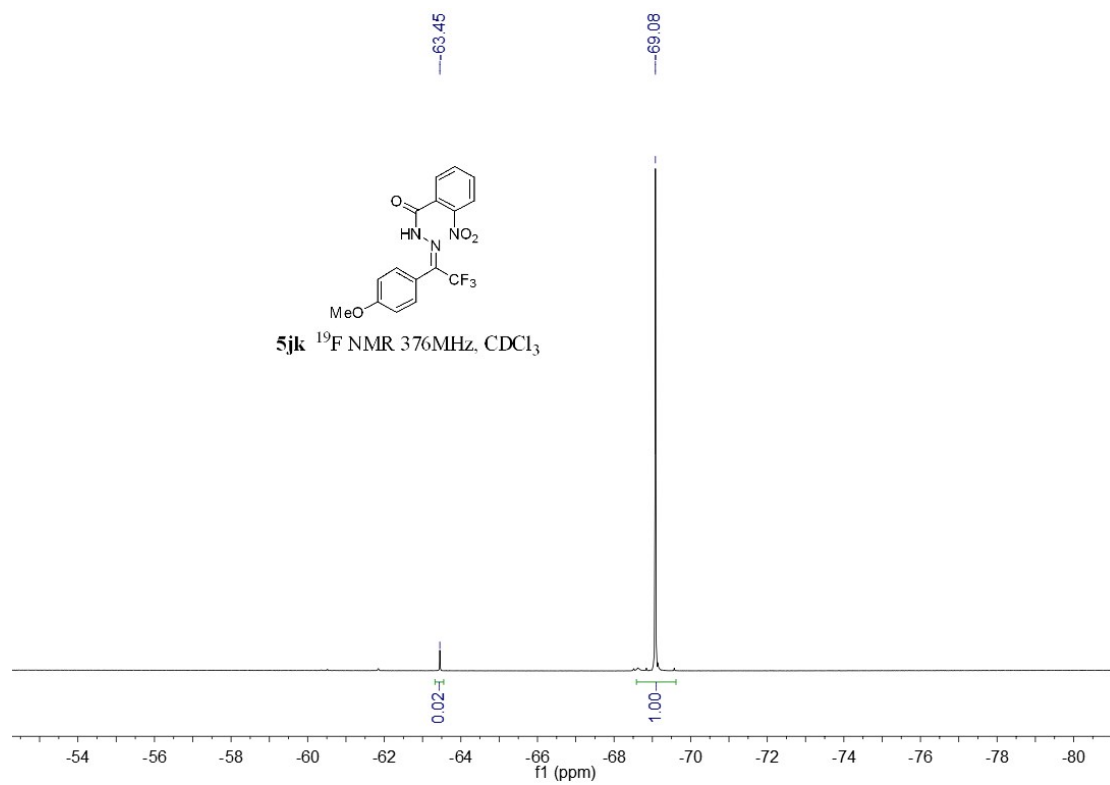

NMR copies of major product of compound **5jm**:

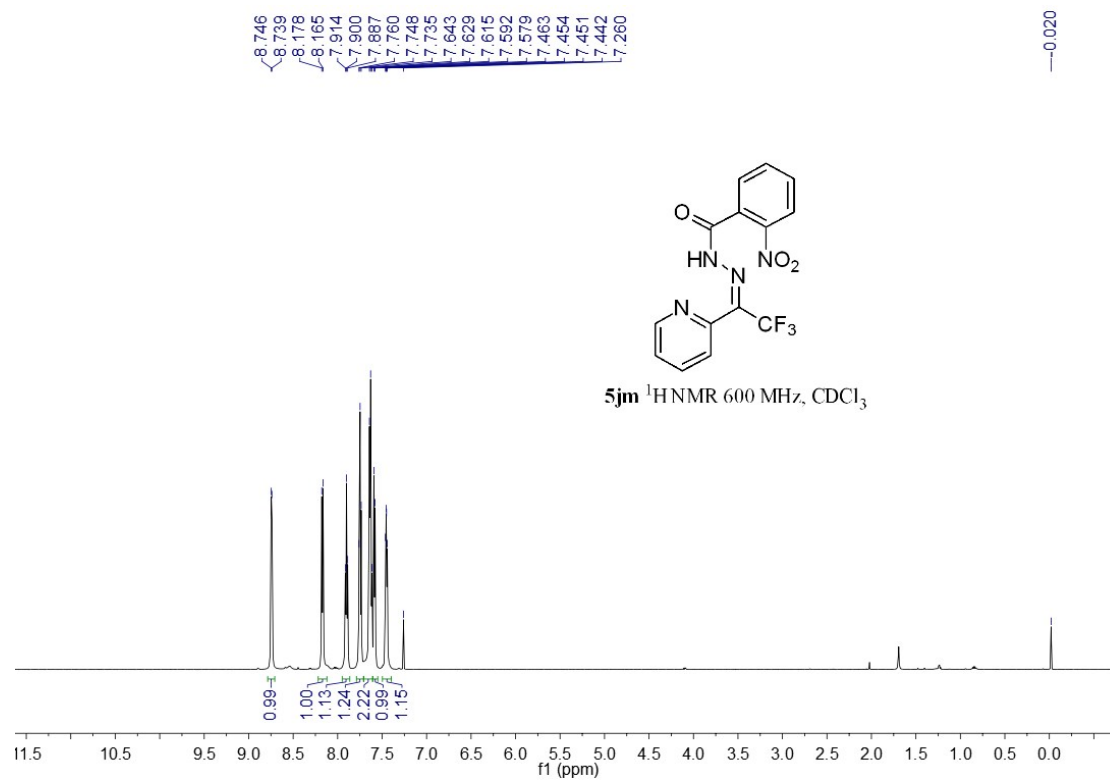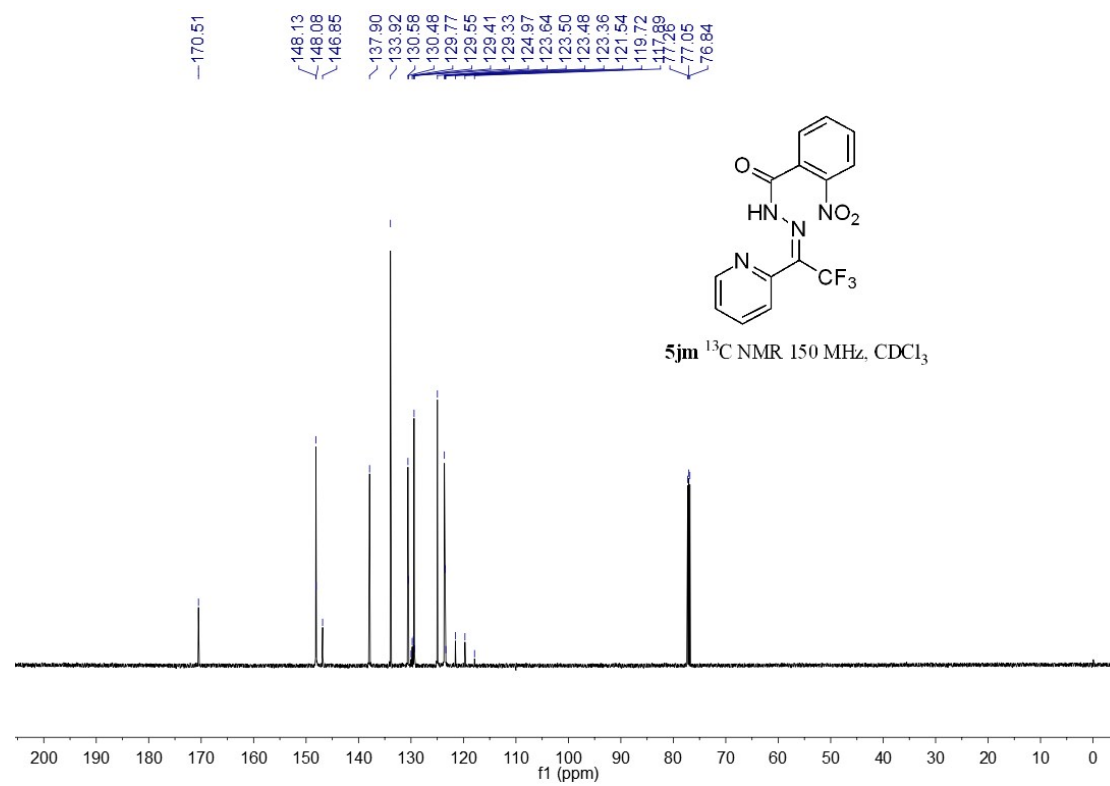

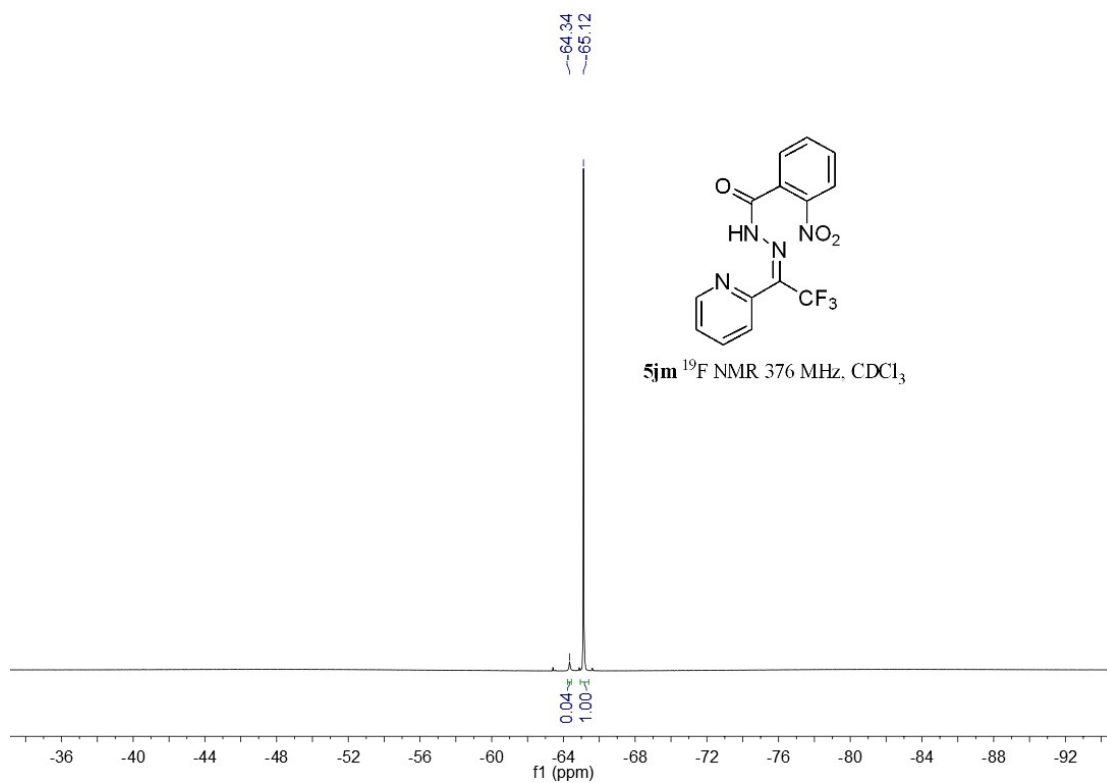

NMR copies of major product of compound **5jp**:

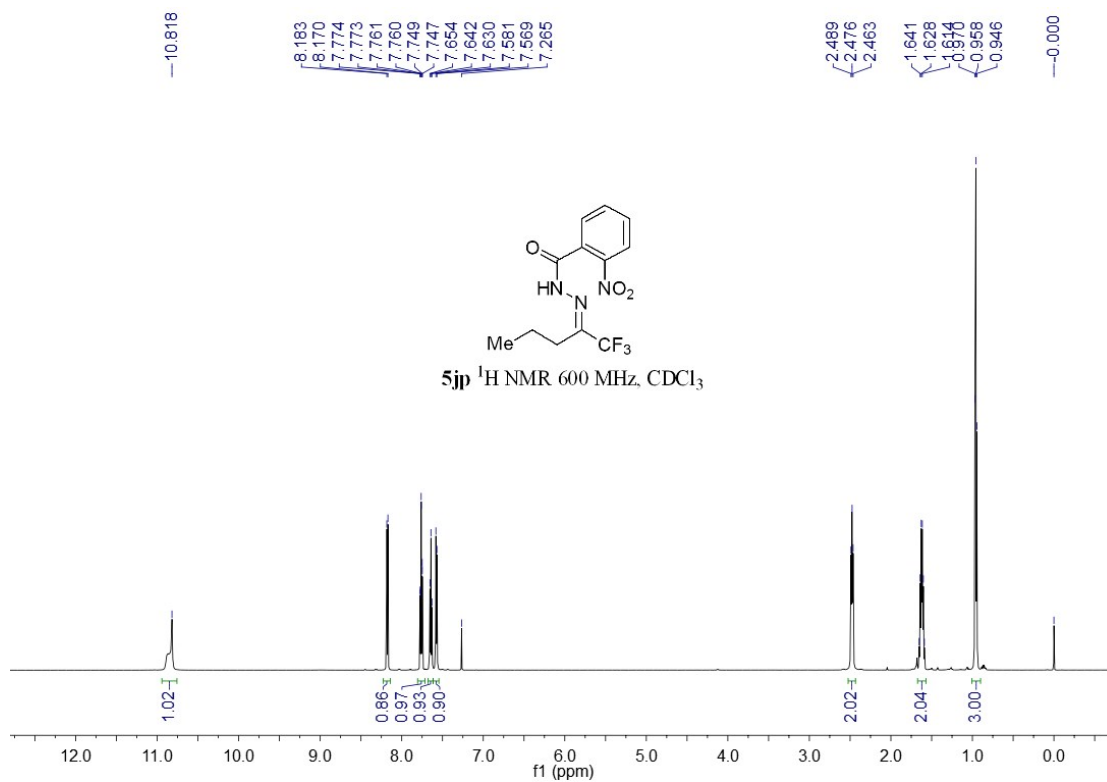

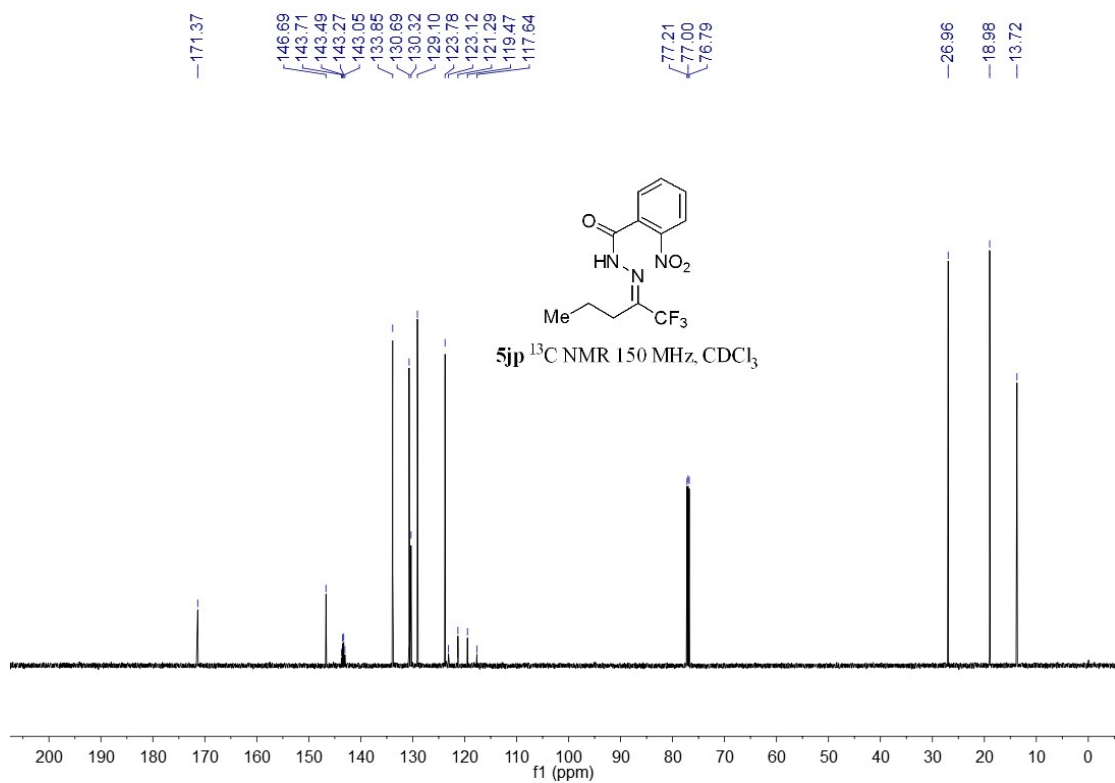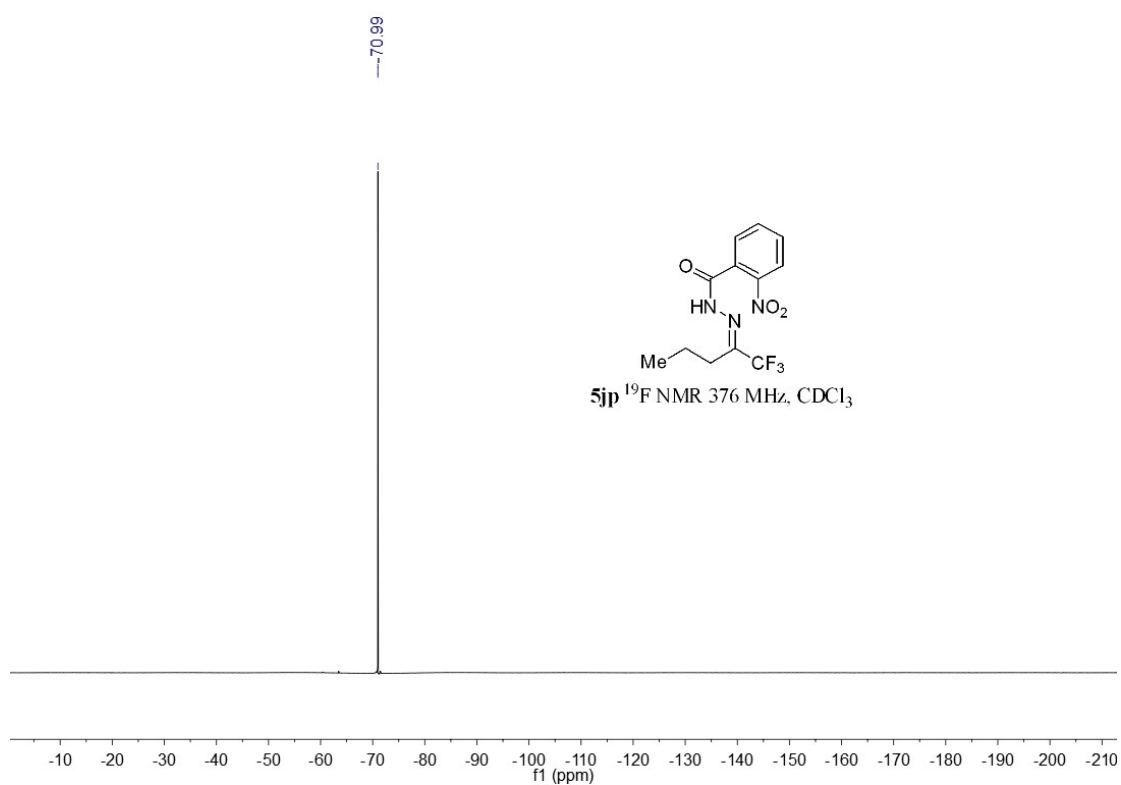

NMR copies of major product of compound **5jq**:

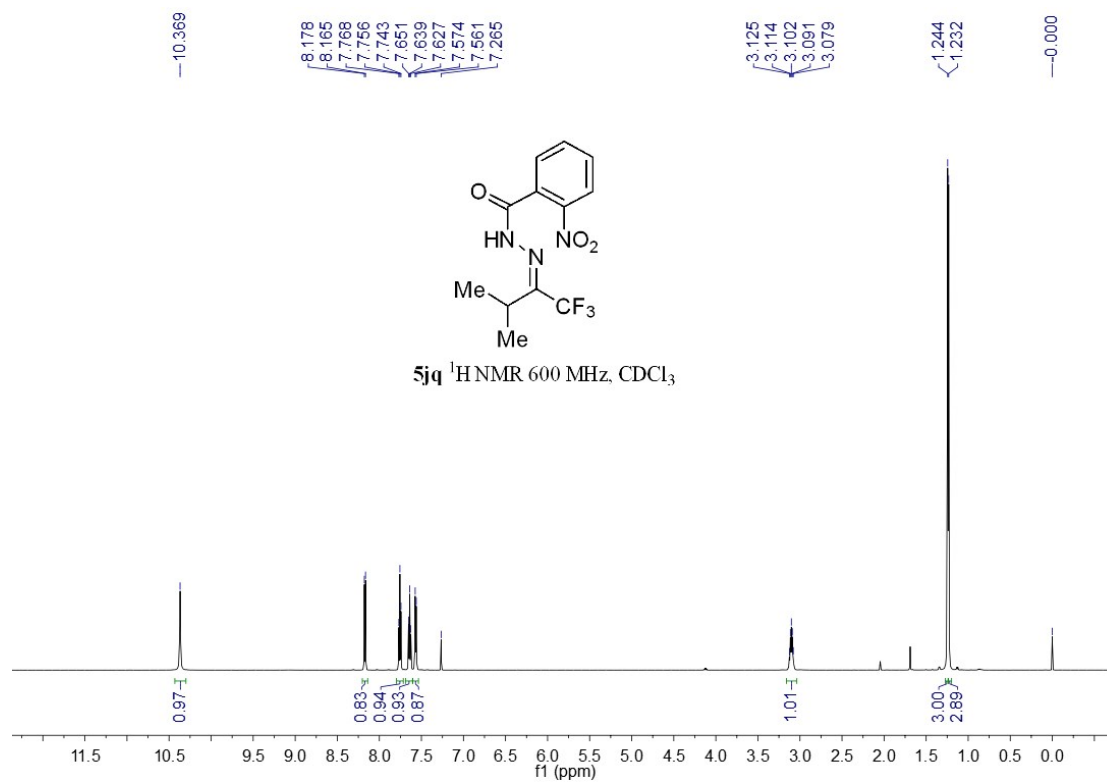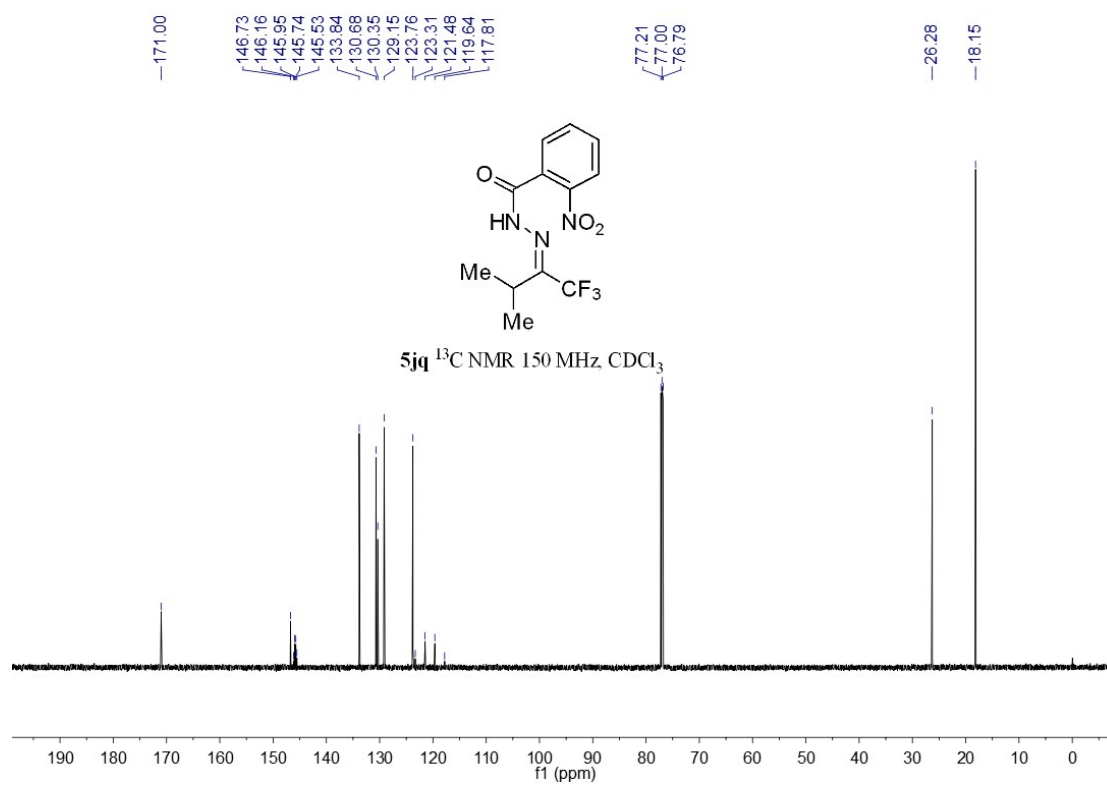



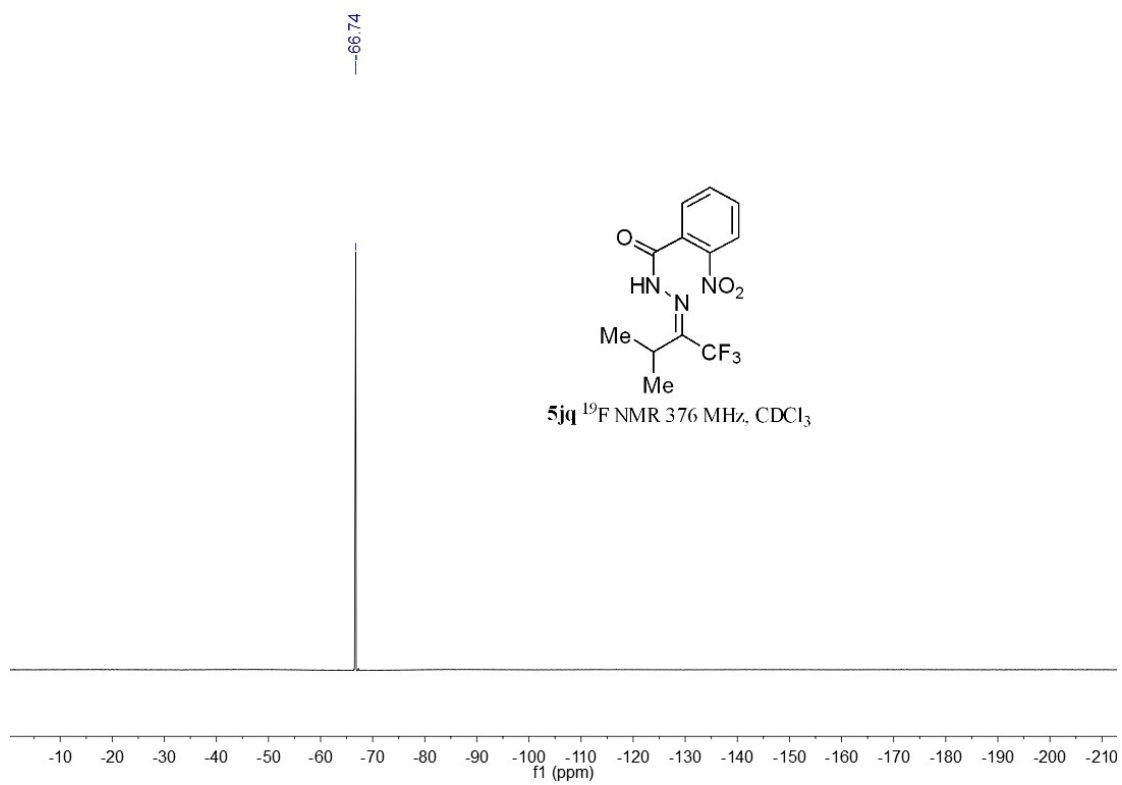

NMR copies of major product of compound **5jr**:

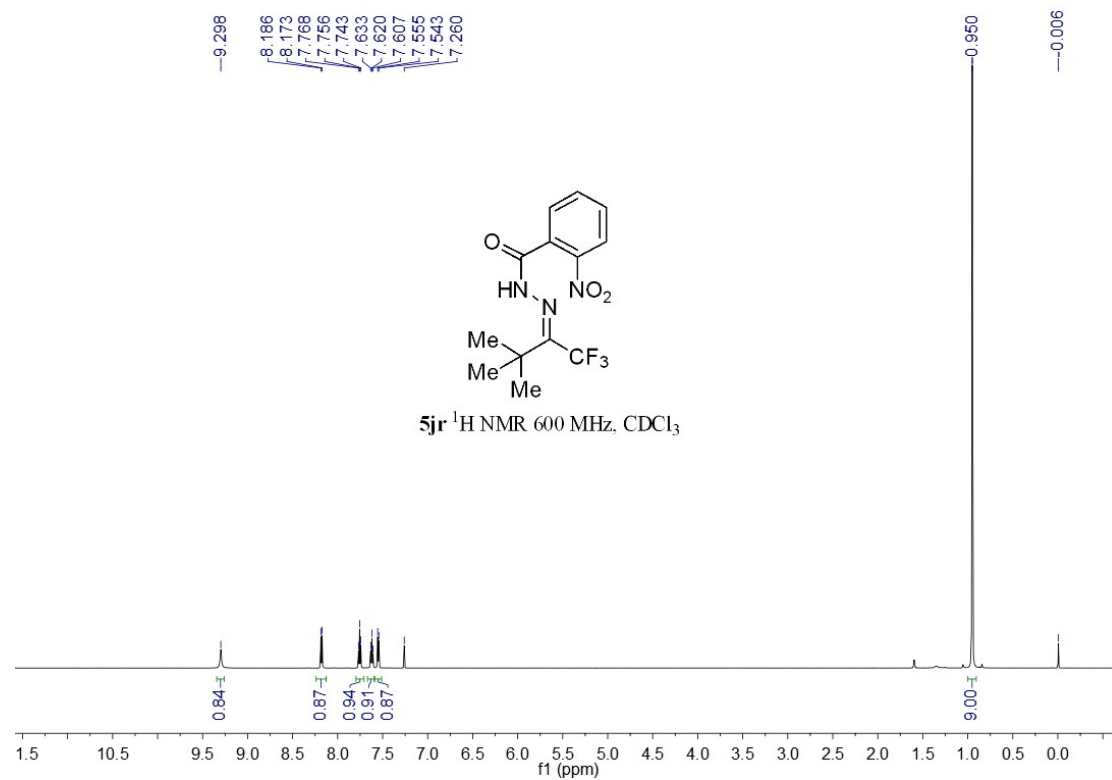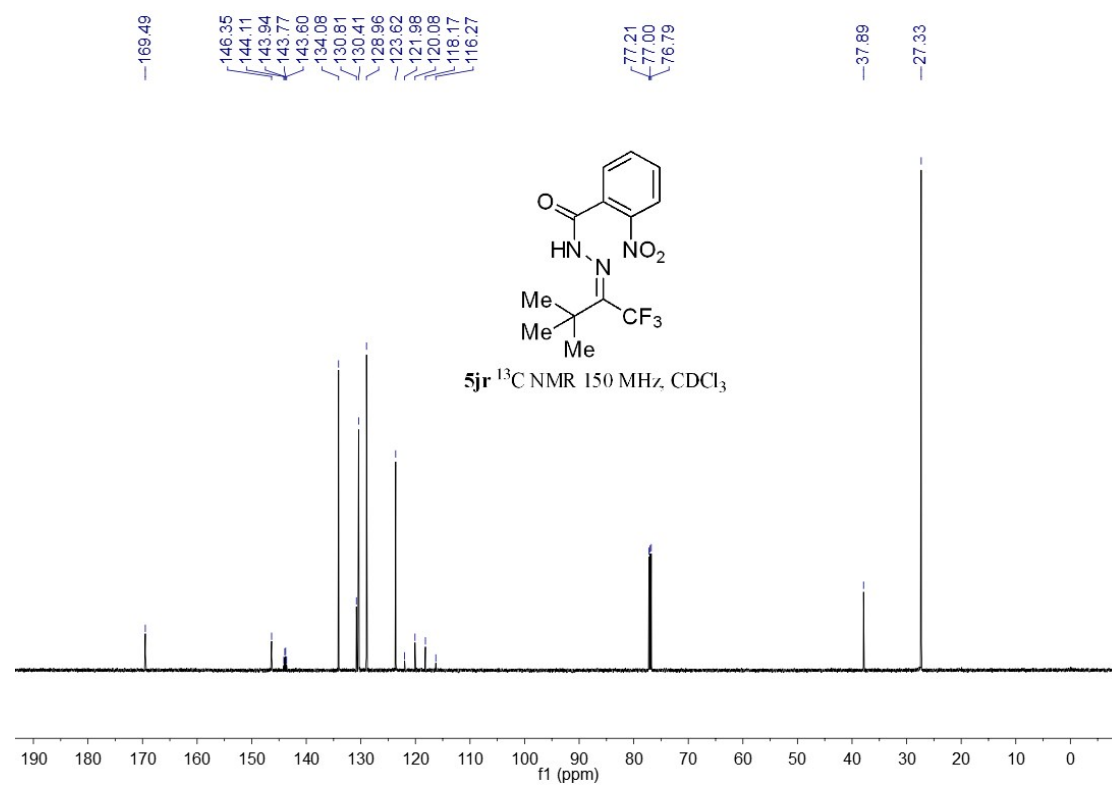

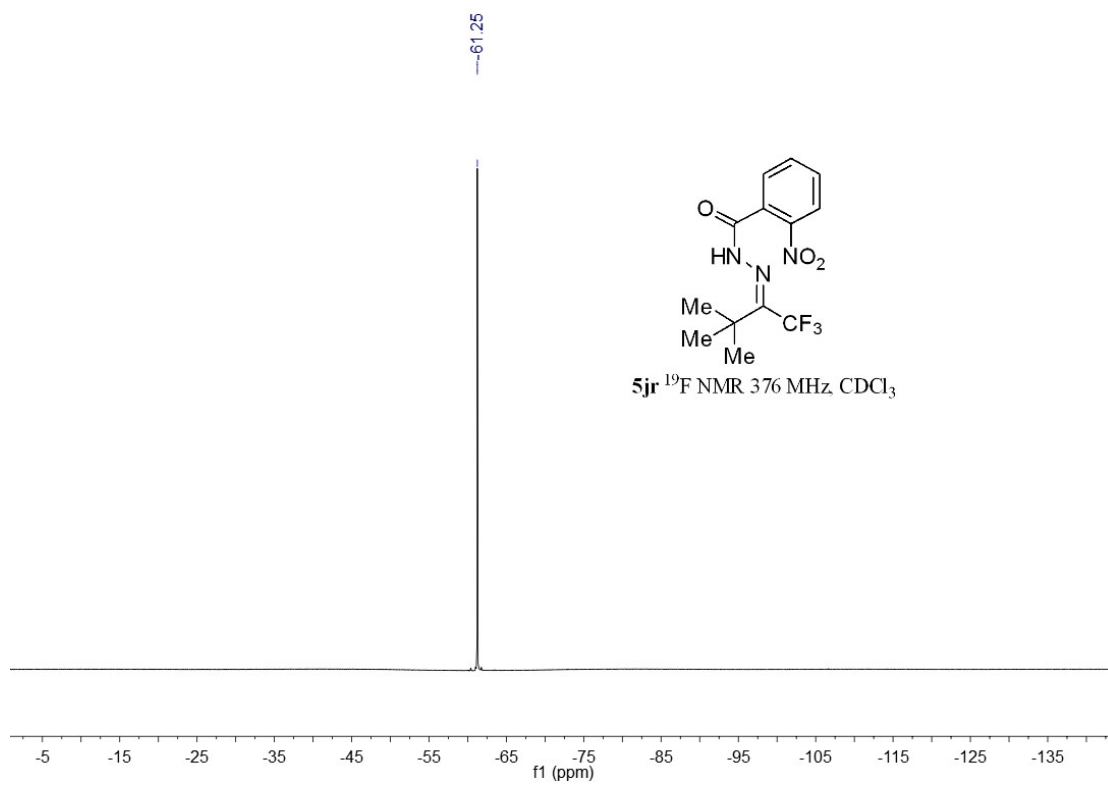

NMR copies of major product of compound **5js**:

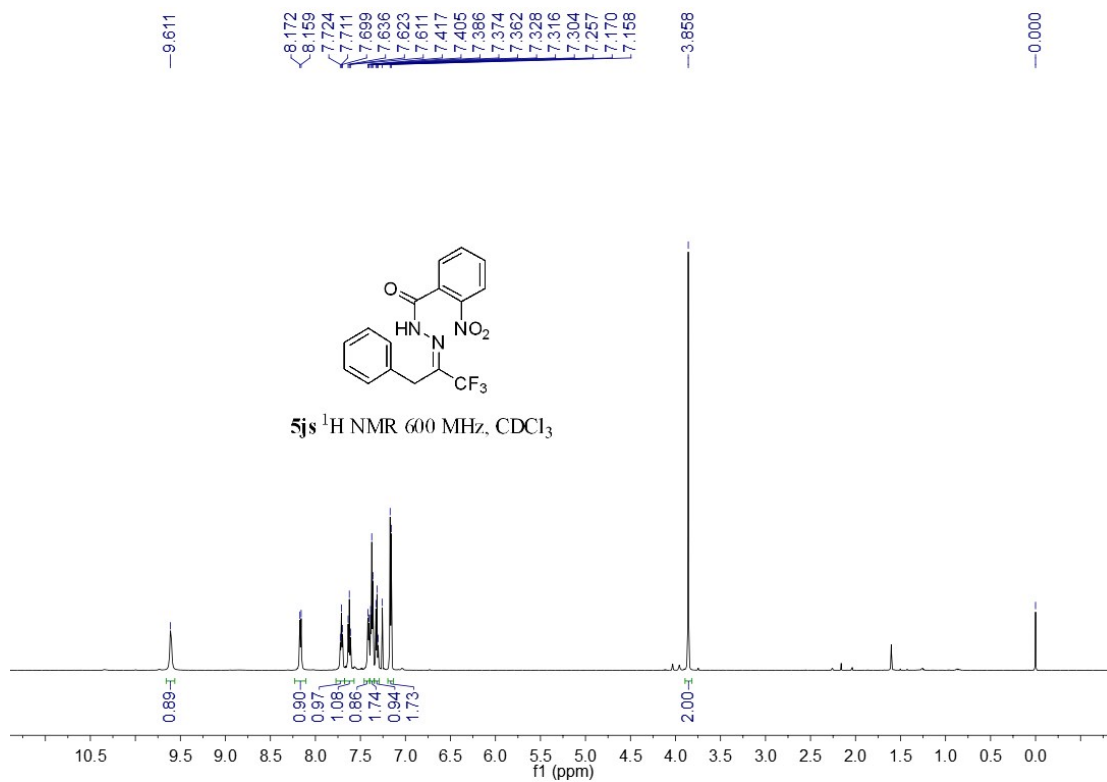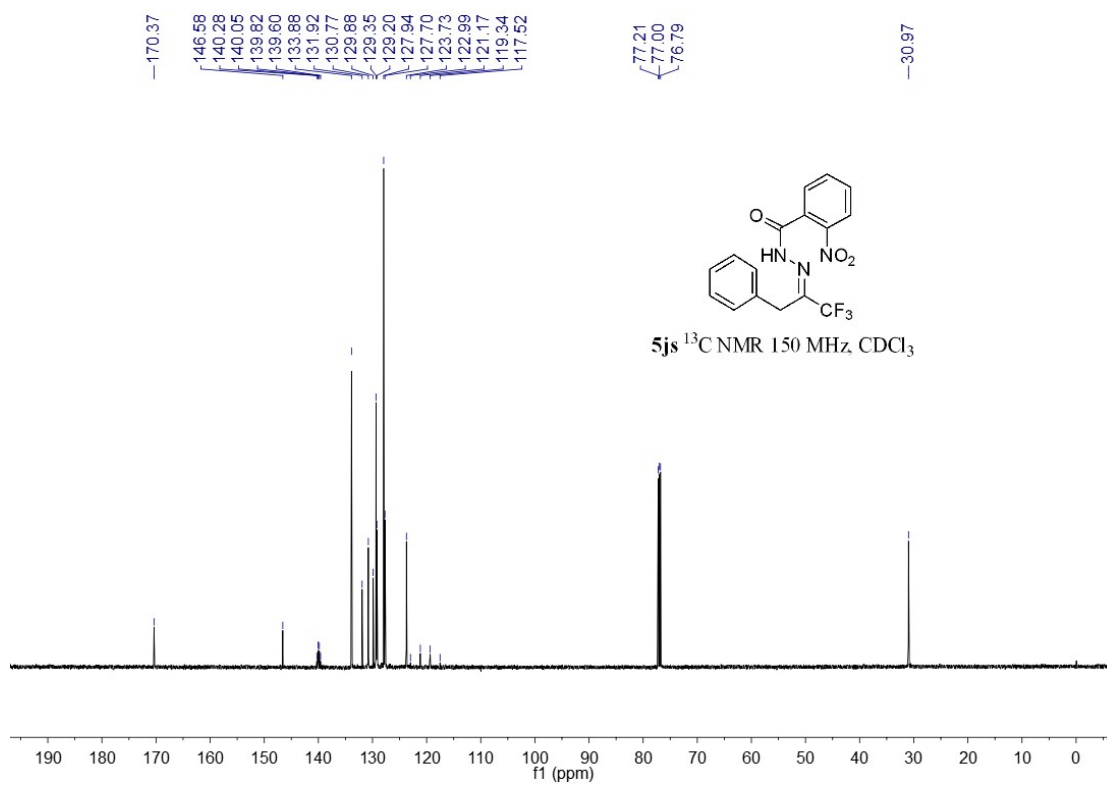

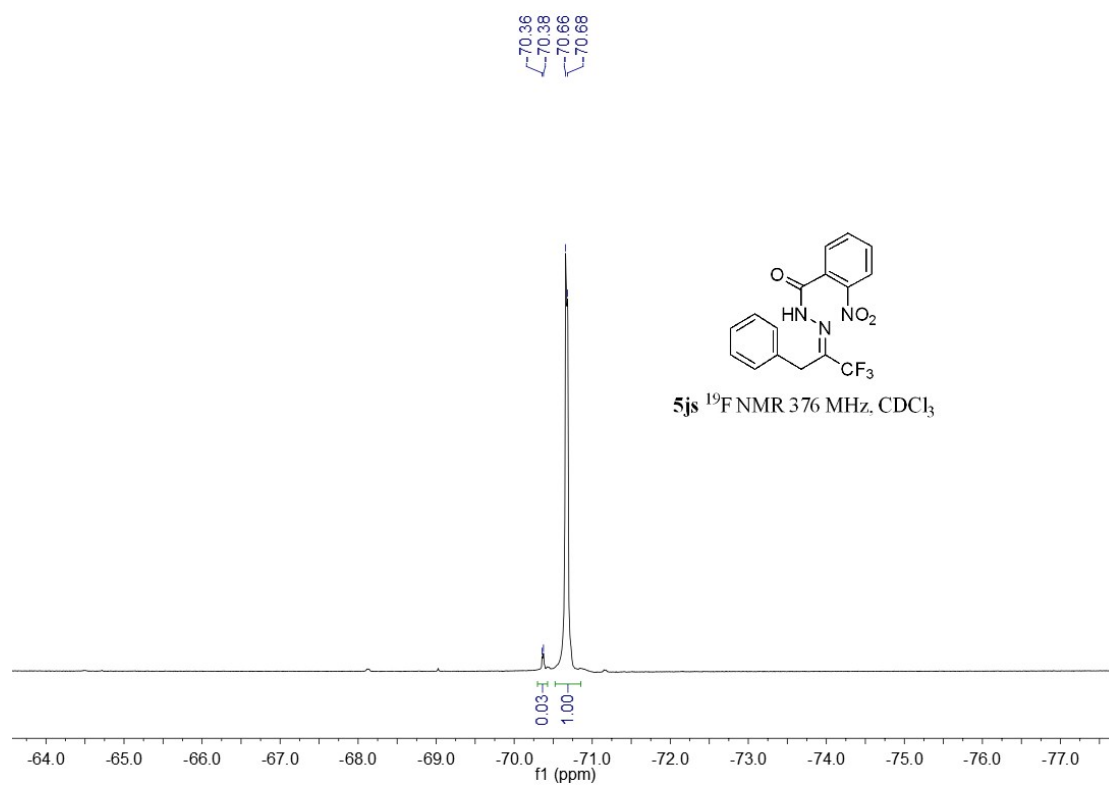

NMR copies of major product of compound **5jt**:

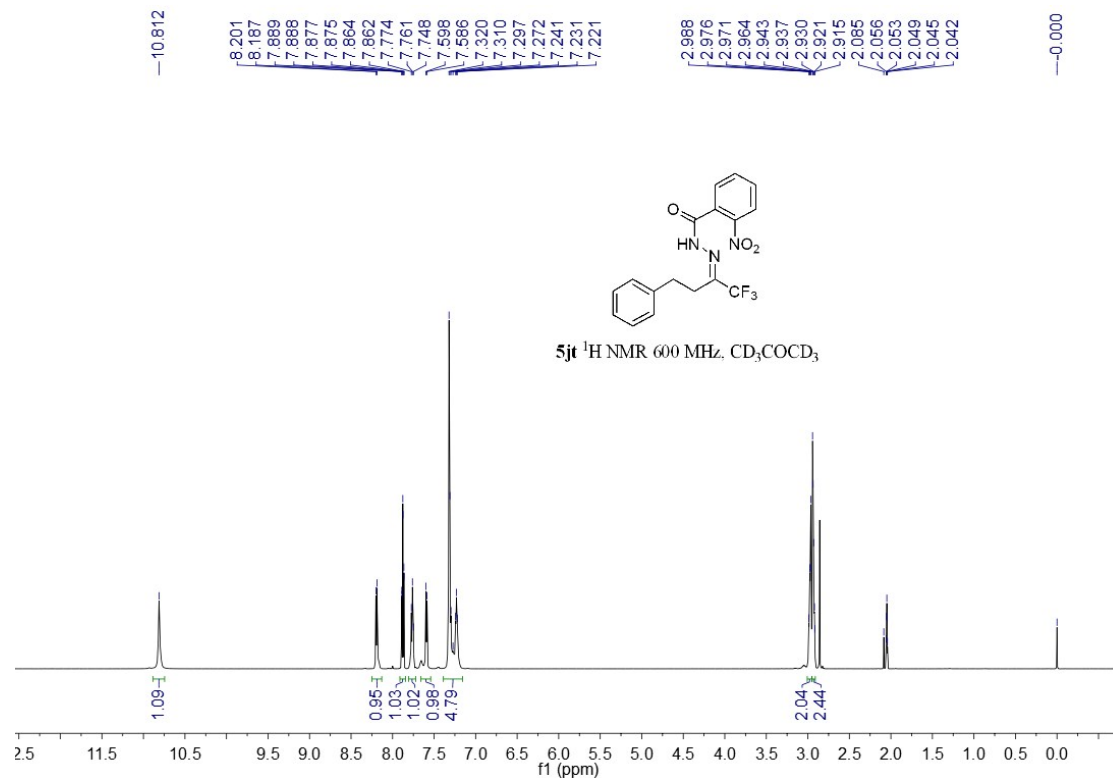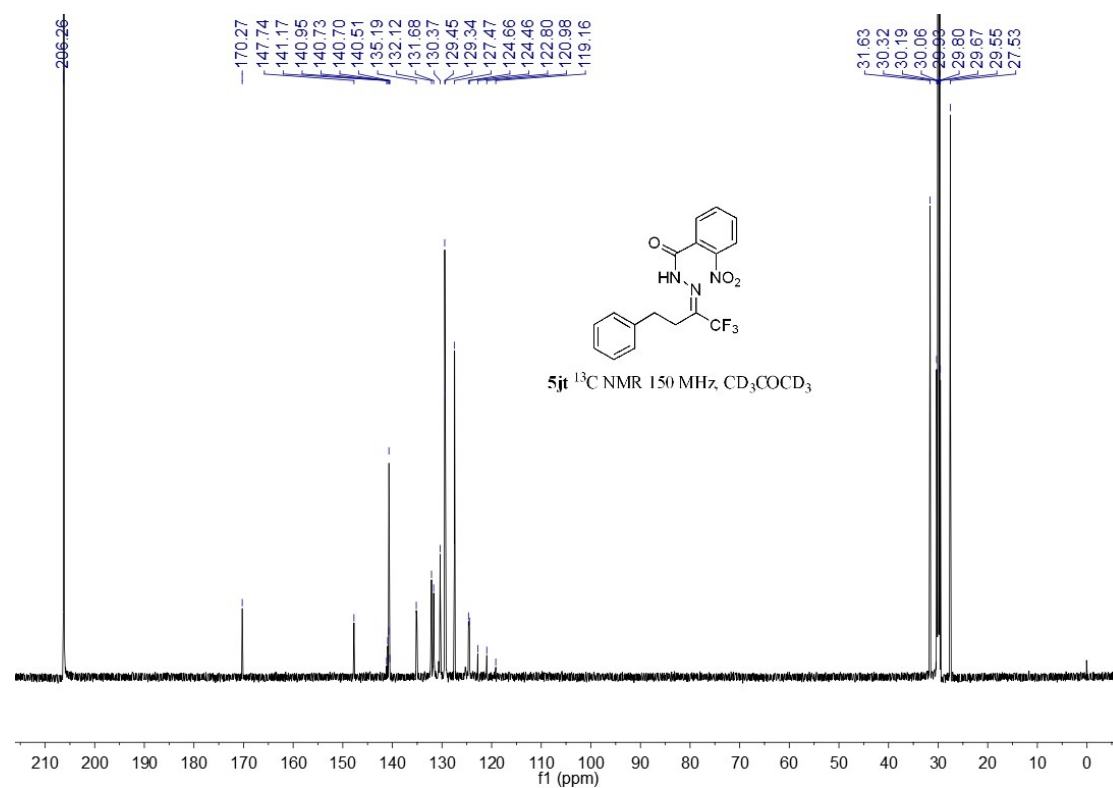

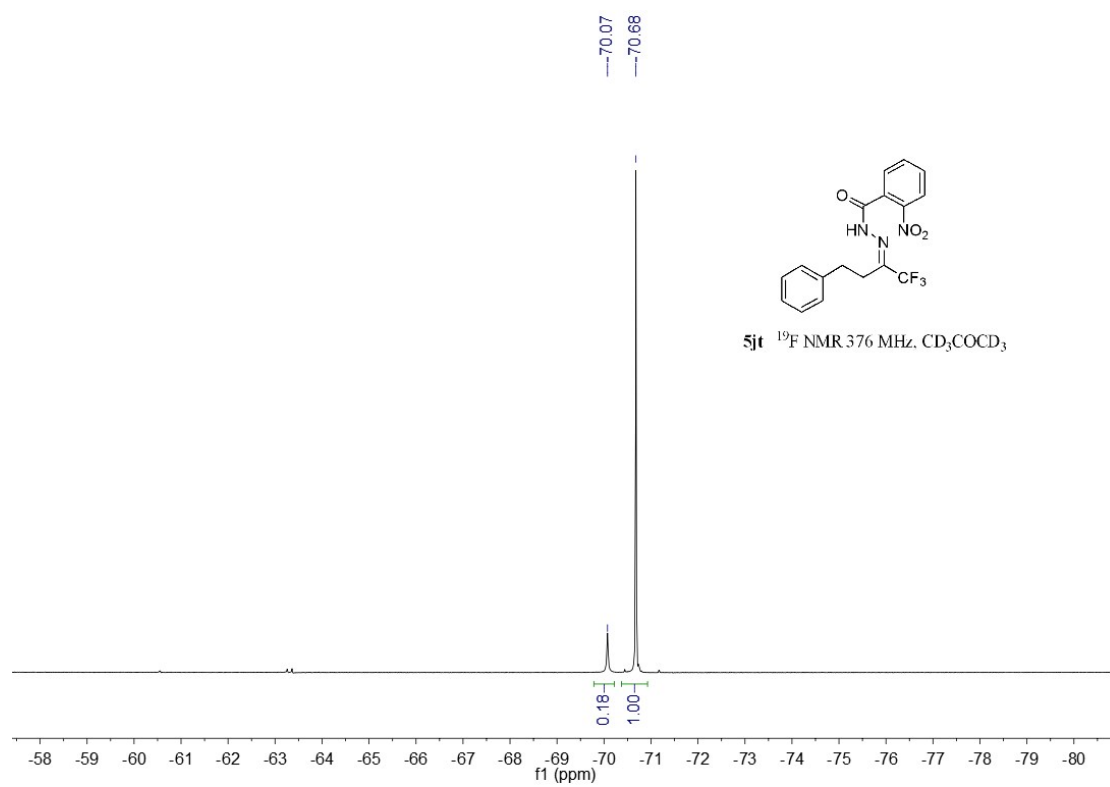

NMR copies of major product of compound **5qa**:

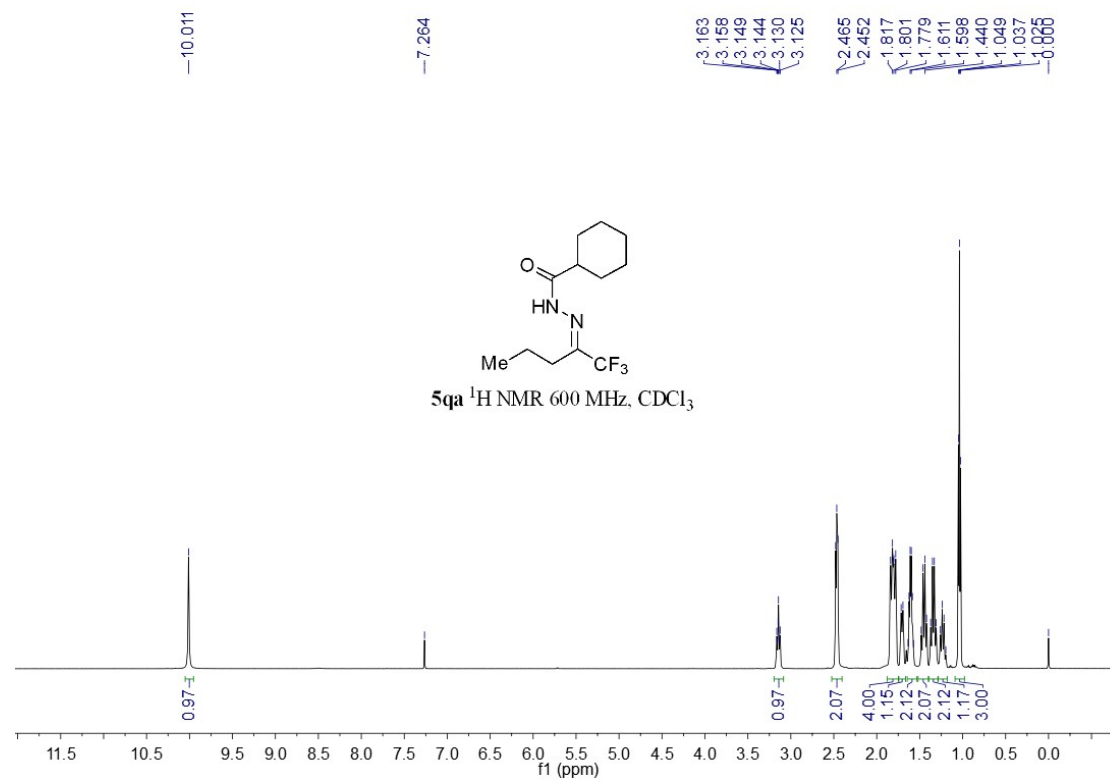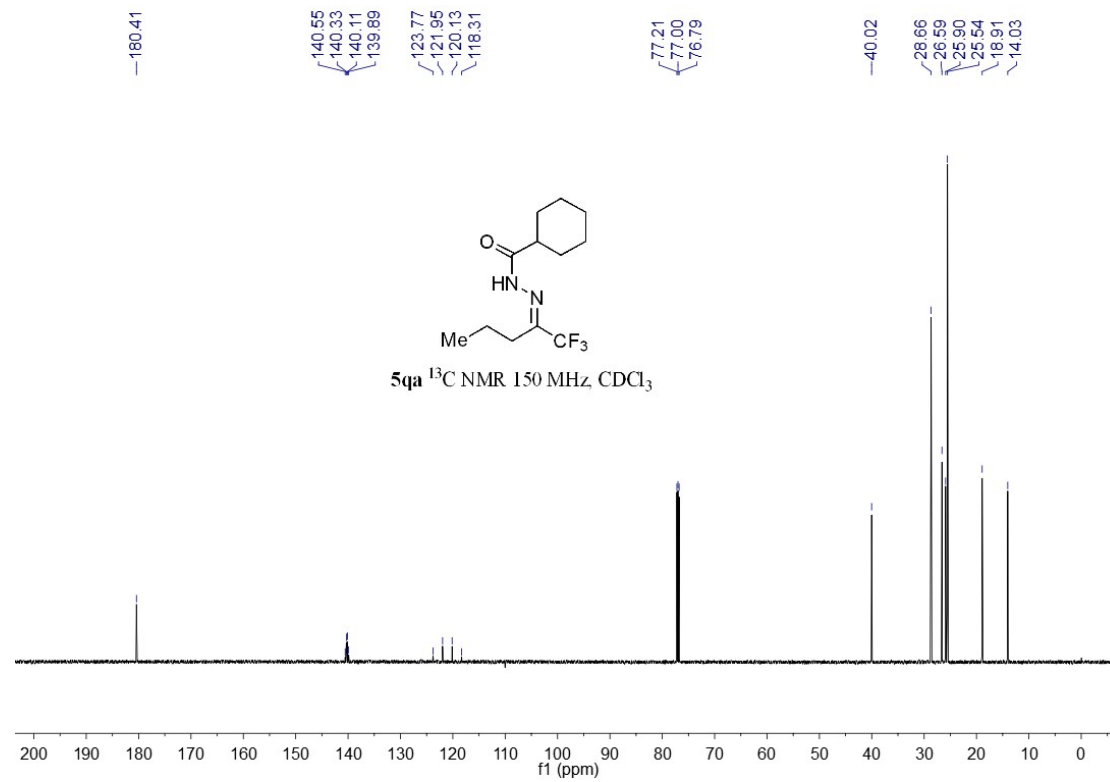



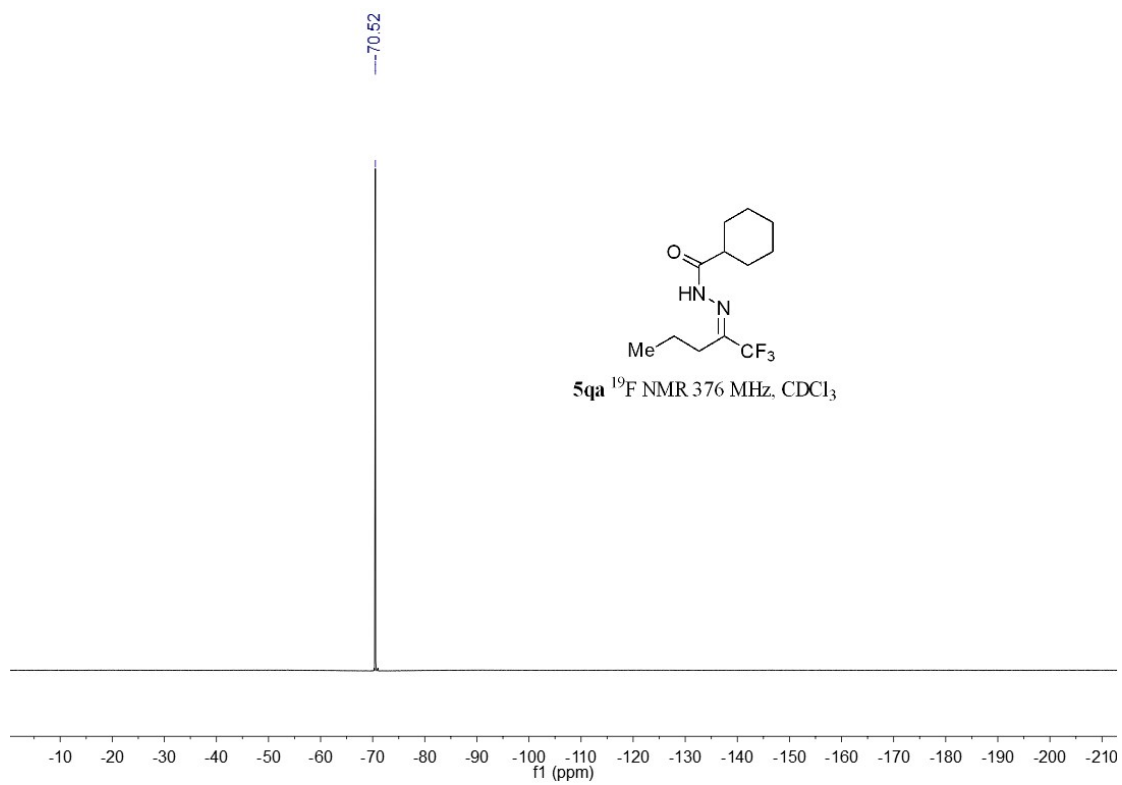

NMR copies of major product of compound **5qb**:

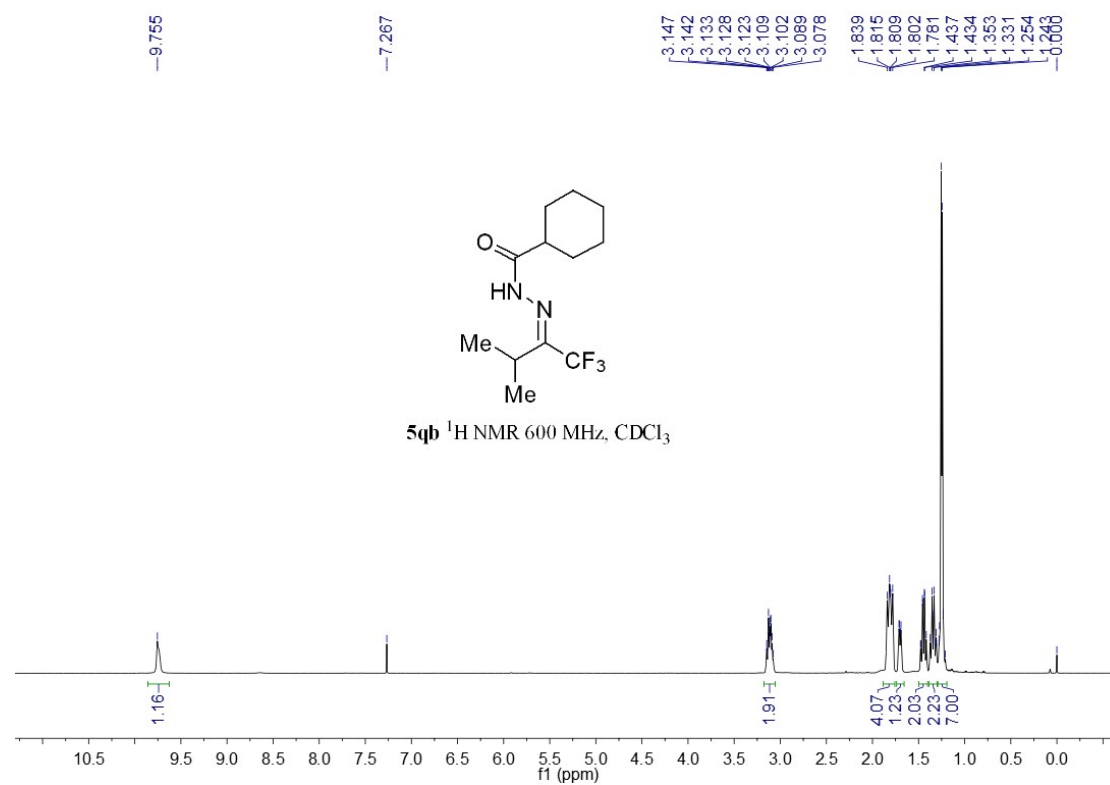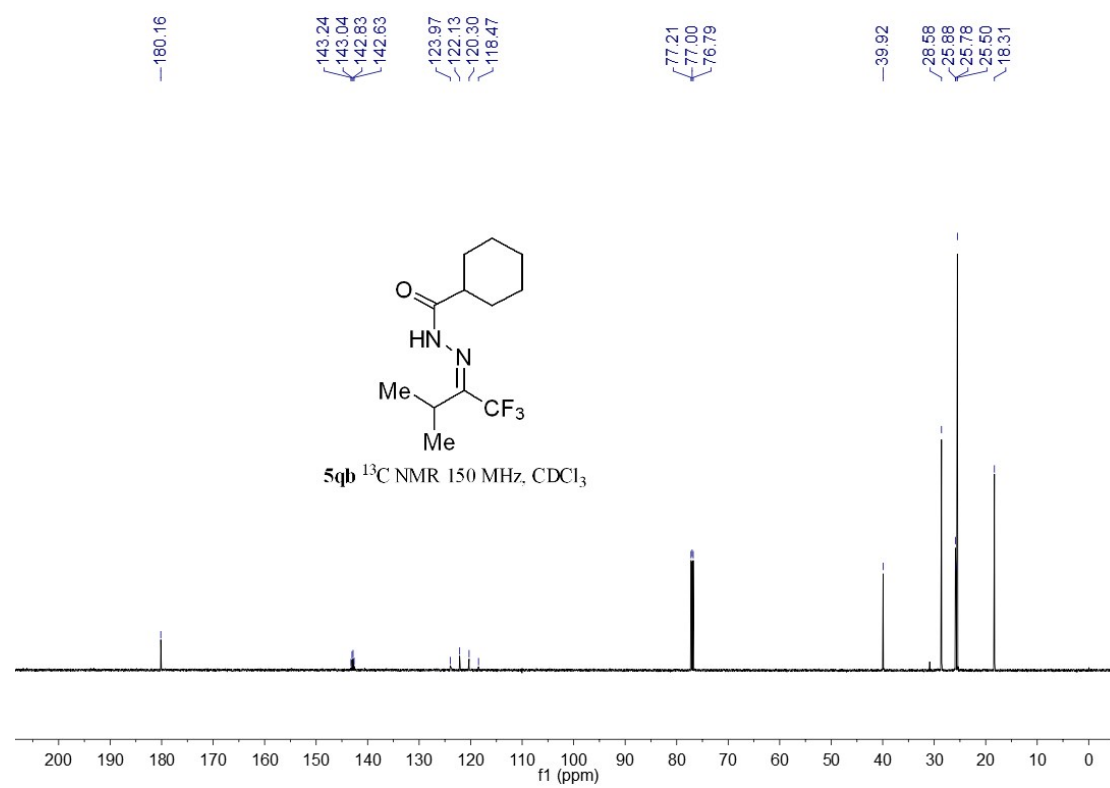

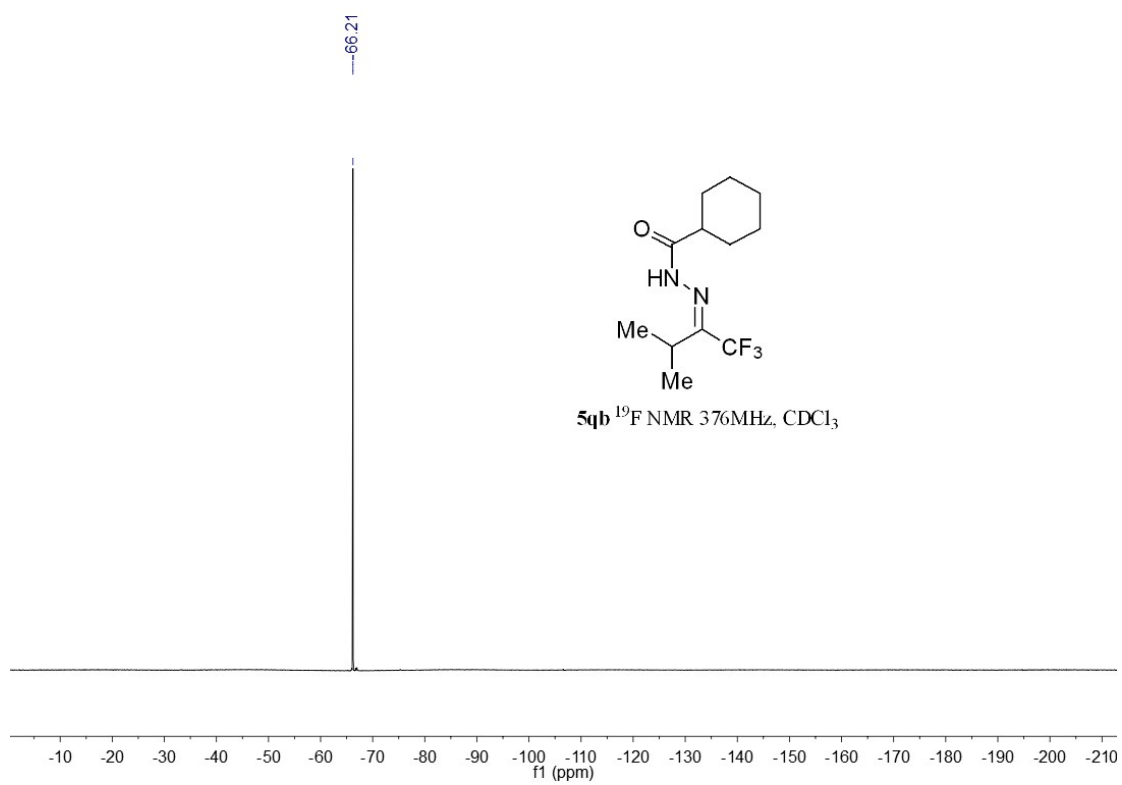

NMR copies of major product of compound **5qc**:

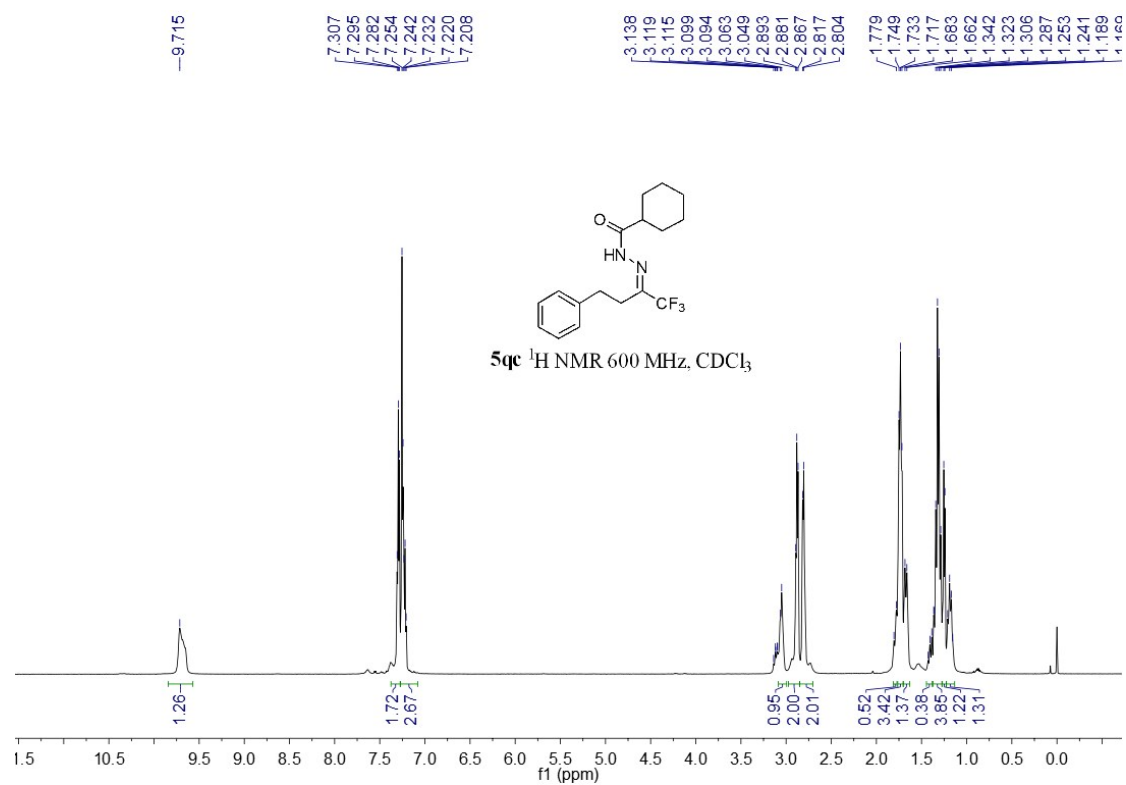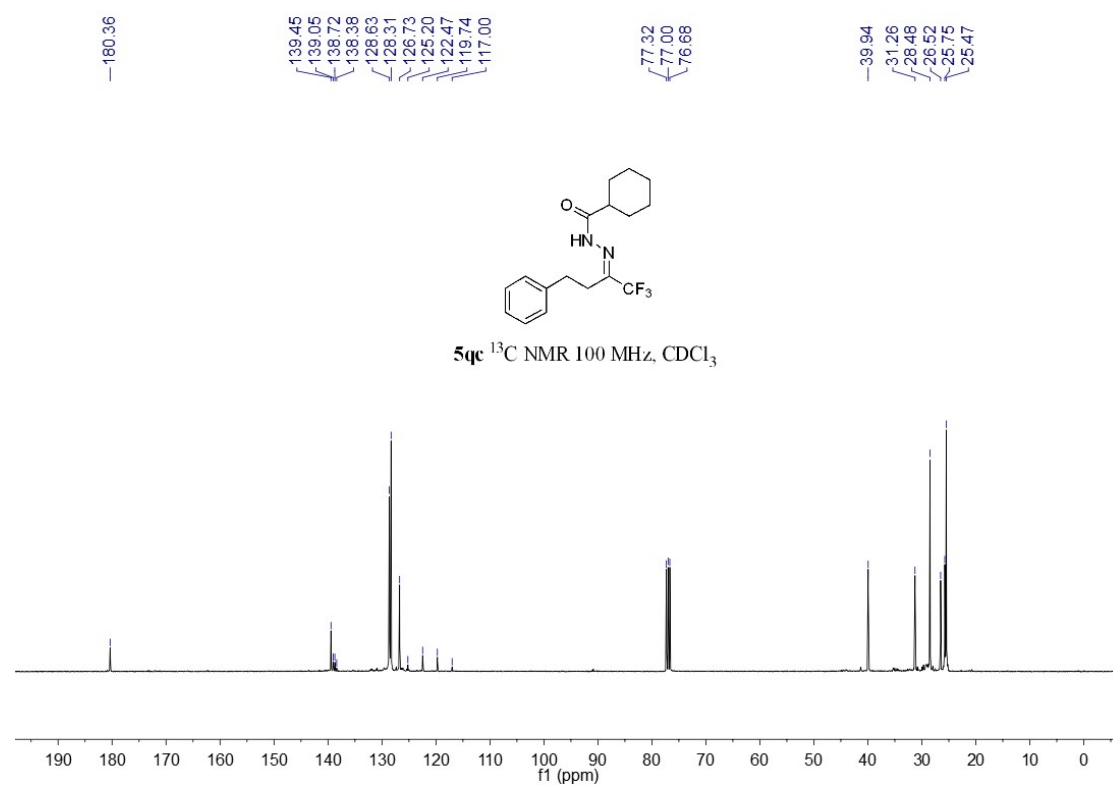

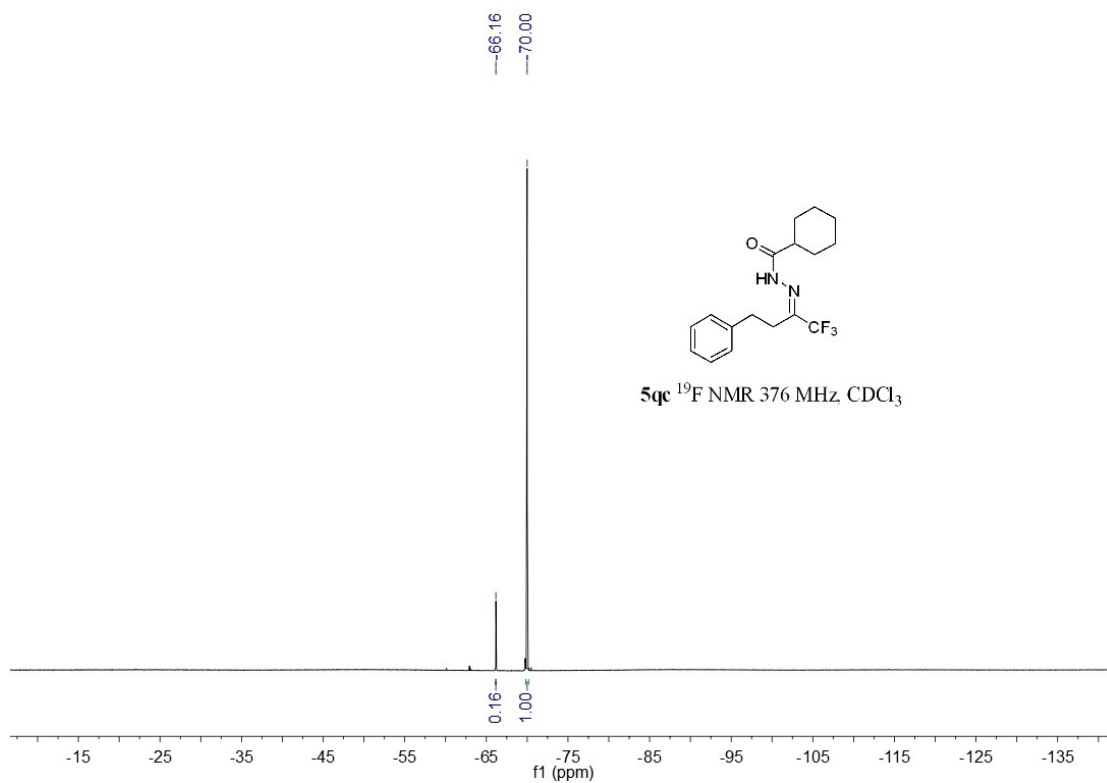

NMR copies of major product of compound **8a**:

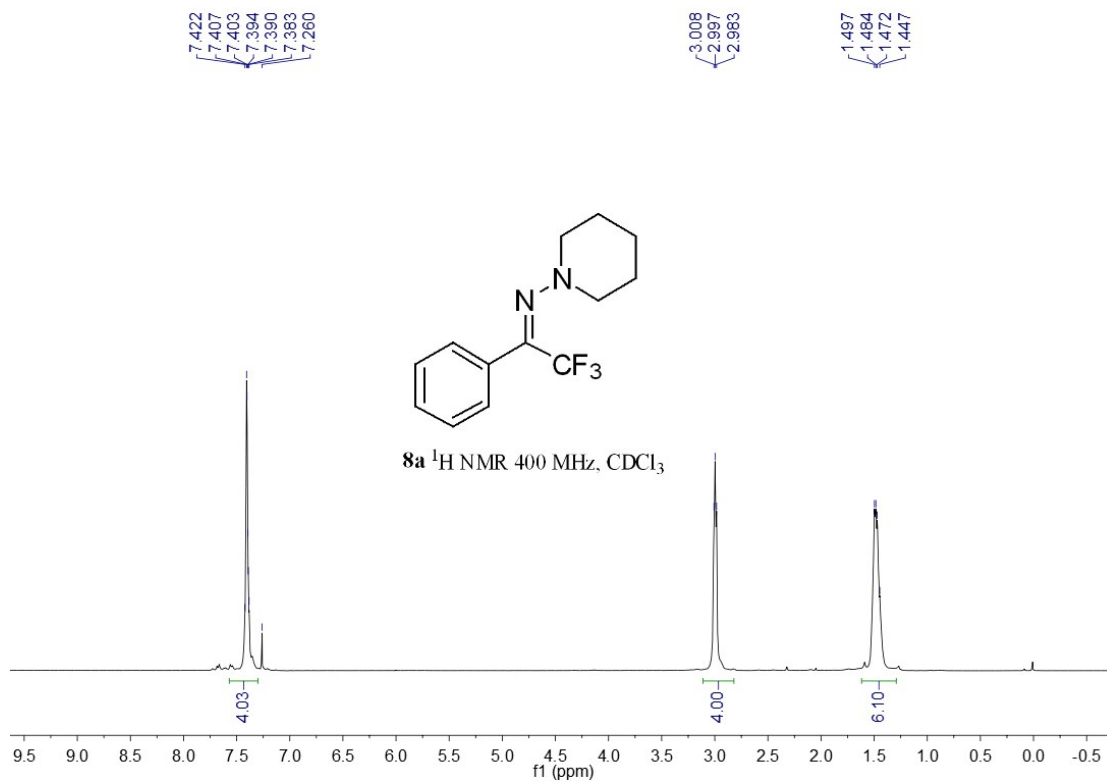

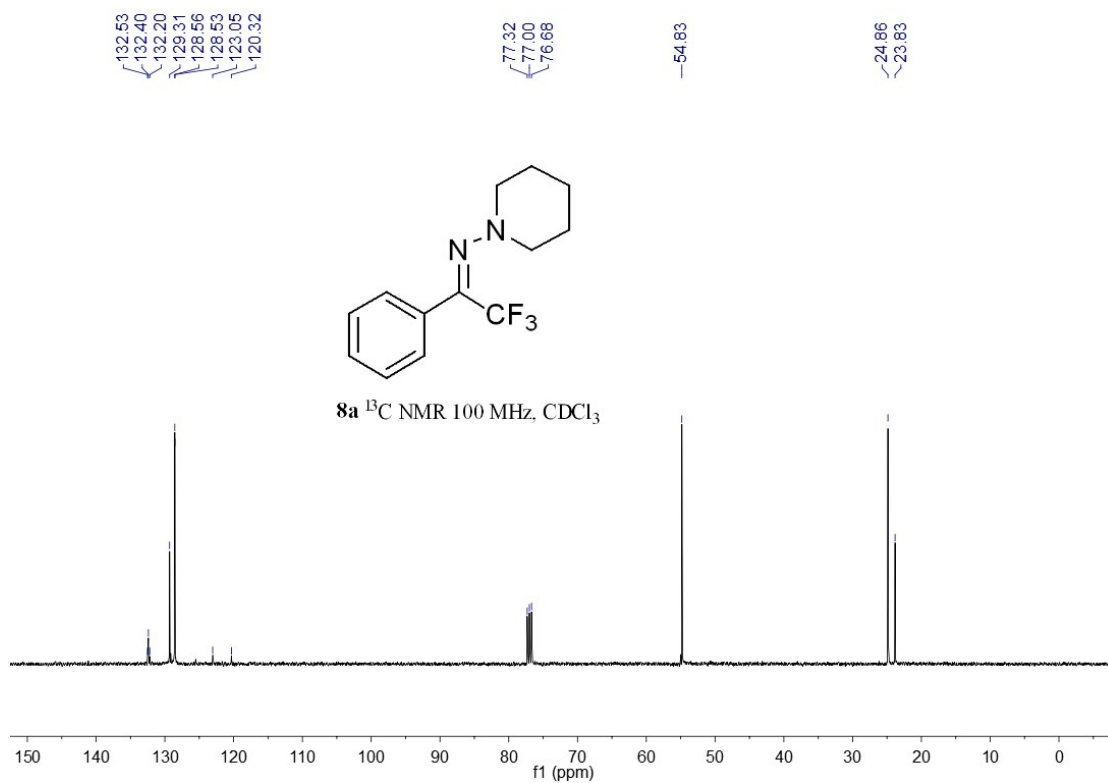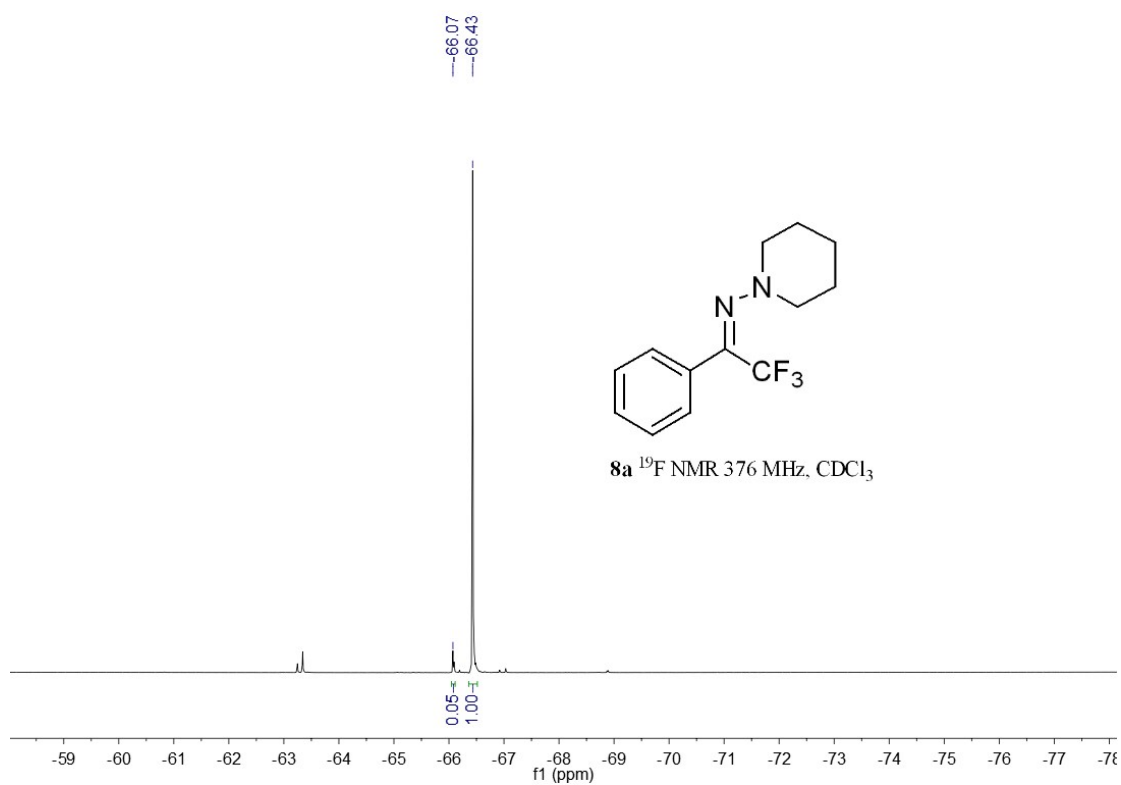

NMR copies of major product of compound **8b**:

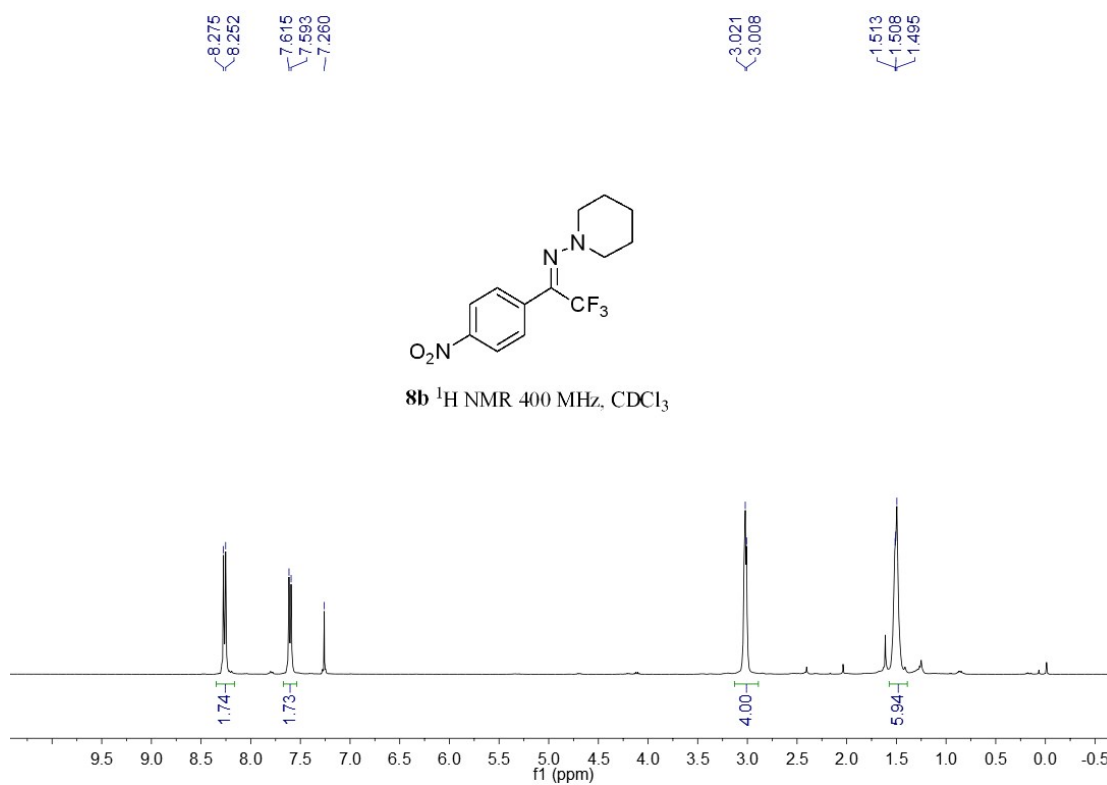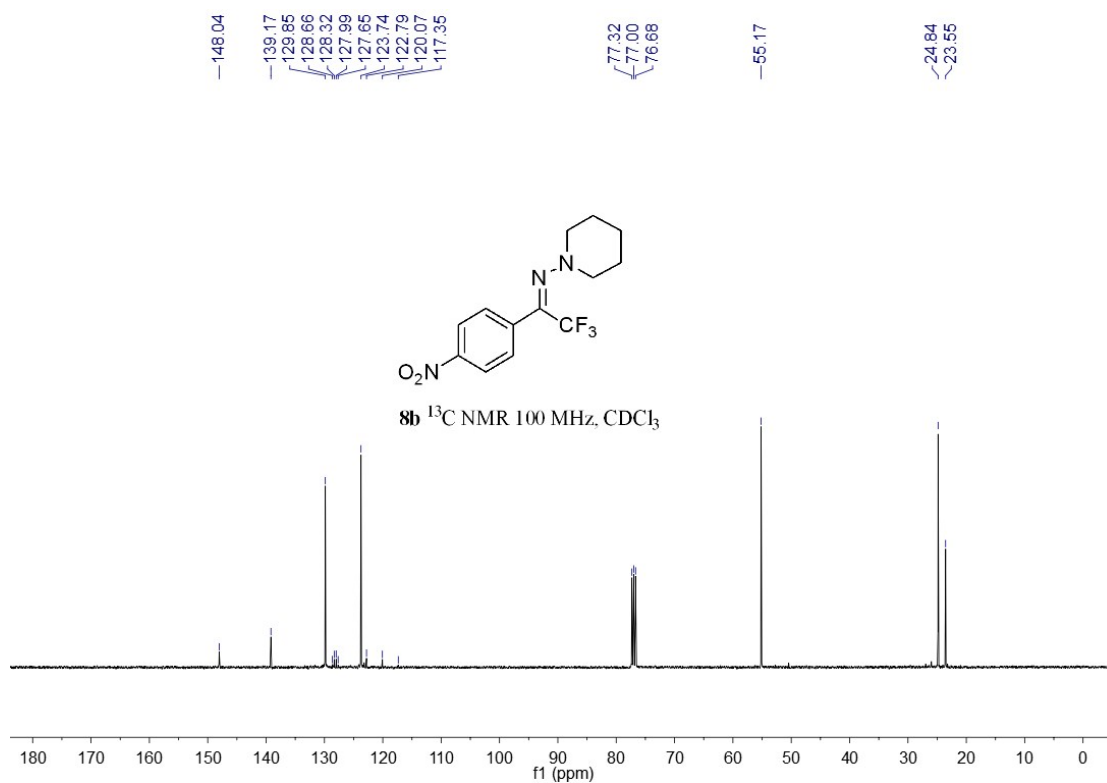

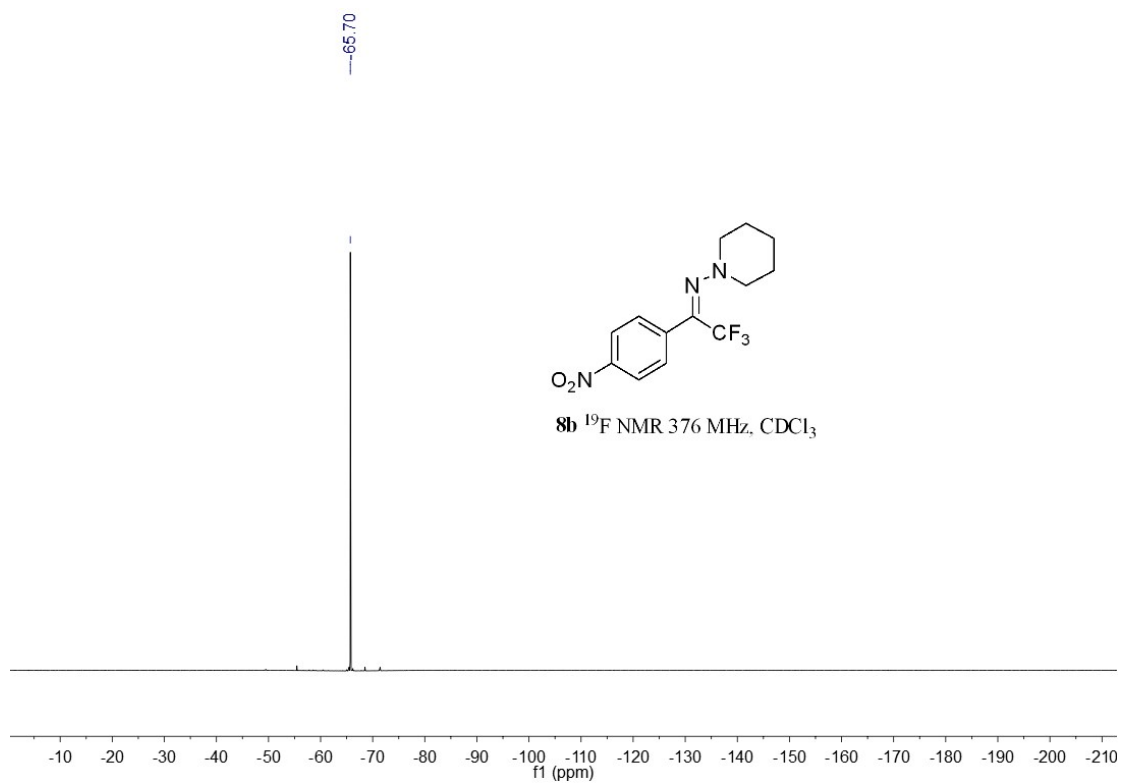

NMR copies of major product of compound **9**:

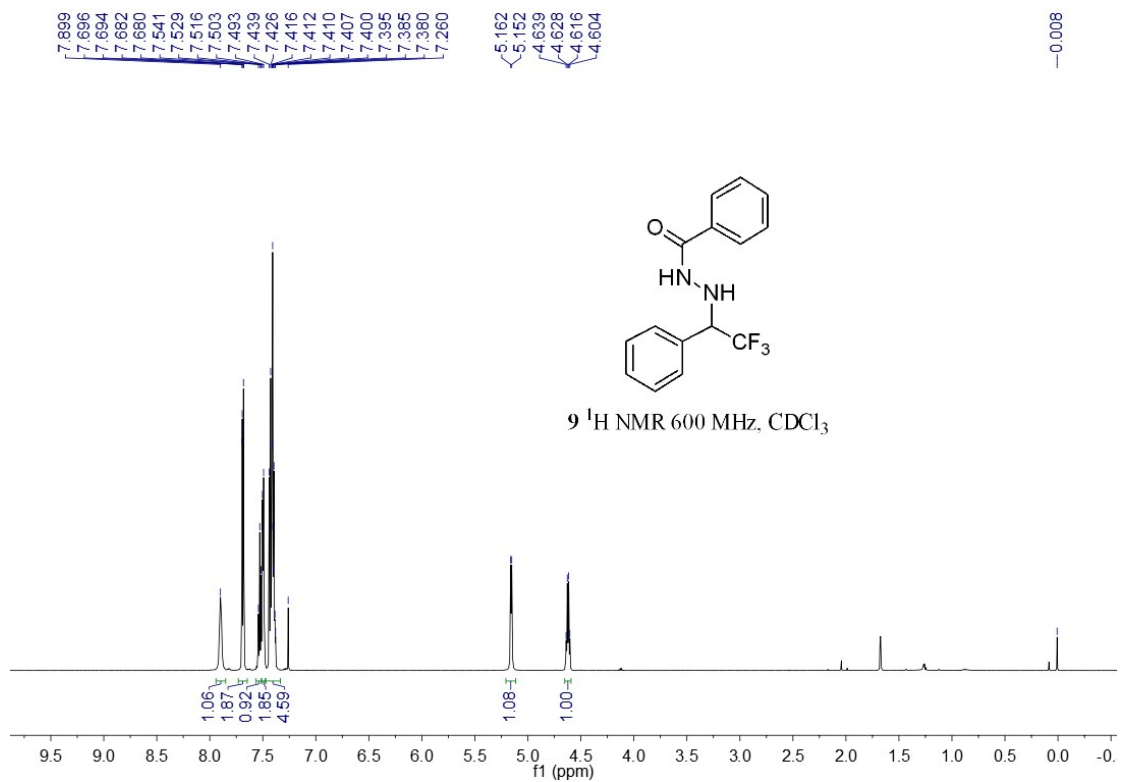



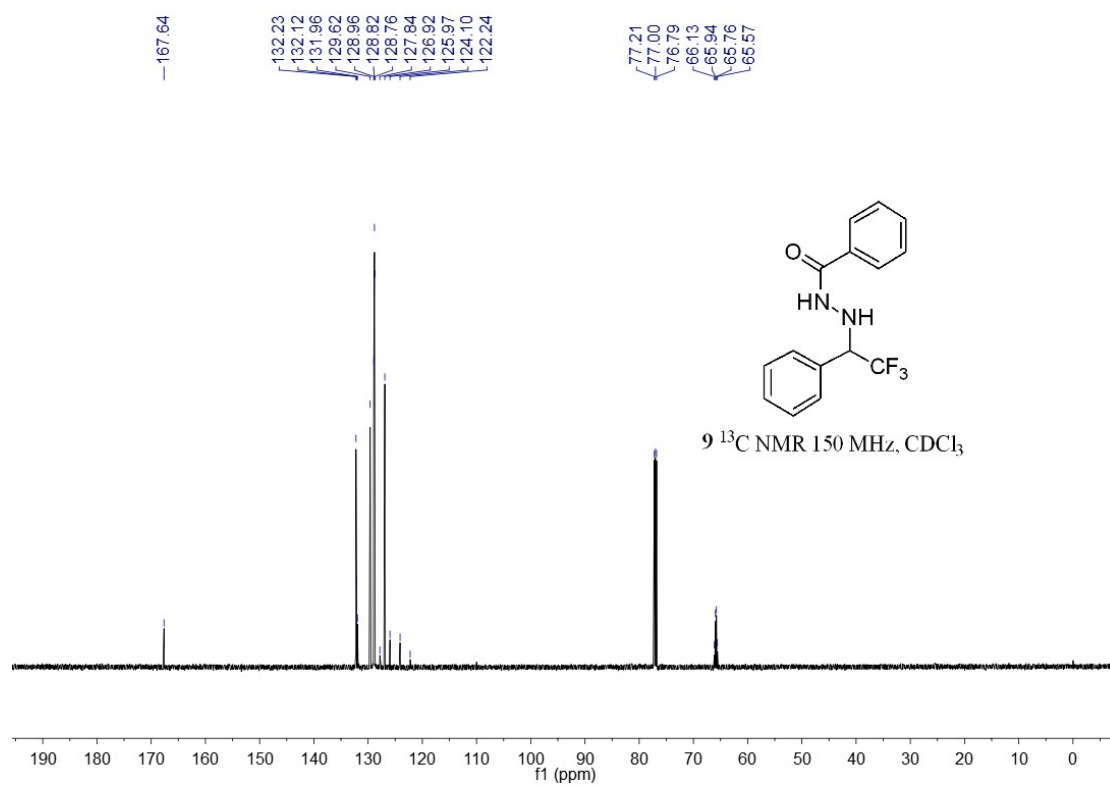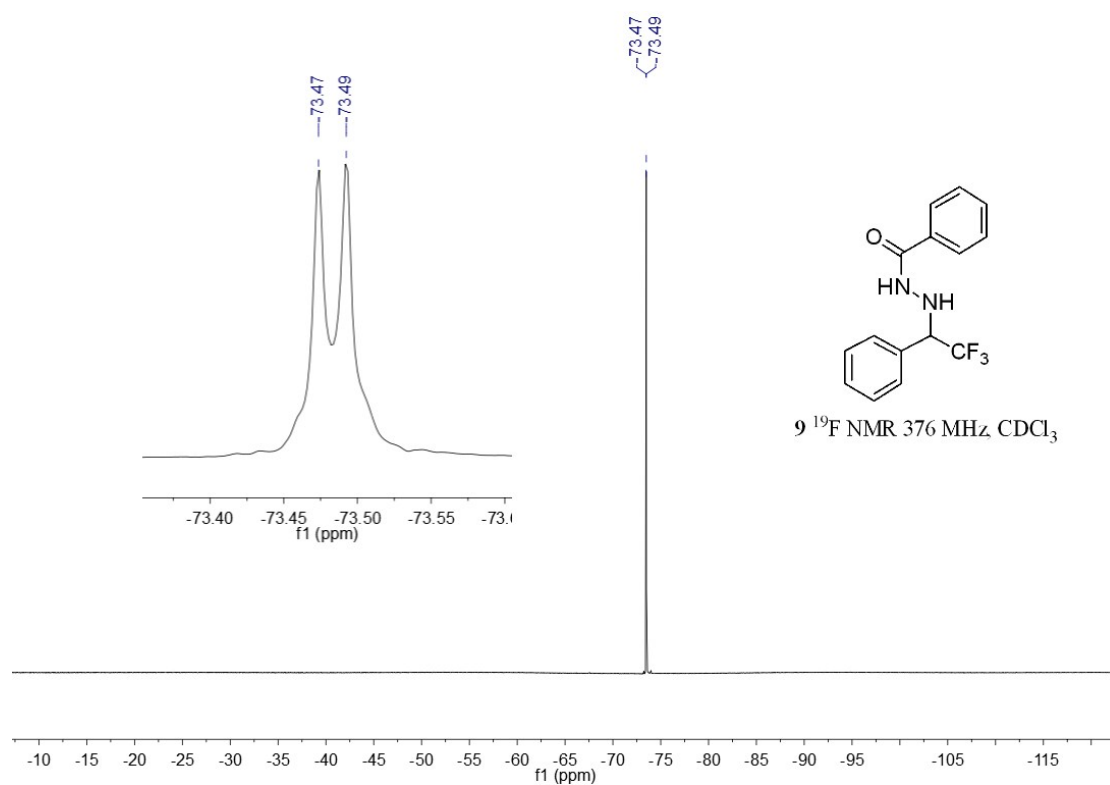

NMR copies of major product of compound **10**:

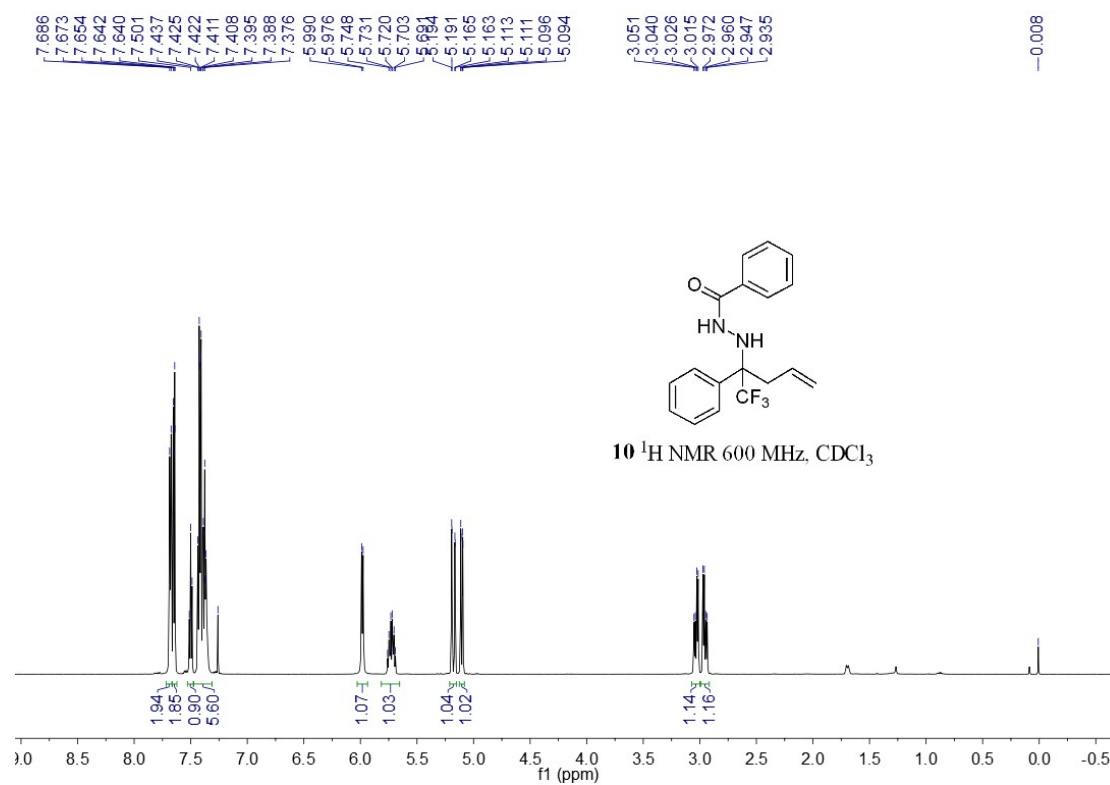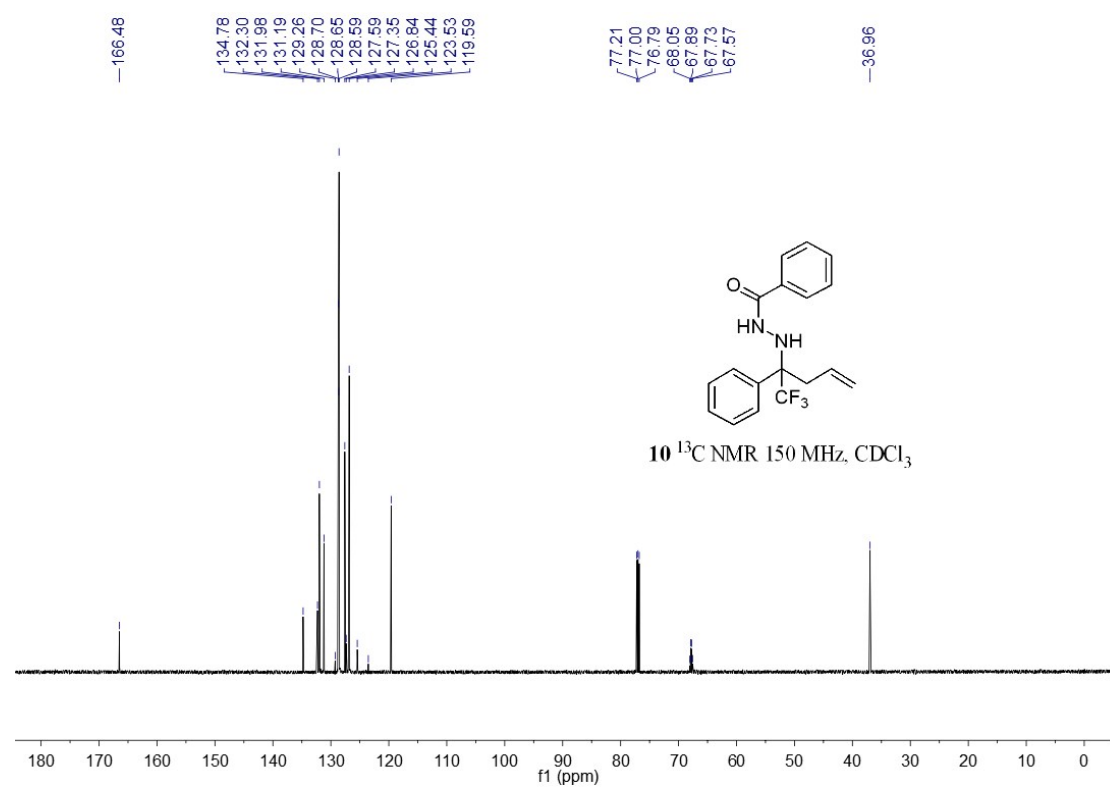

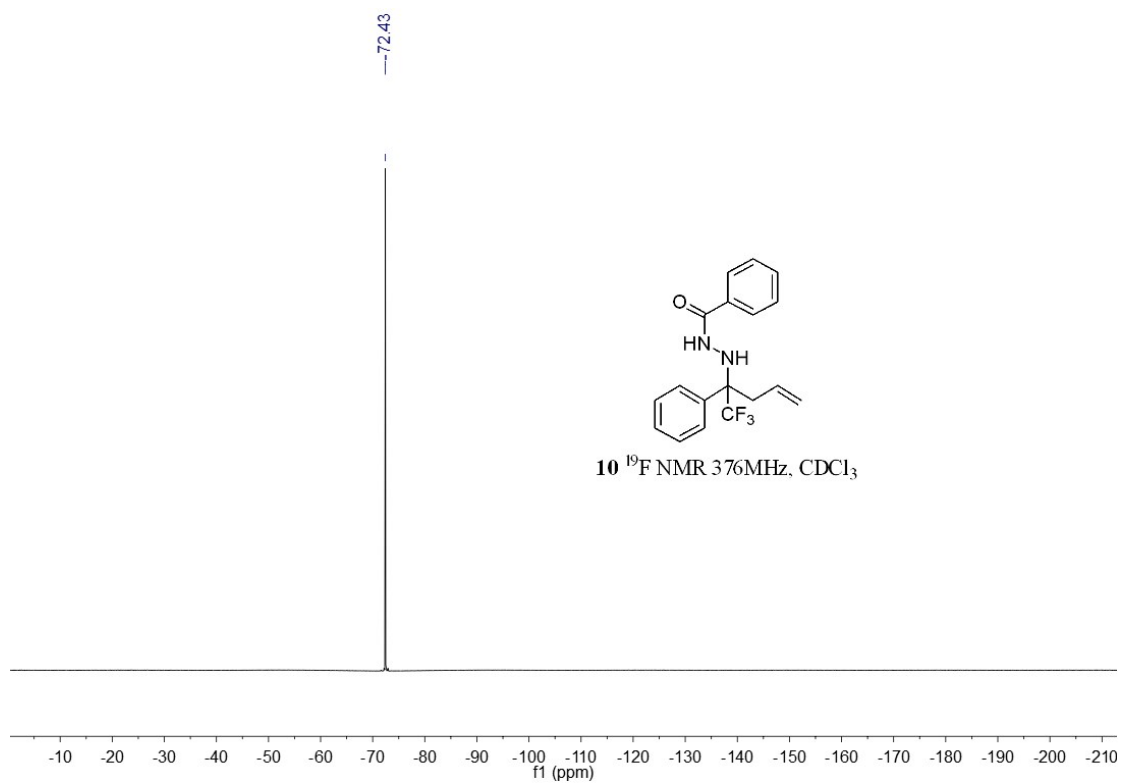

NMR copie of control experiment of **1jh** under standard reaction condition with TEMPO:

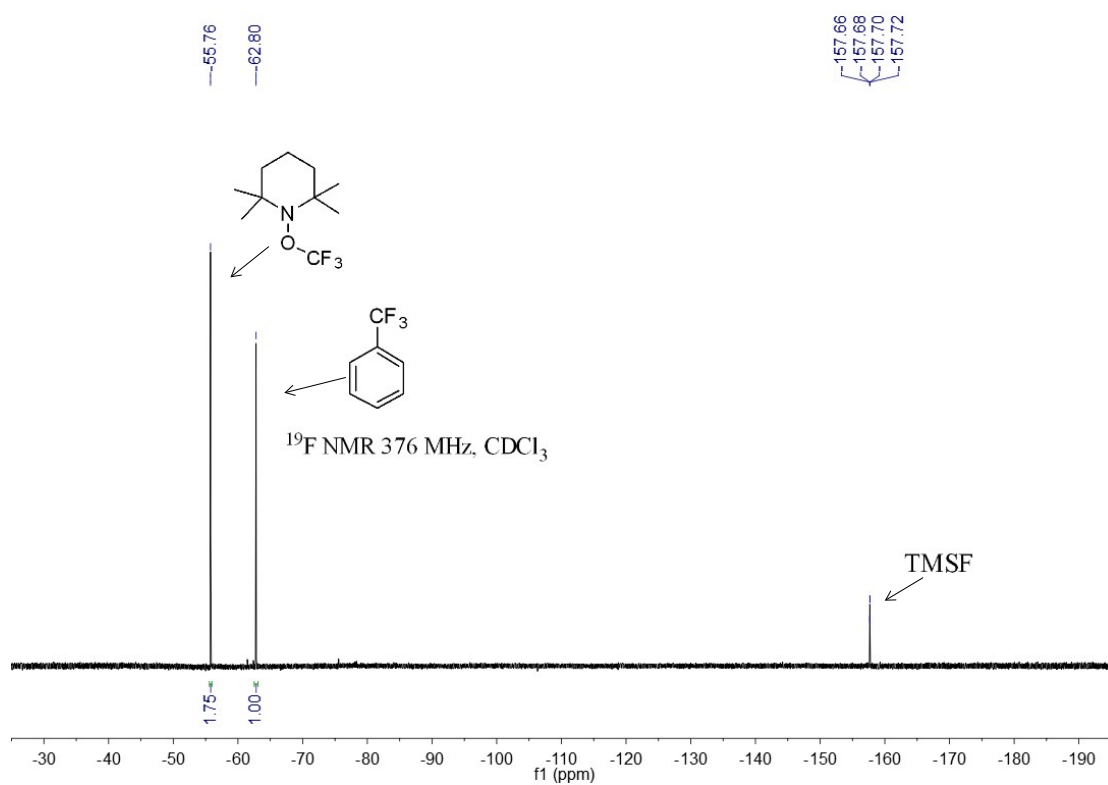

NMR copie of control experiment to proof the existence of the CF<sub>3</sub> radical **18**:

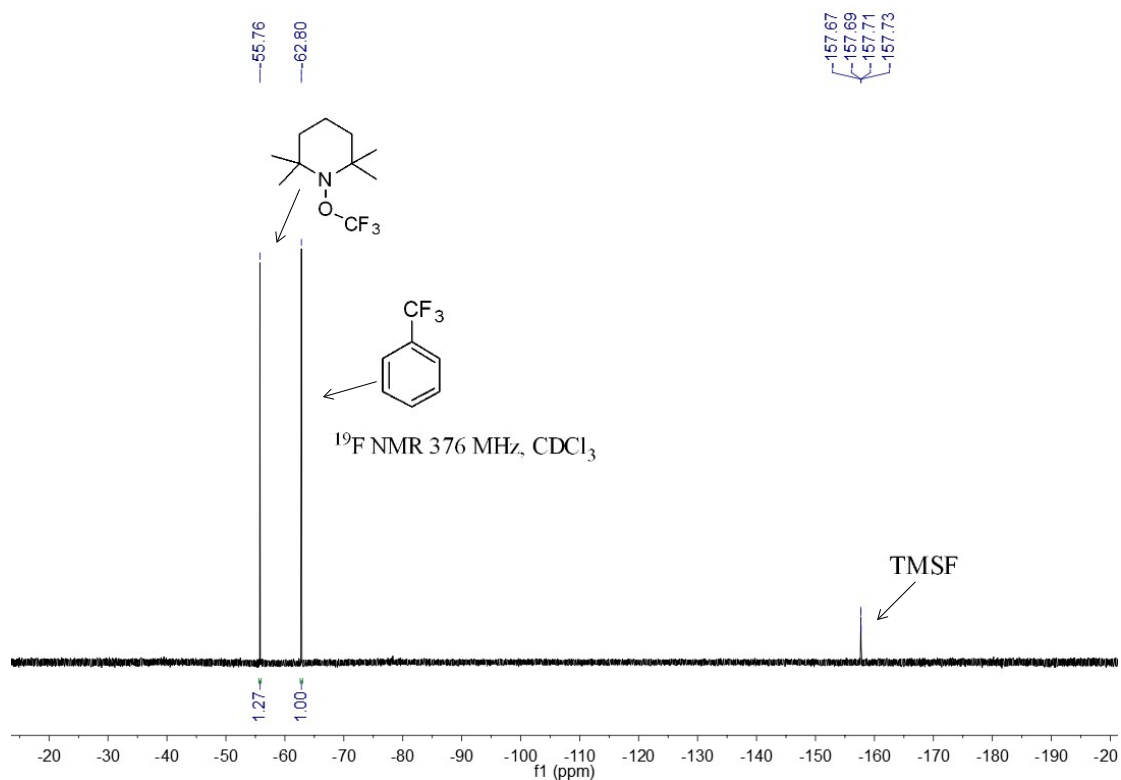

NMR copie of control experiment to proof the existence of the intermediate TMSF **13**:

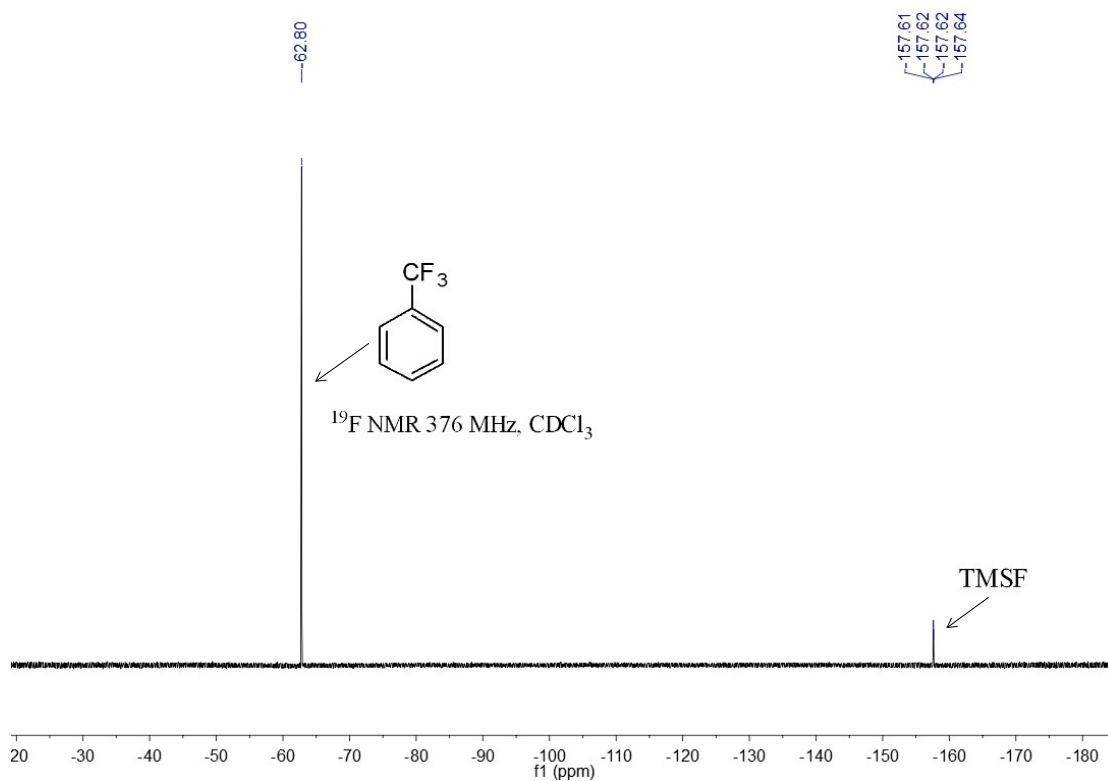

## 2. X-ray crystallographic data of 5a and 6a

The structure of **5a** and **6a** were determined by the X-ray diffraction analysis.

CCDC 1482106 (**5a**), CCDC 1481842 (**6a'**) contain the structure and supplementary crystallographic data. These data can be obtained free of charge via [www.ccdc.cam.ac.uk/data\\_request/cif](http://www.ccdc.cam.ac.uk/data_request/cif).

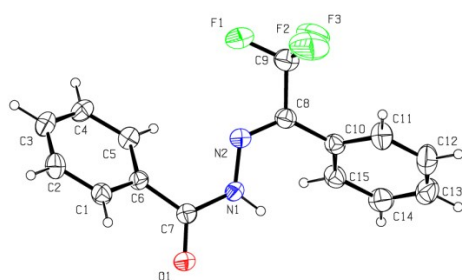

**5a**

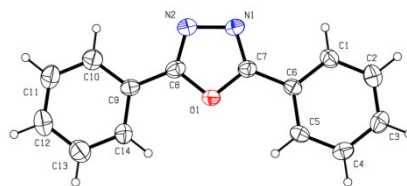

**6a**

**Table 1** Crystal data and structure refinement for Compounds **5a** and **6a**

| Identification code         | <b>5a</b>                                                       | <b>6a</b>                                         |
|-----------------------------|-----------------------------------------------------------------|---------------------------------------------------|
| CCDC Deposit number         | 1482106                                                         | 1481842                                           |
| Empirical formula           | C <sub>15</sub> H <sub>11</sub> F <sub>3</sub> N <sub>2</sub> O | C <sub>14</sub> H <sub>10</sub> N <sub>2</sub> O  |
| Formula weight              | 292.26                                                          | 222.24                                            |
| Temperature (K)             | 294(16)                                                         | 293(10)                                           |
| Wavelength (Å)              | 0.71073                                                         | 0.71073                                           |
| Crystal system              | Monoclinic                                                      | Monoclinic                                        |
| space group                 | P2 <sub>1</sub> /c                                              | P2 <sub>1</sub> /c                                |
| Unit cell dimensions<br>(Å) | a = 5.7064(5)<br>b = 17.0772(13)<br>c = 14.1572(9)              | a = 5.1901(6)<br>b = 18.063(3)<br>c = 12.1410(13) |
| (°)                         | α = 90.00<br>β = 94.665(7)<br>γ = 90.00                         | α = 90<br>β = 93.142(11)<br>γ = 90                |
| Volume                      | 1375.04(18) Å <sup>3</sup>                                      | 1136.5(3) Å <sup>3</sup>                          |
| Z                           | 4                                                               | 4                                                 |

|                                     |                                                                    |                                                                   |
|-------------------------------------|--------------------------------------------------------------------|-------------------------------------------------------------------|
| Calcd. density (Mg/m <sup>3</sup> ) | 1.412                                                              | 1.299                                                             |
| $F(000)$                            | 600.0                                                              | 464                                                               |
| Limiting indices                    | $-7 \leq h \leq 6$<br>$-21 \leq k \leq 20$<br>$-17 \leq l \leq 17$ | $-6 \leq h \leq 6$<br>$-22 \leq k \leq 19$<br>$-14 \leq l \leq 9$ |
